# Supplementary material
Source: publisher figshare collection journal article supplement (https://springernature.figshare.com/ndownloader/files/13138874)
Supplement: Supplementary file 1 [file 13138874]

## Sheet: Table S1
Time		Water level (m)
Date and time (IST)	Hours after earthquake of 11/28/1945 0327 IST	Digitized tracing of scanned marigram	Accepted tidal curve (Table S2)	Residual
1945-11-15 10:45:00	-304.7	1.721	1.673	0.048
1945-11-15 10:46:43	-304.671	1.71	1.662	0.048
1945-11-15 10:47:36	-304.657	1.699	1.657	0.042
1945-11-15 10:49:19	-304.628	1.688	1.646	0.042
1945-11-15 10:50:11	-304.614	1.68	1.641	0.039
1945-11-15 10:51:54	-304.585	1.669	1.63	0.039
1945-11-15 10:53:36	-304.557	1.658	1.62	0.039
1945-11-15 10:54:29	-304.542	1.649	1.614	0.035
1945-11-15 10:56:11	-304.514	1.639	1.604	0.035
1945-11-15 10:57:54	-304.485	1.629	1.593	0.036
1945-11-15 10:58:45	-304.471	1.623	1.588	0.035
1945-11-15 11:00:27	-304.442	1.615	1.578	0.037
1945-11-15 11:02:10	-304.414	1.606	1.567	0.039
1945-11-15 11:03:52	-304.386	1.595	1.557	0.039
1945-11-15 11:05:35	-304.357	1.585	1.546	0.038
1945-11-15 11:07:18	-304.328	1.574	1.536	0.038
1945-11-15 11:09:00	-304.3	1.565	1.526	0.039
1945-11-15 11:10:43	-304.271	1.553	1.515	0.037
1945-11-15 11:11:35	-304.257	1.545	1.51	0.035
1945-11-15 11:12:27	-304.243	1.539	1.505	0.034
1945-11-15 11:14:08	-304.214	1.533	1.495	0.038
1945-11-15 11:15:00	-304.2	1.524	1.49	0.034
1945-11-15 11:15:53	-304.185	1.516	1.484	0.031
1945-11-15 11:16:44	-304.171	1.51	1.479	0.031
1945-11-15 11:17:35	-304.157	1.505	1.474	0.03
1945-11-15 11:18:27	-304.142	1.5	1.469	0.03
1945-11-15 11:20:09	-304.114	1.49	1.459	0.031
1945-11-15 11:21:51	-304.086	1.483	1.449	0.033
1945-11-15 11:22:43	-304.071	1.474	1.444	0.03
1945-11-15 11:24:25	-304.043	1.465	1.434	0.031
1945-11-15 11:25:17	-304.029	1.46	1.429	0.031
1945-11-15 11:26:59	-304	1.449	1.419	0.03
1945-11-15 11:28:42	-303.972	1.439	1.41	0.029
1945-11-15 11:30:25	-303.943	1.428	1.4	0.028
1945-11-15 11:32:08	-303.914	1.418	1.39	0.028
1945-11-15 11:33:50	-303.886	1.408	1.38	0.028
1945-11-15 11:34:42	-303.872	1.399	1.376	0.024
1945-11-15 11:36:25	-303.843	1.389	1.366	0.023
1945-11-15 11:37:17	-303.829	1.379	1.361	0.018
1945-11-15 11:39:00	-303.8	1.367	1.352	0.016
1945-11-15 11:40:43	-303.771	1.357	1.342	0.015
1945-11-15 11:42:26	-303.743	1.346	1.333	0.014
1945-11-15 11:44:08	-303.714	1.338	1.323	0.014
1945-11-15 11:45:49	-303.686	1.333	1.314	0.019
1945-11-15 11:47:30	-303.658	1.33	1.305	0.025
1945-11-15 11:48:21	-303.644	1.324	1.301	0.023
1945-11-15 11:49:13	-303.63	1.318	1.296	0.022
1945-11-15 11:50:04	-303.616	1.313	1.292	0.022
1945-11-15 11:50:56	-303.601	1.307	1.287	0.02
1945-11-15 11:52:37	-303.573	1.299	1.278	0.021
1945-11-15 12:05:28	-303.359	1.217	1.213	0.004
1945-11-15 12:06:19	-303.345	1.213	1.209	0.004
1945-11-15 12:08:01	-303.316	1.208	1.201	0.007
1945-11-15 12:09:42	-303.288	1.201	1.193	0.008
1945-11-15 12:10:33	-303.274	1.196	1.189	0.007
1945-11-15 12:14:49	-303.203	1.173	1.169	0.003
1945-11-15 12:15:42	-303.188	1.163	1.165	-0.002
1945-11-15 12:17:24	-303.16	1.153	1.158	-0.004
1945-11-15 12:19:07	-303.131	1.143	1.15	-0.007
1945-11-15 12:20:49	-303.103	1.133	1.143	-0.009
1945-11-15 12:22:32	-303.074	1.123	1.135	-0.013
1945-11-15 12:25:04	-303.032	1.113	1.124	-0.011
1945-11-15 12:25:57	-303.017	1.104	1.121	-0.016
1945-11-15 12:28:29	-302.975	1.095	1.11	-0.015
1945-11-15 12:30:10	-302.947	1.088	1.103	-0.015
1945-11-15 12:31:52	-302.919	1.081	1.096	-0.015
1945-11-15 12:34:25	-302.876	1.07	1.086	-0.016
1945-11-15 12:36:07	-302.848	1.062	1.08	-0.018
1945-11-15 12:38:39	-302.806	1.052	1.07	-0.018
1945-11-15 12:41:11	-302.764	1.044	1.061	-0.017
1945-11-15 12:42:53	-302.735	1.036	1.055	-0.019
1945-11-15 12:44:34	-302.707	1.031	1.049	-0.018
1945-11-15 12:46:16	-302.679	1.026	1.043	-0.018
1945-11-15 12:47:07	-302.665	1.021	1.041	-0.019
1945-11-15 12:47:58	-302.651	1.018	1.038	-0.02
1945-11-15 12:49:40	-302.622	1.01	1.032	-0.023
1945-11-15 12:52:11	-302.58	1.004	1.024	-0.02
1945-11-15 12:53:52	-302.552	0.999	1.019	-0.02
1945-11-15 12:55:33	-302.524	0.994	1.014	-0.02
1945-11-15 12:57:15	-302.496	0.988	1.009	-0.021
1945-11-15 12:58:56	-302.468	0.983	1.004	-0.021
1945-11-15 13:00:37	-302.44	0.979	1	-0.021
1945-11-15 13:01:28	-302.426	0.973	0.997	-0.024
1945-11-15 13:03:59	-302.384	0.969	0.991	-0.021
1945-11-15 13:04:50	-302.369	0.964	0.988	-0.025
1945-11-15 13:05:41	-302.355	0.962	0.986	-0.025
1945-11-15 13:08:11	-302.314	0.961	0.98	-0.02
1945-11-15 13:10:41	-302.272	0.96	0.974	-0.015
1945-11-15 13:11:31	-302.258	0.957	0.973	-0.015
1945-11-15 13:12:22	-302.244	0.955	0.971	-0.015
1945-11-15 13:14:02	-302.216	0.954	0.967	-0.013
1945-11-15 13:15:43	-302.188	0.951	0.964	-0.013
1945-11-15 13:17:24	-302.16	0.947	0.961	-0.014
1945-11-15 13:19:05	-302.132	0.943	0.958	-0.015
1945-11-15 13:20:45	-302.104	0.939	0.955	-0.015
1945-11-15 13:23:16	-302.062	0.937	0.95	-0.013
1945-11-15 13:24:56	-302.034	0.936	0.948	-0.012
1945-11-15 13:27:26	-301.993	0.934	0.944	-0.01
1945-11-15 13:30:46	-301.937	0.934	0.94	-0.006
1945-11-15 13:34:05	-301.882	0.934	0.937	-0.003
1945-11-15 13:38:15	-301.812	0.934	0.933	0.001
1945-11-15 13:40:45	-301.771	0.932	0.932	0
1945-11-15 13:42:26	-301.743	0.93	0.931	-0.001
1945-11-15 13:45:45	-301.688	0.93	0.93	0
1945-11-15 13:48:15	-301.646	0.93	0.929	0.001
1945-11-15 13:50:44	-301.604	0.931	0.929	0.002
1945-11-15 13:54:04	-301.549	0.931	0.93	0.001
1945-11-15 13:56:33	-301.507	0.932	0.93	0.002
1945-11-15 13:59:03	-301.466	0.933	0.932	0.001
1945-11-15 14:00:42	-301.438	0.935	0.933	0.003
1945-11-15 14:02:22	-301.411	0.936	0.934	0.002
1945-11-15 14:04:51	-301.369	0.937	0.936	0.002
1945-11-15 14:08:10	-301.314	0.938	0.939	-0.001
1945-11-15 14:09:50	-301.286	0.94	0.941	0
1945-11-15 14:11:29	-301.259	0.943	0.943	0
1945-11-15 14:13:08	-301.231	0.946	0.945	0.001
1945-11-15 14:13:57	-301.217	0.949	0.946	0.003
1945-11-15 14:16:26	-301.176	0.95	0.95	0
1945-11-15 14:18:06	-301.148	0.952	0.952	0
1945-11-15 14:18:55	-301.135	0.954	0.954	0.001
1945-11-15 14:19:44	-301.121	0.957	0.955	0.002
1945-11-15 14:20:33	-301.108	0.961	0.956	0.004
1945-11-15 14:21:22	-301.094	0.965	0.958	0.007
1945-11-15 14:22:11	-301.08	0.967	0.959	0.008
1945-11-15 14:23:50	-301.053	0.97	0.962	0.008
1945-11-15 14:25:29	-301.025	0.973	0.966	0.008
1945-11-15 14:27:08	-300.998	0.976	0.969	0.007
1945-11-15 14:28:47	-300.97	0.979	0.972	0.006
1945-11-15 14:30:26	-300.943	0.982	0.976	0.006
1945-11-15 14:31:15	-300.929	0.986	0.978	0.008
1945-11-15 14:32:54	-300.902	0.989	0.982	0.008
1945-11-15 14:34:33	-300.874	0.992	0.986	0.006
1945-11-15 14:35:22	-300.861	0.995	0.988	0.007
1945-11-15 14:36:11	-300.847	0.998	0.99	0.008
1945-11-15 14:37:50	-300.819	1.001	0.994	0.007
1945-11-15 14:38:39	-300.806	1.004	0.996	0.008
1945-11-15 14:39:28	-300.792	1.008	0.998	0.009
1945-11-15 14:41:57	-300.751	1.01	1.005	0.005
1945-11-15 14:43:37	-300.723	1.011	1.009	0.001
1945-11-15 14:45:16	-300.696	1.013	1.014	-0.001
1945-11-15 14:46:05	-300.682	1.017	1.017	0.001
1945-11-15 14:46:54	-300.668	1.02	1.019	0.001
1945-11-15 14:47:43	-300.655	1.023	1.021	0.002
1945-11-15 14:49:22	-300.627	1.027	1.026	0
1945-11-15 14:50:11	-300.614	1.03	1.029	0.001
1945-11-15 14:51:50	-300.586	1.033	1.034	-0.001
1945-11-15 14:52:39	-300.572	1.037	1.037	0.001
1945-11-15 14:53:28	-300.559	1.041	1.039	0.001
1945-11-15 14:54:16	-300.546	1.045	1.042	0.003
1945-11-15 14:55:06	-300.532	1.047	1.045	0.002
1945-11-15 14:55:55	-300.518	1.051	1.047	0.004
1945-11-15 14:57:34	-300.491	1.054	1.053	0.001
1945-11-15 14:59:13	-300.463	1.057	1.059	-0.002
1945-11-15 15:00:02	-300.449	1.06	1.061	-0.002
1945-11-15 15:01:41	-300.422	1.062	1.067	-0.005
1945-11-15 15:02:30	-300.408	1.066	1.07	-0.004
1945-11-15 15:04:09	-300.381	1.068	1.076	-0.008
1945-11-15 15:04:58	-300.367	1.072	1.079	-0.007
1945-11-15 15:05:47	-300.354	1.076	1.082	-0.006
1945-11-15 15:06:35	-300.34	1.083	1.085	-0.002
1945-11-15 15:06:36	-300.34	1.08	1.085	-0.005
1945-11-15 15:08:14	-300.313	1.086	1.091	-0.005
1945-11-15 15:09:02	-300.299	1.094	1.094	-0.001
1945-11-15 15:09:02	-300.299	1.092	1.094	-0.003
1945-11-15 15:10:41	-300.272	1.096	1.101	-0.005
1945-11-15 15:11:29	-300.259	1.103	1.104	0
1945-11-15 15:11:30	-300.258	1.099	1.104	-0.005
1945-11-15 15:12:18	-300.245	1.107	1.107	0
1945-11-15 15:13:05	-300.232	1.115	1.11	0.005
1945-11-15 15:13:06	-300.232	1.112	1.11	0.002
1945-11-15 15:13:54	-300.218	1.118	1.113	0.005
1945-11-15 15:15:33	-300.191	1.123	1.12	0.003
1945-11-15 15:16:22	-300.177	1.127	1.123	0.004
1945-11-15 15:17:11	-300.164	1.13	1.126	0.003
1945-11-15 15:18:00	-300.15	1.133	1.13	0.003
1945-11-15 15:19:39	-300.123	1.137	1.137	0.001
1945-11-15 15:20:27	-300.109	1.142	1.14	0.002
1945-11-15 15:21:16	-300.096	1.145	1.143	0.001
1945-11-15 15:22:05	-300.082	1.148	1.147	0.001
1945-11-15 15:23:44	-300.054	1.152	1.154	-0.002
1945-11-15 15:25:23	-300.027	1.157	1.161	-0.004
1945-11-15 15:26:11	-300.014	1.163	1.165	-0.002
1945-11-15 15:26:59	-300	1.168	1.168	0
1945-11-15 15:27:48	-299.987	1.174	1.172	0.002
1945-11-15 15:29:26	-299.959	1.178	1.179	-0.001
1945-11-15 15:30:15	-299.946	1.183	1.182	0.001
1945-11-15 15:31:54	-299.918	1.187	1.19	-0.002
1945-11-15 15:32:42	-299.905	1.193	1.193	-0.001
1945-11-15 15:34:20	-299.878	1.198	1.201	-0.003
1945-11-15 15:35:59	-299.85	1.203	1.209	-0.005
1945-11-15 15:37:37	-299.823	1.208	1.216	-0.008
1945-11-15 15:39:16	-299.796	1.212	1.224	-0.012
1945-11-15 15:40:05	-299.782	1.215	1.228	-0.012
1945-11-15 15:40:54	-299.768	1.217	1.232	-0.014
1945-11-15 15:42:33	-299.741	1.223	1.239	-0.017
1945-11-15 15:43:21	-299.728	1.228	1.243	-0.015
1945-11-15 15:45:00	-299.7	1.233	1.251	-0.018
1945-11-15 15:45:48	-299.687	1.238	1.255	-0.017
1945-11-15 15:46:37	-299.673	1.243	1.259	-0.016
1945-11-15 15:48:15	-299.646	1.248	1.267	-0.019
1945-11-15 15:49:04	-299.632	1.254	1.271	-0.017
1945-11-15 15:50:42	-299.605	1.258	1.279	-0.021
1945-11-15 15:51:31	-299.591	1.263	1.283	-0.02
1945-11-15 15:53:09	-299.564	1.268	1.291	-0.023
1945-11-15 15:53:58	-299.551	1.273	1.295	-0.023
1945-11-15 15:55:36	-299.523	1.278	1.304	-0.026
1945-11-15 15:56:25	-299.51	1.282	1.308	-0.025
1945-11-15 15:58:04	-299.482	1.285	1.316	-0.031
1945-11-15 15:58:53	-299.469	1.289	1.32	-0.032
1945-11-15 15:59:42	-299.455	1.294	1.324	-0.03
1945-11-15 16:00:30	-299.442	1.298	1.329	-0.03
1945-11-15 16:01:19	-299.428	1.304	1.333	-0.029
1945-11-15 16:02:07	-299.415	1.31	1.337	-0.027
1945-11-15 16:03:46	-299.387	1.314	1.345	-0.031
1945-11-15 16:04:34	-299.374	1.32	1.35	-0.03
1945-11-15 16:05:22	-299.361	1.326	1.354	-0.028
1945-11-15 16:07:00	-299.333	1.332	1.362	-0.03
1945-11-15 16:08:38	-299.306	1.34	1.371	-0.031
1945-11-15 16:11:05	-299.265	1.35	1.384	-0.033
1945-11-15 16:11:53	-299.252	1.359	1.388	-0.029
1945-11-15 16:13:32	-299.224	1.362	1.397	-0.035
1945-11-15 16:14:20	-299.211	1.366	1.401	-0.035
1945-11-15 16:15:59	-299.184	1.371	1.41	-0.039
1945-11-15 16:16:48	-299.17	1.375	1.414	-0.039
1945-11-15 16:18:26	-299.143	1.38	1.423	-0.043
1945-11-15 16:20:04	-299.116	1.386	1.432	-0.046
1945-11-15 16:20:52	-299.102	1.396	1.436	-0.04
1945-11-15 16:20:53	-299.102	1.391	1.436	-0.045
1945-11-15 16:21:40	-299.089	1.402	1.44	-0.039
1945-11-15 16:23:17	-299.062	1.41	1.449	-0.039
1945-11-15 16:24:55	-299.035	1.418	1.458	-0.04
1945-11-15 16:25:44	-299.021	1.423	1.462	-0.04
1945-11-15 16:26:32	-299.008	1.428	1.467	-0.039
1945-11-15 16:28:11	-298.98	1.433	1.476	-0.042
1945-11-15 16:28:58	-298.967	1.441	1.48	-0.039
1945-11-15 16:30:36	-298.94	1.449	1.489	-0.04
1945-11-15 16:32:13	-298.913	1.458	1.498	-0.04
1945-11-15 16:33:52	-298.886	1.462	1.507	-0.045
1945-11-15 16:34:40	-298.872	1.469	1.511	-0.043
1945-11-15 16:36:19	-298.845	1.474	1.52	-0.046
1945-11-15 16:37:07	-298.831	1.479	1.525	-0.046
1945-11-15 16:37:56	-298.818	1.484	1.529	-0.046
1945-11-15 16:38:44	-298.804	1.489	1.534	-0.045
1945-11-15 16:40:21	-298.777	1.5	1.543	-0.043
1945-11-15 16:40:23	-298.777	1.494	1.543	-0.049
1945-11-15 16:41:10	-298.764	1.505	1.547	-0.042
1945-11-15 16:41:58	-298.751	1.511	1.552	-0.04
1945-11-15 16:42:45	-298.738	1.522	1.556	-0.034
1945-11-15 16:42:47	-298.737	1.516	1.556	-0.041
1945-11-15 16:44:24	-298.71	1.525	1.565	-0.04
1945-11-15 16:45:12	-298.697	1.53	1.57	-0.039
1945-11-15 16:46:51	-298.669	1.536	1.579	-0.043
1945-11-15 16:47:39	-298.656	1.541	1.583	-0.042
1945-11-15 16:49:18	-298.628	1.546	1.592	-0.046
1945-11-15 16:50:06	-298.615	1.553	1.597	-0.044
1945-11-15 16:50:55	-298.601	1.556	1.601	-0.045
1945-11-15 16:51:43	-298.588	1.562	1.606	-0.043
1945-11-15 16:52:32	-298.574	1.567	1.61	-0.043
1945-11-15 16:53:20	-298.561	1.573	1.615	-0.042
1945-11-15 16:54:09	-298.548	1.577	1.619	-0.042
1945-11-15 16:54:57	-298.534	1.583	1.623	-0.041
1945-11-15 16:55:46	-298.521	1.588	1.628	-0.04
1945-11-15 16:56:34	-298.507	1.593	1.632	-0.039
1945-11-15 16:57:23	-298.494	1.599	1.637	-0.038
1945-11-15 16:58:11	-298.48	1.604	1.641	-0.037
1945-11-15 16:59:49	-298.453	1.609	1.65	-0.041
1945-11-15 17:01:27	-298.426	1.619	1.659	-0.041
1945-11-15 17:03:53	-298.385	1.629	1.673	-0.043
1945-11-15 17:05:31	-298.358	1.639	1.682	-0.043
1945-11-15 17:07:08	-298.331	1.65	1.691	-0.041
1945-11-15 17:09:34	-298.291	1.66	1.704	-0.044
1945-11-15 17:12:02	-298.249	1.67	1.717	-0.047
1945-11-15 17:13:39	-298.223	1.681	1.726	-0.046
1945-11-15 17:15:15	-298.196	1.691	1.735	-0.044
1945-11-15 17:16:52	-298.169	1.702	1.744	-0.042
1945-11-15 17:18:30	-298.142	1.711	1.752	-0.041
1945-11-15 17:20:56	-298.101	1.723	1.765	-0.042
1945-11-15 17:22:33	-298.074	1.733	1.774	-0.041
1945-11-15 17:24:11	-298.047	1.742	1.783	-0.04
1945-11-15 17:26:37	-298.006	1.753	1.796	-0.043
1945-11-15 17:29:04	-297.966	1.765	1.809	-0.044
1945-11-15 17:30:41	-297.939	1.774	1.817	-0.043
1945-11-15 17:33:08	-297.898	1.784	1.83	-0.046
1945-11-15 17:34:45	-297.871	1.795	1.838	-0.044
1945-11-15 17:36:22	-297.844	1.805	1.847	-0.041
1945-11-15 17:37:59	-297.817	1.815	1.855	-0.04
1945-11-15 17:40:26	-297.776	1.825	1.867	-0.042
1945-11-15 17:42:03	-297.749	1.836	1.875	-0.039
1945-11-15 17:43:40	-297.722	1.847	1.884	-0.037
1945-11-15 17:46:07	-297.681	1.856	1.896	-0.04
1945-11-15 17:47:44	-297.654	1.867	1.904	-0.037
1945-11-15 17:49:21	-297.627	1.878	1.912	-0.034
1945-11-15 17:50:58	-297.601	1.888	1.92	-0.031
1945-11-15 17:52:35	-297.574	1.898	1.928	-0.03
1945-11-15 17:54:12	-297.547	1.908	1.935	-0.027
1945-11-15 17:56:39	-297.506	1.919	1.947	-0.028
1945-11-15 17:57:26	-297.493	1.929	1.951	-0.022
1945-11-15 17:59:03	-297.466	1.939	1.958	-0.019
1945-11-15 18:00:40	-297.439	1.95	1.966	-0.016
1945-11-15 18:02:17	-297.412	1.961	1.973	-0.013
1945-11-15 18:03:54	-297.385	1.971	1.981	-0.009
1945-11-15 18:06:20	-297.344	1.986	1.992	-0.005
1945-11-15 18:06:21	-297.344	1.982	1.992	-0.01
1945-11-15 18:07:08	-297.331	1.99	1.995	-0.005
1945-11-15 18:08:46	-297.304	1.998	2.003	-0.005
1945-11-15 18:09:35	-297.29	2.002	2.006	-0.004
1945-11-15 18:11:13	-297.263	2.009	2.013	-0.005
1945-11-15 18:12:02	-297.249	2.013	2.017	-0.004
1945-11-15 18:12:50	-297.236	2.018	2.02	-0.002
1945-11-15 18:14:29	-297.209	2.022	2.027	-0.005
1945-11-15 18:15:17	-297.195	2.029	2.031	-0.002
1945-11-15 18:16:05	-297.182	2.035	2.034	0.001
1945-11-15 18:17:43	-297.155	2.044	2.041	0.003
1945-11-15 18:21:00	-297.1	2.053	2.055	-0.001
1945-11-15 18:22:37	-297.073	2.063	2.061	0.002
1945-11-15 18:25:54	-297.018	2.074	2.074	-0.001
1945-11-15 18:28:21	-296.978	2.083	2.084	0
1945-11-15 18:29:59	-296.95	2.088	2.09	-0.001
1945-11-15 18:31:38	-296.923	2.094	2.096	-0.002
1945-11-15 18:33:15	-296.896	2.102	2.102	0
1945-11-15 18:35:44	-296.854	2.108	2.111	-0.003
1945-11-15 18:38:12	-296.813	2.113	2.119	-0.006
1945-11-15 18:40:40	-296.772	2.117	2.128	-0.011
1945-11-15 18:42:19	-296.745	2.123	2.133	-0.011
1945-11-15 18:43:57	-296.717	2.129	2.139	-0.01
1945-11-15 18:44:46	-296.704	2.132	2.141	-0.009
1945-11-15 18:45:34	-296.691	2.139	2.144	-0.005
1945-11-15 18:48:02	-296.649	2.144	2.152	-0.008
1945-11-15 18:48:51	-296.636	2.148	2.154	-0.006
1945-11-15 18:50:30	-296.608	2.152	2.159	-0.007
1945-11-15 18:52:08	-296.581	2.158	2.164	-0.006
1945-11-15 18:53:47	-296.554	2.162	2.169	-0.007
1945-11-15 18:56:14	-296.513	2.173	2.175	-0.003
1945-11-15 18:59:31	-296.458	2.182	2.184	-0.002
1945-11-15 19:01:58	-296.417	2.192	2.19	0.002
1945-11-15 19:05:15	-296.363	2.202	2.198	0.004
1945-11-15 19:08:32	-296.308	2.212	2.205	0.007
1945-11-15 19:11:49	-296.253	2.222	2.212	0.009
1945-11-15 19:15:56	-296.184	2.231	2.22	0.011
1945-11-15 19:20:02	-296.116	2.241	2.227	0.014
1945-11-15 19:25:50	-296.019	2.248	2.235	0.013
1945-11-15 19:31:37	-295.923	2.256	2.241	0.014
1945-11-15 19:38:15	-295.812	2.261	2.246	0.014
1945-11-15 19:40:44	-295.771	2.263	2.248	0.015
1945-11-15 19:45:44	-295.688	2.263	2.249	0.014
1945-11-15 19:54:03	-295.549	2.263	2.248	0.015
1945-11-15 19:56:34	-295.507	2.258	2.246	0.011
1945-11-15 19:59:54	-295.452	2.257	2.244	0.013
1945-11-15 20:02:25	-295.41	2.252	2.242	0.011
1945-11-15 20:06:35	-295.34	2.249	2.237	0.012
1945-11-15 20:09:06	-295.298	2.246	2.234	0.012
1945-11-15 20:11:37	-295.256	2.242	2.231	0.011
1945-11-15 20:15:48	-295.187	2.233	2.224	0.01
1945-11-15 20:20:01	-295.116	2.224	2.216	0.008
1945-11-15 20:24:12	-295.047	2.215	2.207	0.008
1945-11-15 20:26:44	-295.004	2.209	2.201	0.007
1945-11-15 20:28:24	-294.977	2.208	2.197	0.01
1945-11-15 20:29:14	-294.963	2.206	2.195	0.01
1945-11-15 20:31:46	-294.921	2.199	2.189	0.01
1945-11-15 20:34:17	-294.879	2.193	2.182	0.011
1945-11-15 20:36:00	-294.85	2.183	2.178	0.006
1945-11-15 20:37:40	-294.822	2.18	2.173	0.007
1945-11-15 20:39:21	-294.794	2.176	2.168	0.008
1945-11-15 20:39:22	-294.794	2.173	2.168	0.005
1945-11-15 20:40:13	-294.78	2.169	2.165	0.004
1945-11-15 20:41:54	-294.752	2.166	2.16	0.006
1945-11-15 20:42:45	-294.738	2.162	2.157	0.004
1945-11-15 20:43:35	-294.724	2.16	2.155	0.005
1945-11-15 20:44:26	-294.709	2.156	2.152	0.003
1945-11-15 20:46:07	-294.681	2.151	2.147	0.005
1945-11-15 20:48:38	-294.639	2.147	2.138	0.009
1945-11-15 20:49:30	-294.625	2.141	2.135	0.005
1945-11-15 20:51:11	-294.597	2.136	2.13	0.007
1945-11-15 20:53:43	-294.555	2.127	2.121	0.006
1945-11-15 20:56:15	-294.512	2.117	2.111	0.006
1945-11-15 20:58:48	-294.47	2.107	2.102	0.005
1945-11-15 21:00:30	-294.442	2.097	2.095	0.002
1945-11-15 21:03:53	-294.385	2.086	2.082	0.004
1945-11-15 21:06:25	-294.343	2.077	2.072	0.005
1945-11-15 21:09:48	-294.287	2.066	2.058	0.008
1945-11-15 21:13:10	-294.231	2.056	2.043	0.013
1945-11-15 21:15:42	-294.188	2.047	2.032	0.015
1945-11-15 21:16:35	-294.174	2.037	2.028	0.009
1945-11-15 21:18:17	-294.145	2.03	2.021	0.009
1945-11-15 21:20:49	-294.103	2.021	2.009	0.012
1945-11-15 21:22:31	-294.075	2.011	2.002	0.009
1945-11-15 21:24:14	-294.046	2.002	1.994	0.009
1945-11-15 21:25:55	-294.018	1.995	1.986	0.009
1945-11-15 21:27:38	-293.989	1.985	1.977	0.008
1945-11-15 21:29:20	-293.961	1.977	1.969	0.007
1945-11-15 21:31:53	-293.919	1.964	1.957	0.007
1945-11-15 21:34:26	-293.876	1.953	1.944	0.009
1945-11-15 21:35:18	-293.862	1.944	1.94	0.003
1945-11-15 21:37:51	-293.819	1.933	1.927	0.006
1945-11-15 21:39:34	-293.791	1.922	1.919	0.004
1945-11-15 21:42:06	-293.748	1.912	1.906	0.006
1945-11-15 21:43:49	-293.72	1.902	1.897	0.005
1945-11-15 21:44:41	-293.705	1.891	1.893	-0.001
1945-11-15 21:47:14	-293.663	1.881	1.879	0.002
1945-11-15 21:49:47	-293.62	1.87	1.866	0.004
1945-11-15 21:51:29	-293.592	1.861	1.857	0.004
1945-11-15 21:53:12	-293.563	1.85	1.848	0.002
1945-11-15 21:54:54	-293.535	1.839	1.839	0.001
1945-11-15 21:57:27	-293.493	1.83	1.825	0.005
1945-11-15 21:59:09	-293.464	1.82	1.816	0.005
1945-11-15 22:00:51	-293.436	1.814	1.806	0.007
1945-11-15 22:03:23	-293.394	1.803	1.792	0.011
1945-11-15 22:05:06	-293.365	1.793	1.783	0.011
1945-11-15 22:06:48	-293.337	1.783	1.773	0.009
1945-11-15 22:09:21	-293.294	1.773	1.759	0.014
1945-11-15 22:11:03	-293.266	1.764	1.75	0.014
1945-11-15 22:13:36	-293.223	1.753	1.735	0.018
1945-11-15 22:15:18	-293.195	1.743	1.726	0.017
1945-11-15 22:17:01	-293.166	1.733	1.716	0.017
1945-11-15 22:19:34	-293.124	1.721	1.702	0.019
1945-11-15 22:21:16	-293.096	1.713	1.692	0.02
1945-11-15 22:22:57	-293.067	1.706	1.683	0.024
1945-11-15 22:23:49	-293.053	1.7	1.678	0.022
1945-11-15 22:25:30	-293.025	1.695	1.668	0.027
1945-11-15 22:26:22	-293.011	1.689	1.663	0.026
1945-11-15 22:27:13	-292.996	1.684	1.658	0.026
1945-11-15 22:28:55	-292.968	1.676	1.648	0.028
1945-11-15 22:30:36	-292.94	1.67	1.639	0.031
1945-11-15 22:32:19	-292.911	1.661	1.629	0.032
1945-11-15 22:33:59	-292.884	1.658	1.619	0.039
1945-11-15 22:34:00	-292.883	1.654	1.619	0.035
1945-11-15 22:34:52	-292.869	1.648	1.614	0.033
1945-11-15 22:35:43	-292.855	1.643	1.609	0.034
1945-11-15 22:36:35	-292.84	1.637	1.605	0.032
1945-11-15 22:37:26	-292.826	1.633	1.6	0.033
1945-11-15 22:39:08	-292.798	1.623	1.59	0.033
1945-11-15 22:40:51	-292.769	1.613	1.58	0.033
1945-11-15 22:43:24	-292.727	1.602	1.565	0.036
1945-11-15 22:45:06	-292.698	1.591	1.556	0.035
1945-11-15 22:46:49	-292.67	1.582	1.546	0.036
1945-11-15 22:48:31	-292.641	1.571	1.536	0.035
1945-11-15 22:50:14	-292.613	1.56	1.526	0.034
1945-11-15 22:52:47	-292.57	1.55	1.512	0.038
1945-11-15 22:54:29	-292.542	1.54	1.502	0.038
1945-11-15 22:56:12	-292.513	1.529	1.492	0.037
1945-11-15 22:58:44	-292.471	1.519	1.478	0.041
1945-11-15 23:00:27	-292.442	1.508	1.468	0.04
1945-11-15 23:02:10	-292.414	1.498	1.459	0.04
1945-11-15 23:03:52	-292.386	1.488	1.449	0.039
1945-11-15 23:05:35	-292.357	1.477	1.44	0.038
1945-11-15 23:07:18	-292.328	1.466	1.43	0.036
1945-11-15 23:09:50	-292.286	1.457	1.416	0.041
1945-11-15 23:10:43	-292.271	1.446	1.411	0.035
1945-11-15 23:12:25	-292.243	1.436	1.402	0.034
1945-11-15 23:14:08	-292.214	1.425	1.392	0.033
1945-11-15 23:15:51	-292.186	1.414	1.383	0.031
1945-11-15 23:17:34	-292.157	1.404	1.374	0.03
1945-11-15 23:18:25	-292.143	1.398	1.369	0.029
1945-11-15 23:19:15	-292.129	1.396	1.365	0.032
1945-11-15 23:20:56	-292.101	1.393	1.356	0.037
1945-11-15 23:20:57	-292.101	1.39	1.355	0.034
1945-11-15 23:21:48	-292.087	1.387	1.351	0.036
1945-11-15 23:22:39	-292.072	1.383	1.346	0.037
1945-11-15 23:23:30	-292.058	1.378	1.342	0.036
1945-11-15 23:24:21	-292.044	1.374	1.337	0.037
1945-11-15 23:24:22	-292.044	1.369	1.337	0.031
1945-11-15 23:26:04	-292.016	1.363	1.328	0.035
1945-11-15 23:26:55	-292.001	1.358	1.324	0.034
1945-11-15 23:27:46	-291.987	1.353	1.319	0.033
1945-11-15 23:30:19	-291.945	1.343	1.306	0.037
1945-11-15 23:32:01	-291.916	1.332	1.297	0.035
1945-11-15 23:32:54	-291.902	1.322	1.293	0.029
1945-11-15 23:35:27	-291.859	1.311	1.28	0.031
1945-11-15 23:36:19	-291.845	1.301	1.275	0.026
1945-11-15 23:38:52	-291.802	1.292	1.263	0.029
1945-11-15 23:39:44	-291.788	1.284	1.258	0.026
1945-11-15 23:41:25	-291.76	1.277	1.25	0.027
1945-11-15 23:43:07	-291.731	1.269	1.242	0.028
1945-11-15 23:43:59	-291.717	1.264	1.237	0.027
1945-11-15 23:44:50	-291.703	1.259	1.233	0.026
1945-11-15 23:46:32	-291.674	1.249	1.225	0.024
1945-11-15 23:48:15	-291.646	1.239	1.217	0.022
1945-11-15 23:49:57	-291.618	1.229	1.209	0.02
1945-11-15 23:51:40	-291.589	1.219	1.201	0.019
1945-11-15 23:53:22	-291.561	1.21	1.193	0.017
1945-11-15 23:55:05	-291.532	1.2	1.185	0.015
1945-11-15 23:56:47	-291.504	1.192	1.177	0.014
1945-11-15 23:58:29	-291.475	1.184	1.17	0.014
1945-11-15 23:59:20	-291.461	1.18	1.166	0.014
1945-11-16 00:00:11	-291.447	1.175	1.162	0.012
1945-11-16 00:01:02	-291.433	1.17	1.159	0.012
1945-11-16 00:02:44	-291.404	1.164	1.151	0.013
1945-11-16 00:04:26	-291.376	1.153	1.144	0.009
1945-11-16 00:06:59	-291.334	1.144	1.133	0.01
1945-11-16 00:09:31	-291.291	1.133	1.123	0.01
1945-11-16 00:12:54	-291.235	1.124	1.109	0.014
1945-11-16 00:14:36	-291.207	1.114	1.103	0.011
1945-11-16 00:17:07	-291.165	1.11	1.093	0.016
1945-11-16 00:19:38	-291.123	1.103	1.084	0.019
1945-11-16 00:21:21	-291.094	1.094	1.078	0.016
1945-11-16 00:23:03	-291.066	1.085	1.072	0.014
1945-11-16 00:25:35	-291.024	1.078	1.063	0.015
1945-11-16 00:28:07	-290.981	1.067	1.054	0.013
1945-11-16 00:30:39	-290.939	1.06	1.046	0.014
1945-11-16 00:32:20	-290.911	1.053	1.041	0.013
1945-11-16 00:34:02	-290.883	1.046	1.036	0.01
1945-11-16 00:35:44	-290.854	1.038	1.03	0.008
1945-11-16 00:37:25	-290.826	1.033	1.026	0.008
1945-11-16 00:39:07	-290.798	1.027	1.021	0.006
1945-11-16 00:40:48	-290.77	1.023	1.016	0.007
1945-11-16 00:42:28	-290.742	1.021	1.012	0.01
1945-11-16 00:44:09	-290.714	1.018	1.007	0.011
1945-11-16 00:45:50	-290.686	1.012	1.003	0.009
1945-11-16 00:47:31	-290.658	1.007	0.999	0.009
1945-11-16 00:50:02	-290.616	1.002	0.993	0.009
1945-11-16 00:50:53	-290.602	0.999	0.991	0.008
1945-11-16 00:51:44	-290.588	0.997	0.989	0.007
1945-11-16 00:55:05	-290.532	0.989	0.982	0.007
1945-11-16 00:56:46	-290.504	0.985	0.979	0.006
1945-11-16 00:57:37	-290.49	0.981	0.978	0.003
1945-11-16 00:59:18	-290.462	0.979	0.975	0.004
1945-11-16 01:00:58	-290.434	0.976	0.972	0.004
1945-11-16 01:02:39	-290.406	0.971	0.969	0.002
1945-11-16 01:05:10	-290.364	0.968	0.965	0.003
1945-11-16 01:06:50	-290.336	0.967	0.963	0.004
1945-11-16 01:07:41	-290.322	0.963	0.962	0.001
1945-11-16 01:09:22	-290.294	0.96	0.96	0
1945-11-16 01:11:52	-290.252	0.956	0.957	-0.001
1945-11-16 01:13:33	-290.224	0.955	0.956	0
1945-11-16 01:15:13	-290.196	0.953	0.954	-0.001
1945-11-16 01:16:54	-290.168	0.95	0.953	-0.003
1945-11-16 01:17:44	-290.154	0.948	0.952	-0.005
1945-11-16 01:18:34	-290.141	0.947	0.952	-0.005
1945-11-16 01:20:14	-290.113	0.946	0.951	-0.005
1945-11-16 01:22:45	-290.071	0.944	0.95	-0.007
1945-11-16 01:24:24	-290.043	0.946	0.95	-0.004
1945-11-16 01:26:04	-290.016	0.946	0.949	-0.004
1945-11-16 01:28:33	-289.974	0.947	0.949	-0.003
1945-11-16 01:30:13	-289.946	0.948	0.95	-0.002
1945-11-16 01:31:52	-289.919	0.949	0.95	-0.001
1945-11-16 01:34:22	-289.877	0.948	0.951	-0.003
1945-11-16 01:36:02	-289.849	0.948	0.952	-0.004
1945-11-16 01:38:32	-289.808	0.947	0.954	-0.007
1945-11-16 01:40:12	-289.78	0.946	0.955	-0.009
1945-11-16 01:41:52	-289.752	0.946	0.957	-0.011
1945-11-16 01:43:32	-289.724	0.946	0.959	-0.013
1945-11-16 01:46:01	-289.683	0.948	0.962	-0.014
1945-11-16 01:47:40	-289.656	0.95	0.964	-0.014
1945-11-16 01:48:30	-289.642	0.952	0.965	-0.013
1945-11-16 01:49:19	-289.628	0.955	0.966	-0.011
1945-11-16 01:50:58	-289.601	0.957	0.969	-0.011
1945-11-16 01:53:27	-289.559	0.961	0.973	-0.012
1945-11-16 01:55:06	-289.532	0.964	0.976	-0.012
1945-11-16 01:56:45	-289.504	0.966	0.979	-0.013
1945-11-16 01:57:34	-289.491	0.968	0.981	-0.013
1945-11-16 01:58:23	-289.477	0.971	0.982	-0.011
1945-11-16 02:00:02	-289.449	0.974	0.986	-0.011
1945-11-16 02:01:41	-289.422	0.978	0.99	-0.012
1945-11-16 02:03:20	-289.394	0.981	0.993	-0.013
1945-11-16 02:04:59	-289.367	0.984	0.997	-0.013
1945-11-16 02:06:38	-289.339	0.987	1.002	-0.014
1945-11-16 02:08:17	-289.312	0.99	1.006	-0.016
1945-11-16 02:09:55	-289.285	0.996	1.01	-0.015
1945-11-16 02:11:33	-289.257	1.002	1.015	-0.013
1945-11-16 02:13:12	-289.23	1.006	1.02	-0.013
1945-11-16 02:14:51	-289.202	1.011	1.025	-0.014
1945-11-16 02:17:19	-289.161	1.015	1.032	-0.017
1945-11-16 02:18:08	-289.148	1.02	1.035	-0.015
1945-11-16 02:20:36	-289.107	1.025	1.043	-0.018
1945-11-16 02:22:15	-289.079	1.03	1.049	-0.019
1945-11-16 02:23:53	-289.052	1.034	1.054	-0.02
1945-11-16 02:25:32	-289.024	1.039	1.06	-0.021
1945-11-16 02:27:10	-288.997	1.045	1.066	-0.021
1945-11-16 02:27:58	-288.984	1.051	1.069	-0.018
1945-11-16 02:28:46	-288.971	1.058	1.072	-0.015
1945-11-16 02:30:25	-288.943	1.062	1.078	-0.017
1945-11-16 02:32:04	-288.916	1.065	1.085	-0.02
1945-11-16 02:32:52	-288.902	1.071	1.088	-0.017
1945-11-16 02:33:41	-288.889	1.077	1.091	-0.014
1945-11-16 02:35:18	-288.862	1.085	1.098	-0.012
1945-11-16 02:36:56	-288.834	1.094	1.104	-0.011
1945-11-16 02:38:34	-288.807	1.099	1.111	-0.012
1945-11-16 02:39:23	-288.794	1.104	1.115	-0.01
1945-11-16 02:41:02	-288.766	1.108	1.122	-0.014
1945-11-16 02:41:49	-288.753	1.115	1.125	-0.01
1945-11-16 02:42:38	-288.739	1.118	1.129	-0.011
1945-11-16 02:44:15	-288.712	1.129	1.136	-0.007
1945-11-16 02:45:52	-288.686	1.14	1.143	-0.004
1945-11-16 02:48:19	-288.645	1.149	1.155	-0.006
1945-11-16 02:49:06	-288.632	1.16	1.158	0.001
1945-11-16 02:51:33	-288.591	1.17	1.17	0
1945-11-16 02:54:00	-288.55	1.18	1.182	-0.002
1945-11-16 02:54:47	-288.537	1.191	1.186	0.005
1945-11-16 02:57:14	-288.496	1.201	1.198	0.003
1945-11-16 02:58:51	-288.469	1.212	1.206	0.006
1945-11-16 03:01:18	-288.428	1.222	1.219	0.003
1945-11-16 03:02:07	-288.415	1.226	1.223	0.003
1945-11-16 03:03:46	-288.387	1.231	1.231	0
1945-11-16 03:04:35	-288.374	1.234	1.236	-0.001
1945-11-16 03:05:22	-288.361	1.245	1.24	0.005
1945-11-16 03:06:10	-288.347	1.249	1.244	0.005
1945-11-16 03:06:58	-288.334	1.257	1.249	0.008
1945-11-16 03:08:36	-288.307	1.264	1.257	0.007
1945-11-16 03:10:14	-288.279	1.269	1.266	0.003
1945-11-16 03:11:03	-288.266	1.275	1.271	0.004
1945-11-16 03:11:51	-288.252	1.28	1.275	0.005
1945-11-16 03:13:30	-288.225	1.285	1.284	0.001
1945-11-16 03:14:18	-288.212	1.291	1.289	0.002
1945-11-16 03:15:07	-288.198	1.295	1.294	0.001
1945-11-16 03:15:55	-288.185	1.3	1.298	0.002
1945-11-16 03:17:33	-288.158	1.307	1.307	-0.001
1945-11-16 03:18:22	-288.144	1.311	1.312	-0.001
1945-11-16 03:19:11	-288.13	1.315	1.317	-0.002
1945-11-16 03:19:57	-288.118	1.328	1.321	0.007
1945-11-16 03:19:59	-288.117	1.322	1.321	0
1945-11-16 03:20:46	-288.104	1.332	1.326	0.006
1945-11-16 03:23:13	-288.063	1.342	1.34	0.001
1945-11-16 03:25:40	-288.022	1.353	1.355	-0.002
1945-11-16 03:26:27	-288.009	1.363	1.36	0.004
1945-11-16 03:27:14	-287.996	1.374	1.364	0.009
1945-11-16 03:28:01	-287.983	1.386	1.369	0.016
1945-11-16 03:30:28	-287.942	1.394	1.384	0.01
1945-11-16 03:32:55	-287.901	1.405	1.399	0.006
1945-11-16 03:33:42	-287.888	1.415	1.404	0.012
1945-11-16 03:35:19	-287.861	1.426	1.414	0.012
1945-11-16 03:36:08	-287.848	1.431	1.419	0.012
1945-11-16 03:37:46	-287.821	1.438	1.429	0.009
1945-11-16 03:38:33	-287.808	1.447	1.434	0.013
1945-11-16 03:40:11	-287.78	1.454	1.444	0.009
1945-11-16 03:40:58	-287.767	1.466	1.449	0.017
1945-11-16 03:41:46	-287.754	1.472	1.455	0.017
1945-11-16 03:42:35	-287.74	1.476	1.46	0.016
1945-11-16 03:44:11	-287.714	1.489	1.47	0.019
1945-11-16 03:45:48	-287.687	1.498	1.48	0.018
1945-11-16 03:47:26	-287.659	1.508	1.491	0.017
1945-11-16 03:49:52	-287.619	1.52	1.507	0.013
1945-11-16 03:51:29	-287.592	1.529	1.518	0.012
1945-11-16 03:53:56	-287.551	1.54	1.534	0.006
1945-11-16 03:55:33	-287.524	1.551	1.544	0.006
1945-11-16 03:56:20	-287.511	1.561	1.55	0.012
1945-11-16 03:57:07	-287.498	1.571	1.555	0.016
1945-11-16 03:58:44	-287.471	1.583	1.566	0.017
1945-11-16 03:59:32	-287.458	1.59	1.571	0.019
1945-11-16 04:00:20	-287.444	1.597	1.576	0.021
1945-11-16 04:01:06	-287.432	1.611	1.582	0.03
1945-11-16 04:01:53	-287.419	1.623	1.587	0.036
1945-11-16 04:03:30	-287.392	1.634	1.598	0.036
1945-11-16 04:05:57	-287.351	1.642	1.614	0.028
1945-11-16 04:06:44	-287.338	1.653	1.62	0.033
1945-11-16 04:08:21	-287.311	1.664	1.631	0.033
1945-11-16 04:09:58	-287.284	1.674	1.642	0.032
1945-11-16 04:11:35	-287.257	1.685	1.653	0.032
1945-11-16 04:12:22	-287.244	1.695	1.658	0.037
1945-11-16 04:13:09	-287.231	1.706	1.664	0.042
1945-11-16 04:14:46	-287.204	1.716	1.675	0.041
1945-11-16 04:15:33	-287.191	1.726	1.68	0.046
1945-11-16 04:17:10	-287.164	1.737	1.691	0.046
1945-11-16 04:19:37	-287.123	1.748	1.708	0.039
1945-11-16 04:21:14	-287.096	1.758	1.72	0.039
1945-11-16 04:22:01	-287.083	1.768	1.725	0.043
1945-11-16 04:23:38	-287.056	1.779	1.736	0.042
1945-11-16 04:24:25	-287.043	1.789	1.742	0.047
1945-11-16 04:26:02	-287.016	1.8	1.753	0.047
1945-11-16 04:27:39	-286.989	1.81	1.764	0.046
1945-11-16 04:29:16	-286.962	1.821	1.776	0.045
1945-11-16 04:30:53	-286.935	1.831	1.787	0.044
1945-11-16 04:32:30	-286.908	1.841	1.798	0.043
1945-11-16 04:34:57	-286.868	1.852	1.815	0.037
1945-11-16 04:35:46	-286.854	1.856	1.821	0.035
1945-11-16 04:36:34	-286.841	1.863	1.827	0.036
1945-11-16 04:38:11	-286.814	1.872	1.838	0.034
1945-11-16 04:39:48	-286.787	1.883	1.85	0.033
1945-11-16 04:41:25	-286.76	1.894	1.861	0.033
1945-11-16 04:43:02	-286.733	1.904	1.872	0.032
1945-11-16 04:44:39	-286.706	1.915	1.884	0.031
1945-11-16 04:46:16	-286.679	1.924	1.895	0.03
1945-11-16 04:48:43	-286.638	1.935	1.912	0.023
1945-11-16 04:49:30	-286.625	1.946	1.918	0.028
1945-11-16 04:50:17	-286.612	1.956	1.923	0.033
1945-11-16 04:51:04	-286.599	1.965	1.928	0.036
1945-11-16 04:52:43	-286.571	1.97	1.94	0.03
1945-11-16 04:53:31	-286.558	1.976	1.946	0.03
1945-11-16 04:54:20	-286.544	1.98	1.951	0.028
1945-11-16 04:55:58	-286.517	1.987	1.963	0.025
1945-11-16 04:56:46	-286.504	1.994	1.968	0.025
1945-11-16 04:58:25	-286.476	1.998	1.98	0.018
1945-11-16 05:00:02	-286.449	2.007	1.991	0.016
1945-11-16 05:02:29	-286.409	2.018	2.008	0.01
1945-11-16 05:03:17	-286.395	2.025	2.014	0.011
1945-11-16 05:04:06	-286.382	2.029	2.019	0.01
1945-11-16 05:05:43	-286.355	2.039	2.03	0.009
1945-11-16 05:06:31	-286.341	2.046	2.036	0.01
1945-11-16 05:07:20	-286.328	2.05	2.041	0.009
1945-11-16 05:08:07	-286.315	2.06	2.047	0.013
1945-11-16 05:09:44	-286.288	2.069	2.058	0.011
1945-11-16 05:11:22	-286.261	2.078	2.069	0.009
1945-11-16 05:13:00	-286.233	2.084	2.08	0.004
1945-11-16 05:14:36	-286.207	2.097	2.091	0.006
1945-11-16 05:14:37	-286.206	2.092	2.091	0
1945-11-16 05:15:24	-286.193	2.103	2.097	0.007
1945-11-16 05:17:02	-286.166	2.112	2.108	0.004
1945-11-16 05:17:50	-286.153	2.119	2.113	0.006
1945-11-16 05:18:38	-286.139	2.125	2.118	0.006
1945-11-16 05:20:16	-286.112	2.133	2.129	0.004
1945-11-16 05:21:04	-286.099	2.138	2.135	0.004
1945-11-16 05:21:52	-286.086	2.144	2.14	0.004
1945-11-16 05:23:30	-286.058	2.153	2.151	0.002
1945-11-16 05:25:57	-286.017	2.164	2.167	-0.003
1945-11-16 05:27:33	-285.991	2.175	2.178	-0.003
1945-11-16 05:29:11	-285.964	2.184	2.189	-0.004
1945-11-16 05:30:48	-285.937	2.194	2.199	-0.005
1945-11-16 05:32:25	-285.91	2.202	2.21	-0.007
1945-11-16 05:34:03	-285.882	2.21	2.22	-0.01
1945-11-16 05:34:51	-285.869	2.216	2.225	-0.009
1945-11-16 05:36:28	-285.842	2.227	2.236	-0.009
1945-11-16 05:38:06	-285.815	2.236	2.246	-0.01
1945-11-16 05:39:42	-285.788	2.247	2.256	-0.009
1945-11-16 05:42:09	-285.748	2.258	2.272	-0.014
1945-11-16 05:43:46	-285.721	2.268	2.282	-0.014
1945-11-16 05:45:23	-285.694	2.278	2.292	-0.014
1945-11-16 05:47:50	-285.653	2.289	2.307	-0.018
1945-11-16 05:48:38	-285.639	2.298	2.312	-0.014
1945-11-16 05:50:14	-285.613	2.31	2.322	-0.012
1945-11-16 05:51:51	-285.586	2.321	2.332	-0.011
1945-11-16 05:52:39	-285.572	2.33	2.336	-0.006
1945-11-16 05:53:26	-285.559	2.341	2.341	0
1945-11-16 05:55:02	-285.533	2.351	2.351	0.001
1945-11-16 05:58:19	-285.478	2.362	2.37	-0.008
1945-11-16 06:00:46	-285.437	2.372	2.384	-0.013
1945-11-16 06:03:13	-285.396	2.382	2.398	-0.016
1945-11-16 06:04:00	-285.383	2.393	2.403	-0.01
1945-11-16 06:05:37	-285.356	2.403	2.412	-0.009
1945-11-16 06:06:24	-285.343	2.413	2.416	-0.003
1945-11-16 06:08:01	-285.316	2.424	2.425	-0.001
1945-11-16 06:08:49	-285.303	2.433	2.43	0.004
1945-11-16 06:11:15	-285.262	2.445	2.443	0.002
1945-11-16 06:12:52	-285.236	2.455	2.452	0.003
1945-11-16 06:15:19	-285.195	2.465	2.465	0.001
1945-11-16 06:17:46	-285.154	2.476	2.478	-0.002
1945-11-16 06:20:13	-285.113	2.486	2.49	-0.005
1945-11-16 06:22:40	-285.072	2.496	2.503	-0.006
1945-11-16 06:25:07	-285.031	2.506	2.515	-0.009
1945-11-16 06:27:34	-284.991	2.517	2.527	-0.01
1945-11-16 06:30:01	-284.95	2.526	2.538	-0.012
1945-11-16 06:32:28	-284.909	2.537	2.55	-0.013
1945-11-16 06:34:55	-284.868	2.546	2.561	-0.015
1945-11-16 06:37:22	-284.827	2.557	2.572	-0.015
1945-11-16 06:39:49	-284.786	2.568	2.583	-0.015
1945-11-16 06:41:26	-284.759	2.576	2.589	-0.013
1945-11-16 06:43:53	-284.719	2.587	2.6	-0.013
1945-11-16 06:46:20	-284.678	2.597	2.61	-0.012
1945-11-16 06:48:47	-284.637	2.607	2.619	-0.012
1945-11-16 06:52:54	-284.568	2.618	2.635	-0.017
1945-11-16 06:54:31	-284.541	2.626	2.641	-0.014
1945-11-16 06:58:38	-284.473	2.638	2.655	-0.017
1945-11-16 07:01:55	-284.418	2.646	2.666	-0.019
1945-11-16 07:06:02	-284.349	2.656	2.678	-0.022
1945-11-16 07:10:59	-284.267	2.666	2.692	-0.027
1945-11-16 07:14:16	-284.212	2.675	2.701	-0.025
1945-11-16 07:18:23	-284.144	2.684	2.71	-0.027
1945-11-16 07:22:30	-284.075	2.693	2.719	-0.026
1945-11-16 07:26:37	-284.006	2.703	2.727	-0.024
1945-11-16 07:29:54	-283.952	2.712	2.732	-0.02
1945-11-16 07:34:51	-283.869	2.721	2.739	-0.018
1945-11-16 07:38:08	-283.814	2.731	2.743	-0.012
1945-11-16 07:42:15	-283.746	2.74	2.746	-0.006
1945-11-16 07:46:23	-283.677	2.748	2.748	-0.001
1945-11-16 07:49:41	-283.622	2.751	2.749	0.001
1945-11-16 07:53:50	-283.553	2.753	2.75	0.003
1945-11-16 07:57:10	-283.497	2.753	2.749	0.004
1945-11-16 07:59:40	-283.456	2.752	2.748	0.004
1945-11-16 08:04:40	-283.372	2.751	2.744	0.007
1945-11-16 08:08:49	-283.303	2.751	2.739	0.012
1945-11-16 08:12:10	-283.247	2.749	2.734	0.014
1945-11-16 08:13:50	-283.219	2.744	2.732	0.013
1945-11-16 08:16:21	-283.178	2.74	2.727	0.013
1945-11-16 08:18:52	-283.136	2.737	2.723	0.014
1945-11-16 08:23:02	-283.066	2.734	2.714	0.02
1945-11-16 08:24:43	-283.038	2.73	2.71	0.02
1945-11-16 08:27:14	-282.996	2.725	2.704	0.022
1945-11-16 08:31:26	-282.926	2.716	2.692	0.023
1945-11-16 08:33:57	-282.884	2.712	2.685	0.028
1945-11-16 08:35:38	-282.856	2.707	2.68	0.027
1945-11-16 08:39:01	-282.8	2.697	2.669	0.027
1945-11-16 08:42:23	-282.744	2.687	2.658	0.029
1945-11-16 08:44:05	-282.715	2.677	2.652	0.026
1945-11-16 08:46:38	-282.673	2.667	2.642	0.025
1945-11-16 08:49:11	-282.63	2.656	2.632	0.024
1945-11-16 08:52:33	-282.574	2.646	2.619	0.028
1945-11-16 08:53:25	-282.56	2.637	2.615	0.022
1945-11-16 08:56:48	-282.503	2.626	2.601	0.025
1945-11-16 08:58:31	-282.475	2.616	2.593	0.022
1945-11-16 09:01:53	-282.419	2.605	2.578	0.027
1945-11-16 09:03:35	-282.39	2.595	2.57	0.025
1945-11-16 09:06:08	-282.348	2.585	2.558	0.026
1945-11-16 09:07:51	-282.319	2.574	2.55	0.024
1945-11-16 09:09:33	-282.291	2.564	2.542	0.023
1945-11-16 09:11:16	-282.262	2.554	2.533	0.021
1945-11-16 09:13:49	-282.22	2.543	2.52	0.023
1945-11-16 09:15:31	-282.191	2.533	2.511	0.022
1945-11-16 09:17:14	-282.163	2.522	2.502	0.02
1945-11-16 09:18:56	-282.134	2.512	2.493	0.02
1945-11-16 09:20:39	-282.106	2.502	2.483	0.018
1945-11-16 09:22:22	-282.077	2.491	2.474	0.017
1945-11-16 09:23:15	-282.062	2.48	2.469	0.011
1945-11-16 09:24:57	-282.034	2.47	2.459	0.01
1945-11-16 09:26:40	-282.006	2.46	2.449	0.011
1945-11-16 09:29:12	-281.963	2.449	2.435	0.015
1945-11-16 09:30:55	-281.935	2.439	2.425	0.014
1945-11-16 09:32:38	-281.906	2.428	2.414	0.014
1945-11-16 09:34:20	-281.878	2.419	2.404	0.015
1945-11-16 09:36:03	-281.849	2.408	2.393	0.014
1945-11-16 09:37:45	-281.821	2.397	2.383	0.014
1945-11-16 09:38:38	-281.806	2.387	2.377	0.009
1945-11-16 09:40:21	-281.777	2.376	2.367	0.009
1945-11-16 09:42:04	-281.749	2.365	2.356	0.009
1945-11-16 09:43:46	-281.721	2.356	2.345	0.011
1945-11-16 09:44:39	-281.706	2.345	2.339	0.006
1945-11-16 09:46:22	-281.677	2.334	2.328	0.006
1945-11-16 09:48:04	-281.649	2.324	2.317	0.007
1945-11-16 09:48:57	-281.634	2.313	2.311	0.002
1945-11-16 09:49:50	-281.619	2.304	2.305	-0.002
1945-11-16 09:50:43	-281.605	2.292	2.299	-0.008
1945-11-16 09:51:35	-281.59	2.281	2.294	-0.012
1945-11-16 09:53:18	-281.562	2.271	2.282	-0.012
1945-11-16 09:53:21	-281.561	2.26	2.282	-0.022
1945-11-16 09:55:04	-281.532	2.249	2.27	-0.021
1945-11-16 09:55:56	-281.518	2.24	2.264	-0.025
1945-11-16 09:56:49	-281.503	2.229	2.258	-0.029
1945-11-16 09:58:32	-281.474	2.218	2.246	-0.028
1945-11-16 10:00:14	-281.446	2.208	2.235	-0.027
1945-11-16 10:01:57	-281.418	2.197	2.223	-0.026
1945-11-16 10:03:40	-281.389	2.186	2.21	-0.024
1945-11-16 10:05:22	-281.361	2.177	2.198	-0.022
1945-11-16 10:07:05	-281.332	2.166	2.186	-0.02
1945-11-16 10:08:48	-281.303	2.155	2.174	-0.018
1945-11-16 10:10:30	-281.275	2.145	2.162	-0.017
1945-11-16 10:12:13	-281.246	2.134	2.149	-0.015
1945-11-16 10:13:56	-281.218	2.125	2.137	-0.012
1945-11-16 10:16:28	-281.176	2.113	2.118	-0.005
1945-11-16 10:18:11	-281.147	2.103	2.105	-0.002
1945-11-16 10:19:54	-281.118	2.093	2.093	0
1945-11-16 10:21:36	-281.09	2.082	2.08	0.002
1945-11-16 10:23:19	-281.061	2.072	2.067	0.005
1945-11-16 10:24:11	-281.047	2.062	2.06	0.001
1945-11-16 10:25:54	-281.018	2.051	2.047	0.004
1945-11-16 10:27:37	-280.99	2.04	2.034	0.006
1945-11-16 10:29:20	-280.961	2.03	2.021	0.008
1945-11-16 10:31:02	-280.933	2.02	2.008	0.012
1945-11-16 10:32:45	-280.904	2.01	1.995	0.014
1945-11-16 10:34:27	-280.876	1.999	1.982	0.017
1945-11-16 10:36:10	-280.847	1.988	1.969	0.019
1945-11-16 10:37:53	-280.819	1.978	1.955	0.022
1945-11-16 10:38:46	-280.804	1.967	1.949	0.018
1945-11-16 10:40:28	-280.776	1.957	1.935	0.022
1945-11-16 10:41:21	-280.761	1.947	1.928	0.018
1945-11-16 10:42:14	-280.746	1.936	1.922	0.015
1945-11-16 10:44:46	-280.704	1.925	1.902	0.024
1945-11-16 10:45:39	-280.689	1.915	1.895	0.02
1945-11-16 10:46:32	-280.674	1.904	1.888	0.016
1945-11-16 10:48:14	-280.646	1.894	1.874	0.019
1945-11-16 10:49:07	-280.631	1.883	1.867	0.015
1945-11-16 10:50:50	-280.603	1.872	1.854	0.018
1945-11-16 10:51:42	-280.588	1.863	1.847	0.016
1945-11-16 10:53:25	-280.56	1.852	1.833	0.019
1945-11-16 10:54:18	-280.545	1.841	1.826	0.015
1945-11-16 10:56:01	-280.516	1.831	1.813	0.018
1945-11-16 10:56:53	-280.502	1.82	1.806	0.014
1945-11-16 10:57:46	-280.487	1.809	1.799	0.011
1945-11-16 10:58:39	-280.473	1.799	1.792	0.007
1945-11-16 10:59:32	-280.458	1.788	1.785	0.003
1945-11-16 11:01:15	-280.429	1.777	1.771	0.006
1945-11-16 11:02:08	-280.414	1.766	1.764	0.002
1945-11-16 11:03:00	-280.4	1.757	1.757	0
1945-11-16 11:03:51	-280.386	1.752	1.75	0.002
1945-11-16 11:04:43	-280.371	1.745	1.743	0.002
1945-11-16 11:05:34	-280.357	1.741	1.736	0.005
1945-11-16 11:07:16	-280.329	1.732	1.723	0.009
1945-11-16 11:08:08	-280.314	1.725	1.716	0.009
1945-11-16 11:09:49	-280.286	1.721	1.702	0.019
1945-11-16 11:10:42	-280.272	1.71	1.695	0.015
1945-11-16 11:11:35	-280.257	1.7	1.688	0.011
1945-11-16 11:12:27	-280.243	1.689	1.681	0.008
1945-11-16 11:13:20	-280.228	1.678	1.674	0.004
1945-11-16 11:14:12	-280.213	1.672	1.667	0.005
1945-11-16 11:15:03	-280.199	1.668	1.66	0.007
1945-11-16 11:16:46	-280.171	1.657	1.647	0.01
1945-11-16 11:17:38	-280.156	1.648	1.64	0.008
1945-11-16 11:20:11	-280.114	1.637	1.619	0.017
1945-11-16 11:21:03	-280.099	1.626	1.612	0.014
1945-11-16 11:22:46	-280.071	1.616	1.599	0.017
1945-11-16 11:24:29	-280.042	1.605	1.585	0.02
1945-11-16 11:26:12	-280.013	1.594	1.571	0.023
1945-11-16 11:27:04	-279.999	1.585	1.564	0.02
1945-11-16 11:27:57	-279.984	1.574	1.557	0.017
1945-11-16 11:28:50	-279.969	1.563	1.55	0.013
1945-11-16 11:29:43	-279.955	1.552	1.543	0.008
1945-11-16 11:30:35	-279.94	1.542	1.536	0.006
1945-11-16 11:32:18	-279.912	1.531	1.523	0.009
1945-11-16 11:34:51	-279.869	1.521	1.502	0.018
1945-11-16 11:35:43	-279.855	1.51	1.496	0.015
1945-11-16 11:36:36	-279.84	1.499	1.489	0.011
1945-11-16 11:37:29	-279.825	1.489	1.482	0.007
1945-11-16 11:38:21	-279.811	1.479	1.475	0.004
1945-11-16 11:40:54	-279.768	1.469	1.455	0.014
1945-11-16 11:42:37	-279.74	1.458	1.441	0.017
1945-11-16 11:44:19	-279.711	1.447	1.428	0.019
1945-11-16 11:46:02	-279.683	1.437	1.415	0.022
1945-11-16 11:46:55	-279.668	1.427	1.408	0.019
1945-11-16 11:48:37	-279.64	1.416	1.394	0.022
1945-11-16 11:49:30	-279.625	1.407	1.388	0.019
1945-11-16 11:51:11	-279.597	1.402	1.375	0.027
1945-11-16 11:52:03	-279.582	1.395	1.368	0.027
1945-11-16 11:52:56	-279.568	1.384	1.361	0.023
1945-11-16 11:53:48	-279.553	1.376	1.354	0.022
1945-11-16 12:10:57	-279.267	1.26	1.225	0.035
1945-11-16 12:11:50	-279.253	1.249	1.219	0.03
1945-11-16 12:12:43	-279.238	1.239	1.212	0.026
1945-11-16 12:14:26	-279.209	1.228	1.2	0.028
1945-11-16 12:16:08	-279.181	1.218	1.187	0.031
1945-11-16 12:17:01	-279.166	1.208	1.181	0.027
1945-11-16 12:19:34	-279.124	1.197	1.163	0.034
1945-11-16 12:20:26	-279.109	1.186	1.157	0.03
1945-11-16 12:22:09	-279.081	1.176	1.144	0.031
1945-11-16 12:23:02	-279.066	1.165	1.138	0.027
1945-11-16 12:24:45	-279.038	1.154	1.126	0.028
1945-11-16 12:25:37	-279.023	1.145	1.12	0.025
1945-11-16 12:26:30	-279.008	1.135	1.114	0.021
1945-11-16 12:29:52	-278.952	1.124	1.091	0.033
1945-11-16 12:30:45	-278.938	1.113	1.085	0.028
1945-11-16 12:31:38	-278.923	1.102	1.079	0.024
1945-11-16 12:31:39	-278.923	1.097	1.079	0.018
1945-11-16 12:32:31	-278.908	1.092	1.073	0.019
1945-11-16 12:34:12	-278.88	1.085	1.061	0.024
1945-11-16 12:35:05	-278.865	1.076	1.055	0.02
1945-11-16 12:35:56	-278.851	1.07	1.05	0.02
1945-11-16 12:37:39	-278.822	1.061	1.038	0.022
1945-11-16 12:38:31	-278.808	1.05	1.033	0.017
1945-11-16 12:40:14	-278.779	1.039	1.022	0.018
1945-11-16 12:41:57	-278.751	1.029	1.01	0.018
1945-11-16 12:43:39	-278.723	1.018	1	0.019
1945-11-16 12:43:42	-278.722	1.007	0.999	0.008
1945-11-16 12:45:25	-278.693	0.998	0.988	0.01
1945-11-16 12:46:17	-278.679	0.99	0.983	0.008
1945-11-16 12:47:58	-278.651	0.985	0.972	0.013
1945-11-16 12:48:50	-278.636	0.976	0.967	0.009
1945-11-16 12:50:33	-278.608	0.966	0.956	0.01
1945-11-16 12:53:55	-278.551	0.955	0.936	0.019
1945-11-16 12:54:48	-278.537	0.946	0.931	0.015
1945-11-16 12:57:20	-278.494	0.935	0.916	0.019
1945-11-16 12:59:03	-278.466	0.924	0.906	0.019
1945-11-16 13:00:46	-278.437	0.914	0.896	0.018
1945-11-16 13:02:28	-278.409	0.904	0.886	0.018
1945-11-16 13:04:09	-278.381	0.901	0.877	0.024
1945-11-16 13:05:01	-278.366	0.894	0.872	0.022
1945-11-16 13:05:53	-278.352	0.887	0.867	0.02
1945-11-16 13:06:44	-278.338	0.883	0.862	0.02
1945-11-16 13:08:26	-278.309	0.872	0.853	0.019
1945-11-16 13:10:09	-278.281	0.863	0.844	0.019
1945-11-16 13:11:02	-278.266	0.852	0.839	0.013
1945-11-16 13:12:43	-278.238	0.846	0.831	0.015
1945-11-16 13:13:36	-278.223	0.833	0.826	0.007
1945-11-16 13:16:09	-278.181	0.822	0.813	0.009
1945-11-16 13:17:52	-278.152	0.812	0.805	0.007
1945-11-16 13:19:34	-278.124	0.802	0.796	0.006
1945-11-16 13:21:17	-278.095	0.79	0.788	0.002
1945-11-16 13:23:00	-278.067	0.781	0.78	0.001
1945-11-16 13:25:32	-278.024	0.77	0.768	0.002
1945-11-16 13:27:15	-277.996	0.76	0.761	0
1945-11-16 13:28:57	-277.967	0.75	0.753	-0.004
1945-11-16 13:30:40	-277.939	0.739	0.746	-0.007
1945-11-16 13:33:12	-277.897	0.73	0.735	-0.006
1945-11-16 13:35:45	-277.854	0.719	0.725	-0.006
1945-11-16 13:38:18	-277.812	0.708	0.715	-0.007
1945-11-16 13:40:00	-277.783	0.699	0.709	-0.01
1945-11-16 13:43:22	-277.727	0.688	0.696	-0.008
1945-11-16 13:46:45	-277.671	0.678	0.685	-0.006
1945-11-16 13:49:17	-277.629	0.669	0.677	-0.008
1945-11-16 13:51:00	-277.6	0.658	0.671	-0.013
1945-11-16 13:55:12	-277.53	0.649	0.659	-0.01
1945-11-16 13:57:43	-277.488	0.644	0.652	-0.008
1945-11-16 13:59:24	-277.46	0.639	0.648	-0.009
1945-11-16 14:00:15	-277.446	0.634	0.646	-0.012
1945-11-16 14:01:56	-277.418	0.629	0.641	-0.012
1945-11-16 14:02:47	-277.404	0.625	0.64	-0.014
1945-11-16 14:04:28	-277.376	0.623	0.636	-0.013
1945-11-16 14:06:58	-277.334	0.622	0.63	-0.009
1945-11-16 14:08:39	-277.306	0.618	0.627	-0.01
1945-11-16 14:11:10	-277.264	0.612	0.623	-0.01
1945-11-16 14:12:01	-277.25	0.607	0.621	-0.014
1945-11-16 14:14:32	-277.208	0.603	0.617	-0.015
1945-11-16 14:16:13	-277.18	0.599	0.615	-0.016
1945-11-16 14:20:24	-277.11	0.595	0.61	-0.015
1945-11-16 14:28:43	-276.971	0.595	0.604	-0.008
1945-11-16 14:37:02	-276.833	0.595	0.603	-0.008
1945-11-16 14:40:21	-276.777	0.597	0.604	-0.007
1945-11-16 14:43:40	-276.722	0.601	0.606	-0.006
1945-11-16 14:46:09	-276.681	0.603	0.609	-0.006
1945-11-16 14:47:48	-276.653	0.606	0.61	-0.004
1945-11-16 14:50:16	-276.612	0.609	0.613	-0.004
1945-11-16 14:51:06	-276.598	0.612	0.615	-0.002
1945-11-16 14:53:35	-276.557	0.613	0.618	-0.005
1945-11-16 14:56:04	-276.516	0.616	0.622	-0.007
1945-11-16 14:56:54	-276.502	0.617	0.624	-0.007
1945-11-16 14:58:32	-276.474	0.621	0.627	-0.006
1945-11-16 15:00:11	-276.447	0.625	0.63	-0.005
1945-11-16 15:02:40	-276.406	0.629	0.635	-0.006
1945-11-16 15:03:28	-276.392	0.636	0.637	-0.001
1945-11-16 15:05:56	-276.351	0.64	0.643	-0.003
1945-11-16 15:07:36	-276.323	0.642	0.647	-0.005
1945-11-16 15:09:14	-276.296	0.646	0.652	-0.005
1945-11-16 15:10:53	-276.269	0.65	0.656	-0.006
1945-11-16 15:11:42	-276.255	0.655	0.658	-0.003
1945-11-16 15:14:10	-276.214	0.659	0.666	-0.006
1945-11-16 15:14:59	-276.2	0.665	0.668	-0.003
1945-11-16 15:18:17	-276.145	0.669	0.678	-0.01
1945-11-16 15:19:56	-276.118	0.673	0.684	-0.011
1945-11-16 15:21:34	-276.091	0.678	0.69	-0.011
1945-11-16 15:23:13	-276.063	0.683	0.695	-0.013
1945-11-16 15:24:01	-276.05	0.689	0.698	-0.009
1945-11-16 15:25:40	-276.022	0.693	0.704	-0.011
1945-11-16 15:27:18	-275.995	0.7	0.711	-0.011
1945-11-16 15:28:07	-275.981	0.703	0.714	-0.011
1945-11-16 15:29:45	-275.954	0.708	0.72	-0.012
1945-11-16 15:31:24	-275.927	0.712	0.727	-0.014
1945-11-16 15:32:12	-275.913	0.72	0.73	-0.01
1945-11-16 15:33:01	-275.9	0.724	0.734	-0.009
1945-11-16 15:35:28	-275.859	0.734	0.744	-0.01
1945-11-16 15:38:45	-275.804	0.743	0.758	-0.015
1945-11-16 15:39:33	-275.791	0.749	0.762	-0.013
1945-11-16 15:41:12	-275.763	0.753	0.77	-0.017
1945-11-16 15:42:50	-275.736	0.757	0.777	-0.02
1945-11-16 15:44:29	-275.709	0.764	0.785	-0.021
1945-11-16 15:45:17	-275.695	0.769	0.789	-0.02
1945-11-16 15:46:06	-275.682	0.773	0.793	-0.02
1945-11-16 15:46:54	-275.668	0.778	0.797	-0.018
1945-11-16 15:48:33	-275.641	0.784	0.805	-0.021
1945-11-16 15:49:20	-275.628	0.793	0.809	-0.016
1945-11-16 15:49:21	-275.627	0.789	0.809	-0.02
1945-11-16 15:50:08	-275.614	0.802	0.813	-0.011
1945-11-16 15:50:55	-275.601	0.809	0.817	-0.008
1945-11-16 15:52:34	-275.574	0.816	0.825	-0.01
1945-11-16 15:53:21	-275.561	0.824	0.83	-0.005
1945-11-16 15:54:09	-275.548	0.833	0.834	-0.001
1945-11-16 15:55:47	-275.52	0.839	0.842	-0.003
1945-11-16 15:57:24	-275.493	0.85	0.851	-0.001
1945-11-16 15:59:51	-275.452	0.859	0.865	-0.005
1945-11-16 16:02:18	-275.412	0.87	0.878	-0.008
1945-11-16 16:03:55	-275.385	0.881	0.888	-0.007
1945-11-16 16:04:42	-275.372	0.889	0.892	-0.003
1945-11-16 16:07:09	-275.331	0.901	0.906	-0.005
1945-11-16 16:08:46	-275.304	0.912	0.916	-0.004
1945-11-16 16:10:23	-275.277	0.922	0.926	-0.003
1945-11-16 16:12:00	-275.25	0.933	0.935	-0.002
1945-11-16 16:13:36	-275.223	0.944	0.945	-0.001
1945-11-16 16:14:24	-275.21	0.953	0.95	0.003
1945-11-16 16:15:12	-275.197	0.961	0.955	0.006
1945-11-16 16:17:40	-275.156	0.967	0.97	-0.003
1945-11-16 16:18:28	-275.142	0.973	0.975	-0.002
1945-11-16 16:20:05	-275.115	0.984	0.986	-0.002
1945-11-16 16:23:22	-275.061	0.995	1.007	-0.012
1945-11-16 16:24:09	-275.048	1.005	1.012	-0.006
1945-11-16 16:25:46	-275.021	1.015	1.022	-0.007
1945-11-16 16:27:23	-274.994	1.026	1.033	-0.007
1945-11-16 16:28:10	-274.981	1.036	1.038	-0.002
1945-11-16 16:29:47	-274.954	1.047	1.049	-0.002
1945-11-16 16:31:24	-274.927	1.058	1.06	-0.002
1945-11-16 16:33:01	-274.9	1.068	1.071	-0.003
1945-11-16 16:35:28	-274.859	1.078	1.088	-0.01
1945-11-16 16:37:05	-274.832	1.086	1.099	-0.012
1945-11-16 16:39:32	-274.791	1.096	1.116	-0.02
1945-11-16 16:41:09	-274.764	1.106	1.127	-0.021
1945-11-16 16:43:35	-274.724	1.119	1.144	-0.025
1945-11-16 16:44:23	-274.71	1.13	1.15	-0.02
1945-11-16 16:46:49	-274.67	1.141	1.167	-0.027
1945-11-16 16:47:37	-274.656	1.15	1.173	-0.023
1945-11-16 16:49:14	-274.629	1.161	1.185	-0.024
1945-11-16 16:50:51	-274.603	1.171	1.197	-0.025
1945-11-16 16:52:27	-274.576	1.182	1.208	-0.026
1945-11-16 16:53:14	-274.563	1.193	1.214	-0.021
1945-11-16 16:55:41	-274.522	1.203	1.232	-0.028
1945-11-16 16:57:19	-274.495	1.213	1.244	-0.031
1945-11-16 16:58:06	-274.482	1.224	1.25	-0.026
1945-11-16 16:59:42	-274.455	1.234	1.262	-0.027
1945-11-16 17:01:19	-274.428	1.245	1.274	-0.029
1945-11-16 17:02:56	-274.401	1.256	1.286	-0.03
1945-11-16 17:05:23	-274.36	1.265	1.304	-0.039
1945-11-16 17:07:50	-274.319	1.276	1.323	-0.047
1945-11-16 17:09:27	-274.293	1.286	1.335	-0.049
1945-11-16 17:11:04	-274.266	1.296	1.347	-0.051
1945-11-16 17:11:51	-274.252	1.307	1.353	-0.047
1945-11-16 17:12:39	-274.239	1.317	1.359	-0.042
1945-11-16 17:15:05	-274.199	1.328	1.378	-0.05
1945-11-16 17:17:32	-274.158	1.339	1.397	-0.058
1945-11-16 17:18:19	-274.145	1.348	1.403	-0.055
1945-11-16 17:20:46	-274.104	1.359	1.422	-0.063
1945-11-16 17:22:23	-274.077	1.37	1.434	-0.065
1945-11-16 17:24:50	-274.036	1.38	1.453	-0.073
1945-11-16 17:26:27	-274.009	1.39	1.466	-0.076
1945-11-16 17:28:04	-273.982	1.4	1.478	-0.078
1945-11-16 17:28:51	-273.969	1.411	1.485	-0.074
1945-11-16 17:29:38	-273.956	1.422	1.491	-0.069
1945-11-16 17:30:24	-273.943	1.437	1.497	-0.06
1945-11-16 17:31:10	-273.931	1.452	1.503	-0.051
1945-11-16 17:31:57	-273.918	1.461	1.509	-0.048
1945-11-16 17:32:46	-273.904	1.466	1.515	-0.049
1945-11-16 17:34:23	-273.877	1.477	1.528	-0.051
1945-11-16 17:35:10	-273.864	1.488	1.534	-0.046
1945-11-16 17:35:57	-273.851	1.498	1.54	-0.042
1945-11-16 17:36:44	-273.838	1.507	1.546	-0.039
1945-11-16 17:38:22	-273.811	1.513	1.559	-0.046
1945-11-16 17:39:11	-273.797	1.519	1.565	-0.047
1945-11-16 17:41:38	-273.756	1.529	1.584	-0.055
1945-11-16 17:43:15	-273.729	1.539	1.597	-0.058
1945-11-16 17:44:02	-273.716	1.551	1.603	-0.053
1945-11-16 17:45:39	-273.689	1.56	1.616	-0.056
1945-11-16 17:46:26	-273.676	1.571	1.622	-0.051
1945-11-16 17:48:03	-273.649	1.581	1.634	-0.053
1945-11-16 17:48:50	-273.636	1.592	1.641	-0.048
1945-11-16 17:50:27	-273.609	1.603	1.653	-0.05
1945-11-16 17:52:04	-273.582	1.613	1.666	-0.052
1945-11-16 17:53:41	-273.555	1.623	1.678	-0.055
1945-11-16 17:54:28	-273.542	1.633	1.684	-0.052
1945-11-16 17:56:05	-273.515	1.644	1.697	-0.053
1945-11-16 17:56:52	-273.502	1.655	1.703	-0.048
1945-11-16 17:57:39	-273.489	1.666	1.709	-0.043
1945-11-16 17:58:26	-273.476	1.676	1.715	-0.039
1945-11-16 17:59:13	-273.463	1.687	1.721	-0.034
1945-11-16 18:01:40	-273.422	1.698	1.74	-0.043
1945-11-16 18:03:17	-273.395	1.707	1.753	-0.045
1945-11-16 18:04:54	-273.368	1.718	1.765	-0.047
1945-11-16 18:06:31	-273.341	1.728	1.777	-0.049
1945-11-16 18:08:08	-273.314	1.739	1.79	-0.051
1945-11-16 18:09:45	-273.288	1.75	1.802	-0.052
1945-11-16 18:10:32	-273.274	1.76	1.808	-0.048
1945-11-16 18:11:19	-273.261	1.77	1.814	-0.044
1945-11-16 18:12:06	-273.248	1.781	1.82	-0.039
1945-11-16 18:13:43	-273.221	1.791	1.832	-0.041
1945-11-16 18:14:30	-273.208	1.802	1.838	-0.036
1945-11-16 18:16:07	-273.181	1.813	1.85	-0.038
1945-11-16 18:16:54	-273.168	1.823	1.856	-0.033
1945-11-16 18:17:41	-273.155	1.834	1.862	-0.028
1945-11-16 18:18:28	-273.142	1.845	1.868	-0.023
1945-11-16 18:20:05	-273.115	1.855	1.88	-0.025
1945-11-16 18:20:52	-273.102	1.866	1.886	-0.02
1945-11-16 18:21:39	-273.089	1.876	1.892	-0.015
1945-11-16 18:23:16	-273.062	1.886	1.904	-0.017
1945-11-16 18:24:53	-273.035	1.897	1.915	-0.019
1945-11-16 18:26:30	-273.008	1.907	1.927	-0.02
1945-11-16 18:28:07	-272.981	1.918	1.939	-0.021
1945-11-16 18:29:44	-272.954	1.929	1.951	-0.022
1945-11-16 18:30:31	-272.941	1.938	1.957	-0.018
1945-11-16 18:32:08	-272.914	1.949	1.968	-0.019
1945-11-16 18:33:45	-272.887	1.96	1.98	-0.02
1945-11-16 18:36:12	-272.847	1.97	1.997	-0.027
1945-11-16 18:37:49	-272.82	1.981	2.009	-0.028
1945-11-16 18:39:26	-272.793	1.991	2.02	-0.029
1945-11-16 18:40:13	-272.78	2.001	2.026	-0.025
1945-11-16 18:41:00	-272.767	2.012	2.031	-0.019
1945-11-16 18:41:47	-272.754	2.022	2.036	-0.014
1945-11-16 18:43:24	-272.727	2.033	2.048	-0.015
1945-11-16 18:44:11	-272.714	2.044	2.053	-0.009
1945-11-16 18:44:58	-272.701	2.054	2.058	-0.004
1945-11-16 18:45:45	-272.688	2.065	2.064	0.001
1945-11-16 18:47:22	-272.661	2.076	2.075	0.001
1945-11-16 18:48:59	-272.634	2.086	2.086	0
1945-11-16 18:50:36	-272.607	2.096	2.097	-0.001
1945-11-16 18:51:23	-272.594	2.106	2.102	0.005
1945-11-16 18:53:00	-272.567	2.117	2.113	0.005
1945-11-16 18:54:37	-272.54	2.128	2.123	0.005
1945-11-16 18:56:14	-272.513	2.138	2.134	0.005
1945-11-16 18:57:51	-272.486	2.148	2.144	0.004
1945-11-16 19:00:18	-272.445	2.159	2.16	-0.001
1945-11-16 19:01:55	-272.418	2.169	2.17	-0.001
1945-11-16 19:03:32	-272.391	2.18	2.18	0
1945-11-16 19:05:09	-272.364	2.191	2.19	0
1945-11-16 19:05:56	-272.351	2.2	2.195	0.005
1945-11-16 19:07:33	-272.324	2.211	2.205	0.006
1945-11-16 19:09:10	-272.297	2.222	2.215	0.007
1945-11-16 19:09:57	-272.284	2.232	2.219	0.013
1945-11-16 19:11:34	-272.257	2.243	2.229	0.014
1945-11-16 19:14:01	-272.216	2.253	2.243	0.01
1945-11-16 19:15:38	-272.189	2.263	2.253	0.01
1945-11-16 19:17:15	-272.163	2.274	2.262	0.012
1945-11-16 19:18:52	-272.136	2.284	2.271	0.013
1945-11-16 19:20:29	-272.109	2.295	2.28	0.015
1945-11-16 19:22:06	-272.082	2.305	2.289	0.016
1945-11-16 19:24:33	-272.041	2.315	2.302	0.013
1945-11-16 19:27:00	-272	2.326	2.315	0.011
1945-11-16 19:28:37	-271.973	2.335	2.323	0.012
1945-11-16 19:31:04	-271.932	2.346	2.336	0.01
1945-11-16 19:32:41	-271.905	2.357	2.344	0.013
1945-11-16 19:35:08	-271.864	2.367	2.356	0.011
1945-11-16 19:37:35	-271.824	2.377	2.368	0.009
1945-11-16 19:40:02	-271.783	2.387	2.379	0.008
1945-11-16 19:42:29	-271.742	2.397	2.39	0.007
1945-11-16 19:44:06	-271.715	2.408	2.397	0.011
1945-11-16 19:45:43	-271.688	2.419	2.404	0.015
1945-11-16 19:48:10	-271.647	2.428	2.414	0.014
1945-11-16 19:51:27	-271.592	2.438	2.427	0.01
1945-11-16 19:54:44	-271.538	2.448	2.44	0.009
1945-11-16 19:57:11	-271.497	2.458	2.449	0.009
1945-11-16 19:59:38	-271.456	2.468	2.457	0.01
1945-11-16 20:02:55	-271.401	2.477	2.468	0.009
1945-11-16 20:07:02	-271.333	2.487	2.481	0.006
1945-11-16 20:11:59	-271.25	2.496	2.494	0.002
1945-11-16 20:15:16	-271.196	2.505	2.502	0.002
1945-11-16 20:21:03	-271.099	2.513	2.515	-0.001
1945-11-16 20:26:00	-271.017	2.523	2.524	-0.001
1945-11-16 20:30:07	-270.948	2.531	2.529	0.002
1945-11-16 20:32:36	-270.907	2.536	2.532	0.003
1945-11-16 20:34:14	-270.879	2.541	2.534	0.007
1945-11-16 20:35:53	-270.852	2.545	2.535	0.01
1945-11-16 20:39:12	-270.797	2.547	2.538	0.01
1945-11-16 20:43:21	-270.728	2.548	2.539	0.009
1945-11-16 20:47:30	-270.658	2.55	2.539	0.01
1945-11-16 20:52:30	-270.575	2.55	2.538	0.012
1945-11-16 20:55:00	-270.533	2.547	2.536	0.011
1945-11-16 20:58:20	-270.478	2.545	2.533	0.012
1945-11-16 21:01:41	-270.422	2.541	2.529	0.011
1945-11-16 21:04:12	-270.38	2.538	2.526	0.012
1945-11-16 21:06:43	-270.338	2.534	2.522	0.011
1945-11-16 21:07:34	-270.324	2.529	2.521	0.008
1945-11-16 21:10:04	-270.282	2.525	2.516	0.009
1945-11-16 21:10:56	-270.268	2.52	2.515	0.005
1945-11-16 21:12:36	-270.24	2.518	2.512	0.006
1945-11-16 21:14:16	-270.212	2.516	2.508	0.008
1945-11-16 21:16:47	-270.17	2.514	2.502	0.012
1945-11-16 21:18:27	-270.142	2.512	2.498	0.014
1945-11-16 21:20:08	-270.114	2.509	2.494	0.015
1945-11-16 21:20:59	-270.1	2.505	2.492	0.013
1945-11-16 21:22:40	-270.072	2.499	2.488	0.012
1945-11-16 21:23:31	-270.058	2.495	2.485	0.01
1945-11-16 21:24:22	-270.044	2.491	2.483	0.008
1945-11-16 21:25:13	-270.03	2.489	2.481	0.008
1945-11-16 21:28:35	-269.974	2.479	2.47	0.009
1945-11-16 21:29:27	-269.959	2.471	2.468	0.003
1945-11-16 21:31:08	-269.931	2.465	2.462	0.003
1945-11-16 21:32:49	-269.903	2.462	2.457	0.005
1945-11-16 21:34:30	-269.875	2.459	2.451	0.008
1945-11-16 21:36:10	-269.847	2.456	2.445	0.01
1945-11-16 21:37:51	-269.819	2.453	2.439	0.013
1945-11-16 21:39:31	-269.791	2.45	2.433	0.017
1945-11-16 21:40:23	-269.777	2.445	2.43	0.015
1945-11-16 21:42:04	-269.749	2.44	2.424	0.016
1945-11-16 21:43:46	-269.721	2.43	2.417	0.013
1945-11-16 21:45:29	-269.692	2.42	2.41	0.01
1945-11-16 21:46:21	-269.678	2.412	2.406	0.006
1945-11-16 21:47:12	-269.663	2.407	2.403	0.004
1945-11-16 21:48:04	-269.649	2.403	2.399	0.003
1945-11-16 21:50:36	-269.607	2.392	2.388	0.003
1945-11-16 21:52:19	-269.578	2.382	2.381	0.001
1945-11-16 21:54:01	-269.55	2.372	2.373	-0.002
1945-11-16 21:55:44	-269.521	2.361	2.366	-0.005
1945-11-16 21:56:36	-269.507	2.355	2.362	-0.007
1945-11-16 21:57:27	-269.493	2.35	2.358	-0.007
1945-11-16 21:59:59	-269.45	2.341	2.346	-0.005
1945-11-16 22:01:42	-269.422	2.33	2.337	-0.007
1945-11-16 22:03:24	-269.393	2.319	2.329	-0.01
1945-11-16 22:05:07	-269.365	2.31	2.321	-0.011
1945-11-16 22:07:39	-269.322	2.299	2.308	-0.008
1945-11-16 22:11:02	-269.266	2.29	2.29	0
1945-11-16 22:12:44	-269.238	2.279	2.281	-0.002
1945-11-16 22:13:37	-269.223	2.268	2.276	-0.008
1945-11-16 22:16:10	-269.181	2.258	2.262	-0.005
1945-11-16 22:17:03	-269.166	2.247	2.258	-0.011
1945-11-16 22:18:45	-269.137	2.237	2.248	-0.011
1945-11-16 22:21:18	-269.095	2.227	2.234	-0.007
1945-11-16 22:23:00	-269.067	2.216	2.224	-0.008
1945-11-16 22:24:43	-269.038	2.206	2.214	-0.009
1945-11-16 22:26:25	-269.01	2.196	2.204	-0.008
1945-11-16 22:28:08	-268.981	2.185	2.194	-0.009
1945-11-16 22:29:51	-268.952	2.175	2.184	-0.009
1945-11-16 22:31:34	-268.924	2.164	2.174	-0.01
1945-11-16 22:32:26	-268.909	2.153	2.169	-0.015
1945-11-16 22:34:09	-268.881	2.143	2.158	-0.015
1945-11-16 22:36:41	-268.839	2.133	2.143	-0.01
1945-11-16 22:38:24	-268.81	2.122	2.132	-0.01
1945-11-16 22:40:07	-268.781	2.112	2.121	-0.009
1945-11-16 22:41:00	-268.767	2.101	2.116	-0.015
1945-11-16 22:41:52	-268.752	2.091	2.11	-0.02
1945-11-16 22:43:35	-268.724	2.08	2.099	-0.02
1945-11-16 22:44:28	-268.709	2.07	2.094	-0.024
1945-11-16 22:46:10	-268.681	2.06	2.083	-0.023
1945-11-16 22:47:02	-268.666	2.053	2.077	-0.024
1945-11-16 22:47:53	-268.652	2.049	2.072	-0.023
1945-11-16 22:49:36	-268.623	2.038	2.061	-0.022
1945-11-16 22:52:08	-268.581	2.029	2.044	-0.015
1945-11-16 22:53:51	-268.553	2.018	2.033	-0.015
1945-11-16 22:56:23	-268.51	2.007	2.016	-0.009
1945-11-16 22:58:56	-268.468	1.997	1.999	-0.002
1945-11-16 23:00:38	-268.439	1.987	1.988	0
1945-11-16 23:02:21	-268.411	1.977	1.976	0
1945-11-16 23:04:54	-268.368	1.966	1.959	0.007
1945-11-16 23:07:26	-268.326	1.956	1.942	0.015
1945-11-16 23:08:19	-268.311	1.946	1.936	0.01
1945-11-16 23:10:01	-268.283	1.935	1.924	0.011
1945-11-16 23:11:44	-268.254	1.924	1.912	0.012
1945-11-16 23:13:27	-268.226	1.914	1.9	0.013
1945-11-16 23:14:20	-268.211	1.903	1.894	0.009
1945-11-16 23:15:12	-268.197	1.893	1.888	0.005
1945-11-16 23:16:05	-268.182	1.883	1.882	0.001
1945-11-16 23:17:48	-268.153	1.872	1.87	0.002
1945-11-16 23:20:20	-268.111	1.862	1.853	0.009
1945-11-16 23:22:03	-268.082	1.851	1.841	0.01
1945-11-16 23:23:45	-268.054	1.841	1.829	0.013
1945-11-16 23:25:28	-268.026	1.831	1.817	0.014
1945-11-16 23:27:11	-267.997	1.82	1.805	0.015
1945-11-16 23:28:04	-267.982	1.809	1.798	0.011
1945-11-16 23:29:46	-267.954	1.799	1.786	0.012
1945-11-16 23:31:29	-267.925	1.788	1.774	0.014
1945-11-16 23:33:11	-267.897	1.778	1.762	0.016
1945-11-16 23:34:54	-267.868	1.768	1.75	0.017
1945-11-16 23:35:47	-267.854	1.757	1.744	0.013
1945-11-16 23:38:19	-267.811	1.747	1.726	0.02
1945-11-16 23:40:02	-267.783	1.736	1.714	0.022
1945-11-16 23:41:45	-267.754	1.726	1.702	0.024
1945-11-16 23:42:37	-267.74	1.716	1.696	0.019
1945-11-16 23:44:20	-267.711	1.705	1.684	0.021
1945-11-16 23:46:53	-267.669	1.694	1.666	0.028
1945-11-16 23:48:35	-267.64	1.684	1.654	0.029
1945-11-16 23:50:18	-267.612	1.674	1.642	0.032
1945-11-16 23:51:11	-267.597	1.663	1.636	0.027
1945-11-16 23:52:53	-267.569	1.653	1.624	0.028
1945-11-16 23:55:26	-267.526	1.642	1.607	0.036
1945-11-16 23:56:19	-267.511	1.632	1.601	0.031
1945-11-16 23:58:01	-267.483	1.622	1.589	0.033
1945-11-16 23:58:54	-267.468	1.612	1.583	0.03
1945-11-16 23:59:45	-267.454	1.606	1.577	0.029
1945-11-17 00:01:26	-267.426	1.603	1.565	0.038
1945-11-17 00:02:18	-267.412	1.596	1.559	0.037
1945-11-17 00:03:59	-267.384	1.591	1.548	0.043
1945-11-17 00:05:41	-267.355	1.584	1.536	0.048
1945-11-17 00:07:25	-267.326	1.569	1.524	0.044
1945-11-17 00:08:16	-267.312	1.562	1.518	0.044
1945-11-17 00:09:08	-267.298	1.556	1.513	0.043
1945-11-17 00:09:59	-267.284	1.552	1.507	0.045
1945-11-17 00:10:51	-267.269	1.545	1.501	0.044
1945-11-17 00:11:42	-267.255	1.541	1.495	0.046
1945-11-17 00:12:34	-267.241	1.531	1.489	0.042
1945-11-17 00:13:27	-267.226	1.521	1.484	0.037
1945-11-17 00:14:19	-267.211	1.511	1.478	0.033
1945-11-17 00:16:02	-267.183	1.499	1.466	0.033
1945-11-17 00:17:45	-267.154	1.489	1.455	0.034
1945-11-17 00:20:18	-267.112	1.478	1.438	0.04
1945-11-17 00:21:11	-267.097	1.467	1.432	0.035
1945-11-17 00:22:53	-267.069	1.458	1.421	0.037
1945-11-17 00:24:36	-267.04	1.447	1.41	0.037
1945-11-17 00:26:18	-267.012	1.437	1.399	0.037
1945-11-17 00:27:11	-266.997	1.426	1.394	0.032
1945-11-17 00:28:04	-266.982	1.415	1.388	0.027
1945-11-17 00:28:57	-266.967	1.405	1.382	0.022
1945-11-17 00:30:39	-266.939	1.394	1.371	0.023
1945-11-17 00:32:22	-266.911	1.383	1.361	0.023
1945-11-17 00:34:05	-266.882	1.374	1.35	0.024
1945-11-17 00:35:47	-266.854	1.363	1.339	0.024
1945-11-17 00:37:30	-266.825	1.352	1.329	0.024
1945-11-17 00:38:23	-266.81	1.342	1.323	0.018
1945-11-17 00:40:05	-266.782	1.331	1.313	0.018
1945-11-17 00:40:58	-266.767	1.322	1.308	0.014
1945-11-17 00:42:41	-266.739	1.311	1.298	0.013
1945-11-17 00:44:23	-266.71	1.3	1.287	0.013
1945-11-17 00:46:56	-266.668	1.29	1.272	0.017
1945-11-17 00:48:39	-266.639	1.279	1.263	0.016
1945-11-17 00:50:21	-266.611	1.268	1.253	0.016
1945-11-17 00:51:14	-266.596	1.259	1.248	0.011
1945-11-17 00:53:46	-266.554	1.248	1.234	0.015
1945-11-17 00:55:29	-266.525	1.237	1.224	0.013
1945-11-17 00:58:02	-266.483	1.228	1.21	0.018
1945-11-17 00:59:44	-266.454	1.217	1.201	0.016
1945-11-17 01:00:37	-266.44	1.207	1.196	0.01
1945-11-17 01:02:20	-266.411	1.196	1.187	0.009
1945-11-17 01:04:02	-266.383	1.185	1.178	0.007
1945-11-17 01:06:35	-266.34	1.176	1.165	0.01
1945-11-17 01:08:17	-266.312	1.165	1.157	0.008
1945-11-17 01:10:00	-266.283	1.154	1.148	0.006
1945-11-17 01:12:33	-266.241	1.144	1.136	0.008
1945-11-17 01:14:15	-266.212	1.134	1.128	0.006
1945-11-17 01:16:48	-266.17	1.124	1.116	0.007
1945-11-17 01:19:20	-266.128	1.113	1.105	0.008
1945-11-17 01:21:03	-266.099	1.103	1.097	0.006
1945-11-17 01:22:46	-266.071	1.093	1.09	0.003
1945-11-17 01:25:18	-266.028	1.082	1.079	0.003
1945-11-17 01:26:11	-266.014	1.072	1.075	-0.003
1945-11-17 01:29:33	-265.957	1.062	1.062	0
1945-11-17 01:31:16	-265.929	1.052	1.055	-0.003
1945-11-17 01:34:38	-265.873	1.042	1.043	-0.001
1945-11-17 01:38:50	-265.803	1.032	1.028	0.004
1945-11-17 01:43:02	-265.733	1.023	1.014	0.009
1945-11-17 01:46:24	-265.677	1.014	1.004	0.01
1945-11-17 01:49:47	-265.62	1.003	0.994	0.009
1945-11-17 01:53:09	-265.564	0.994	0.986	0.008
1945-11-17 01:54:52	-265.536	0.983	0.981	0.002
1945-11-17 01:58:14	-265.479	0.973	0.974	0
1945-11-17 02:03:16	-265.396	0.965	0.964	0.001
1945-11-17 02:08:17	-265.312	0.957	0.956	0.002
1945-11-17 02:13:19	-265.228	0.948	0.949	-0.002
1945-11-17 02:15:00	-265.2	0.944	0.948	-0.004
1945-11-17 02:19:11	-265.13	0.94	0.944	-0.004
1945-11-17 02:24:10	-265.047	0.94	0.942	-0.002
1945-11-17 02:27:30	-264.992	0.938	0.942	-0.004
1945-11-17 02:31:40	-264.922	0.936	0.943	-0.007
1945-11-17 02:34:59	-264.867	0.938	0.945	-0.007
1945-11-17 02:39:09	-264.798	0.939	0.949	-0.009
1945-11-17 02:42:28	-264.742	0.941	0.953	-0.011
1945-11-17 02:45:47	-264.687	0.944	0.957	-0.014
1945-11-17 02:48:15	-264.646	0.949	0.961	-0.012
1945-11-17 02:54:03	-264.549	0.955	0.973	-0.017
1945-11-17 02:59:50	-264.453	0.963	0.986	-0.024
1945-11-17 03:02:18	-264.412	0.968	0.993	-0.025
1945-11-17 03:05:37	-264.356	0.973	1.002	-0.029
1945-11-17 03:07:15	-264.329	0.979	1.007	-0.029
1945-11-17 03:08:04	-264.316	0.983	1.01	-0.027
1945-11-17 03:08:52	-264.302	0.989	1.012	-0.023
1945-11-17 03:10:31	-264.275	0.994	1.018	-0.024
1945-11-17 03:11:18	-264.262	1.004	1.02	-0.016
1945-11-17 03:12:05	-264.249	1.015	1.023	-0.008
1945-11-17 03:14:32	-264.208	1.024	1.032	-0.007
1945-11-17 03:16:59	-264.167	1.035	1.041	-0.005
1945-11-17 03:19:25	-264.126	1.046	1.05	-0.004
1945-11-17 03:22:42	-264.072	1.055	1.063	-0.007
1945-11-17 03:25:09	-264.031	1.066	1.073	-0.007
1945-11-17 03:27:36	-263.99	1.076	1.083	-0.008
1945-11-17 03:30:03	-263.949	1.086	1.094	-0.008
1945-11-17 03:32:30	-263.908	1.096	1.105	-0.01
1945-11-17 03:34:07	-263.881	1.106	1.113	-0.006
1945-11-17 03:35:44	-263.854	1.116	1.121	-0.005
1945-11-17 03:38:11	-263.814	1.127	1.132	-0.006
1945-11-17 03:39:48	-263.787	1.137	1.141	-0.003
1945-11-17 03:41:25	-263.76	1.148	1.149	-0.001
1945-11-17 03:43:02	-263.733	1.158	1.157	0.001
1945-11-17 03:46:19	-263.678	1.168	1.174	-0.006
1945-11-17 03:47:56	-263.651	1.179	1.183	-0.004
1945-11-17 03:49:33	-263.624	1.188	1.192	-0.003
1945-11-17 03:51:10	-263.597	1.199	1.201	-0.002
1945-11-17 03:54:27	-263.543	1.21	1.219	-0.009
1945-11-17 03:56:54	-263.502	1.219	1.233	-0.014
1945-11-17 03:59:21	-263.461	1.23	1.248	-0.018
1945-11-17 04:00:58	-263.434	1.241	1.257	-0.017
1945-11-17 04:01:45	-263.421	1.251	1.262	-0.011
1945-11-17 04:02:32	-263.408	1.262	1.267	-0.005
1945-11-17 04:03:19	-263.395	1.272	1.272	0
1945-11-17 04:04:06	-263.382	1.282	1.276	0.006
1945-11-17 04:04:53	-263.369	1.293	1.281	0.012
1945-11-17 04:07:20	-263.328	1.303	1.296	0.007
1945-11-17 04:08:57	-263.301	1.314	1.307	0.008
1945-11-17 04:10:34	-263.274	1.325	1.317	0.008
1945-11-17 04:12:11	-263.247	1.334	1.327	0.007
1945-11-17 04:13:48	-263.22	1.345	1.338	0.007
1945-11-17 04:15:25	-263.193	1.356	1.348	0.007
1945-11-17 04:16:12	-263.18	1.366	1.353	0.013
1945-11-17 04:17:49	-263.153	1.377	1.364	0.013
1945-11-17 04:19:26	-263.126	1.388	1.375	0.013
1945-11-17 04:21:03	-263.099	1.397	1.386	0.011
1945-11-17 04:21:51	-263.086	1.404	1.391	0.012
1945-11-17 04:22:39	-263.072	1.411	1.397	0.014
1945-11-17 04:23:28	-263.059	1.416	1.402	0.014
1945-11-17 04:24:16	-263.046	1.424	1.408	0.016
1945-11-17 04:25:03	-263.033	1.432	1.413	0.019
1945-11-17 04:25:50	-263.019	1.444	1.418	0.026
1945-11-17 04:26:37	-263.006	1.454	1.424	0.03
1945-11-17 04:27:26	-262.993	1.459	1.429	0.03
1945-11-17 04:29:53	-262.952	1.469	1.447	0.022
1945-11-17 04:33:10	-262.897	1.479	1.47	0.009
1945-11-17 04:34:47	-262.87	1.49	1.481	0.009
1945-11-17 04:36:24	-262.843	1.499	1.493	0.007
1945-11-17 04:38:01	-262.816	1.51	1.505	0.006
1945-11-17 04:39:38	-262.789	1.521	1.516	0.004
1945-11-17 04:41:15	-262.762	1.531	1.528	0.003
1945-11-17 04:42:02	-262.749	1.542	1.534	0.008
1945-11-17 04:43:38	-262.723	1.553	1.546	0.007
1945-11-17 04:45:16	-262.696	1.562	1.558	0.005
1945-11-17 04:46:53	-262.669	1.573	1.57	0.003
1945-11-17 04:47:40	-262.656	1.584	1.575	0.008
1945-11-17 04:48:27	-262.642	1.594	1.581	0.013
1945-11-17 04:49:14	-262.629	1.605	1.587	0.018
1945-11-17 04:50:01	-262.616	1.616	1.593	0.023
1945-11-17 04:50:48	-262.603	1.626	1.599	0.027
1945-11-17 04:51:35	-262.59	1.637	1.605	0.032
1945-11-17 04:53:12	-262.563	1.646	1.617	0.029
1945-11-17 04:54:49	-262.536	1.657	1.629	0.028
1945-11-17 04:56:26	-262.509	1.668	1.642	0.026
1945-11-17 04:58:53	-262.469	1.678	1.66	0.018
1945-11-17 05:00:30	-262.442	1.689	1.673	0.016
1945-11-17 05:02:07	-262.415	1.699	1.685	0.014
1945-11-17 05:03:44	-262.388	1.709	1.697	0.012
1945-11-17 05:05:21	-262.361	1.72	1.71	0.01
1945-11-17 05:06:58	-262.334	1.731	1.722	0.008
1945-11-17 05:08:35	-262.307	1.741	1.735	0.006
1945-11-17 05:09:22	-262.294	1.751	1.741	0.01
1945-11-17 05:10:59	-262.267	1.761	1.754	0.008
1945-11-17 05:12:36	-262.24	1.772	1.766	0.006
1945-11-17 05:13:23	-262.227	1.783	1.772	0.01
1945-11-17 05:15:00	-262.2	1.793	1.785	0.008
1945-11-17 05:15:47	-262.187	1.804	1.791	0.013
1945-11-17 05:16:34	-262.174	1.815	1.797	0.017
1945-11-17 05:17:21	-262.161	1.825	1.804	0.022
1945-11-17 05:18:08	-262.148	1.836	1.81	0.026
1945-11-17 05:18:55	-262.135	1.847	1.816	0.031
1945-11-17 05:19:42	-262.122	1.857	1.822	0.035
1945-11-17 05:20:29	-262.109	1.867	1.828	0.039
1945-11-17 05:22:06	-262.082	1.877	1.841	0.037
1945-11-17 05:23:43	-262.055	1.888	1.854	0.034
1945-11-17 05:26:10	-262.014	1.899	1.873	0.026
1945-11-17 05:27:47	-261.987	1.909	1.886	0.024
1945-11-17 05:29:24	-261.96	1.919	1.899	0.02
1945-11-17 05:31:51	-261.919	1.93	1.918	0.012
1945-11-17 05:33:28	-261.892	1.94	1.931	0.01
1945-11-17 05:35:05	-261.865	1.95	1.943	0.006
1945-11-17 05:36:42	-261.838	1.961	1.956	0.004
1945-11-17 05:37:29	-261.825	1.971	1.962	0.009
1945-11-17 05:39:06	-261.798	1.982	1.975	0.007
1945-11-17 05:40:43	-261.771	1.993	1.988	0.005
1945-11-17 05:42:20	-261.744	2.003	2.001	0.003
1945-11-17 05:43:57	-261.717	2.014	2.013	0
1945-11-17 05:44:44	-261.704	2.023	2.019	0.004
1945-11-17 05:45:31	-261.691	2.034	2.026	0.008
1945-11-17 05:46:18	-261.678	2.045	2.032	0.013
1945-11-17 05:47:05	-261.665	2.055	2.038	0.017
1945-11-17 05:48:42	-261.638	2.066	2.051	0.015
1945-11-17 05:50:19	-261.611	2.077	2.063	0.013
1945-11-17 05:51:56	-261.584	2.087	2.076	0.011
1945-11-17 05:52:43	-261.571	2.098	2.082	0.016
1945-11-17 05:54:20	-261.544	2.109	2.095	0.014
1945-11-17 05:55:07	-261.531	2.118	2.101	0.017
1945-11-17 05:57:34	-261.491	2.129	2.12	0.009
1945-11-17 06:00:01	-261.45	2.139	2.139	0.001
1945-11-17 06:01:38	-261.423	2.15	2.151	-0.001
1945-11-17 06:03:15	-261.396	2.16	2.164	-0.004
1945-11-17 06:05:42	-261.355	2.17	2.182	-0.012
1945-11-17 06:07:19	-261.328	2.181	2.195	-0.014
1945-11-17 06:09:46	-261.287	2.191	2.213	-0.023
1945-11-17 06:11:23	-261.26	2.201	2.225	-0.024
1945-11-17 06:13:00	-261.233	2.212	2.238	-0.026
1945-11-17 06:14:37	-261.206	2.223	2.25	-0.027
1945-11-17 06:16:14	-261.179	2.233	2.262	-0.028
1945-11-17 06:17:51	-261.152	2.243	2.274	-0.031
1945-11-17 06:19:28	-261.126	2.253	2.286	-0.032
1945-11-17 06:20:15	-261.113	2.264	2.291	-0.027
1945-11-17 06:21:02	-261.099	2.275	2.297	-0.022
1945-11-17 06:22:39	-261.072	2.285	2.309	-0.024
1945-11-17 06:23:26	-261.059	2.296	2.315	-0.019
1945-11-17 06:24:13	-261.046	2.307	2.32	-0.014
1945-11-17 06:25:50	-261.019	2.316	2.332	-0.016
1945-11-17 06:27:27	-260.993	2.327	2.344	-0.017
1945-11-17 06:29:04	-260.966	2.338	2.355	-0.018
1945-11-17 06:30:41	-260.939	2.348	2.367	-0.019
1945-11-17 06:32:18	-260.912	2.359	2.378	-0.019
1945-11-17 06:33:55	-260.885	2.37	2.39	-0.02
1945-11-17 06:35:32	-260.858	2.379	2.401	-0.022
1945-11-17 06:36:19	-260.845	2.39	2.406	-0.017
1945-11-17 06:37:56	-260.818	2.4	2.418	-0.017
1945-11-17 06:38:43	-260.805	2.411	2.423	-0.012
1945-11-17 06:40:20	-260.778	2.422	2.434	-0.012
1945-11-17 06:41:07	-260.765	2.432	2.439	-0.007
1945-11-17 06:42:44	-260.738	2.443	2.45	-0.007
1945-11-17 06:43:31	-260.725	2.453	2.455	-0.003
1945-11-17 06:45:08	-260.698	2.463	2.466	-0.003
1945-11-17 06:47:35	-260.657	2.474	2.482	-0.009
1945-11-17 06:49:12	-260.63	2.485	2.493	-0.009
1945-11-17 06:50:49	-260.603	2.494	2.504	-0.009
1945-11-17 06:53:16	-260.562	2.505	2.519	-0.014
1945-11-17 06:55:43	-260.521	2.515	2.535	-0.019
1945-11-17 06:57:20	-260.494	2.525	2.545	-0.02
1945-11-17 07:00:37	-260.44	2.536	2.565	-0.029
1945-11-17 07:02:13	-260.413	2.546	2.575	-0.028
1945-11-17 07:03:51	-260.386	2.556	2.584	-0.029
1945-11-17 07:05:28	-260.359	2.567	2.594	-0.027
1945-11-17 07:07:05	-260.332	2.577	2.603	-0.026
1945-11-17 07:08:41	-260.305	2.588	2.613	-0.025
1945-11-17 07:10:18	-260.278	2.598	2.622	-0.023
1945-11-17 07:11:05	-260.265	2.609	2.626	-0.017
1945-11-17 07:12:43	-260.238	2.619	2.635	-0.017
1945-11-17 07:14:20	-260.211	2.629	2.644	-0.015
1945-11-17 07:16:46	-260.171	2.64	2.657	-0.017
1945-11-17 07:18:23	-260.144	2.651	2.666	-0.015
1945-11-17 07:20:50	-260.103	2.66	2.679	-0.018
1945-11-17 07:23:17	-260.062	2.671	2.691	-0.02
1945-11-17 07:24:54	-260.035	2.682	2.699	-0.018
1945-11-17 07:26:31	-260.008	2.691	2.707	-0.016
1945-11-17 07:28:58	-259.967	2.702	2.719	-0.017
1945-11-17 07:32:15	-259.913	2.711	2.734	-0.023
1945-11-17 07:33:52	-259.886	2.722	2.741	-0.019
1945-11-17 07:35:29	-259.859	2.733	2.749	-0.016
1945-11-17 07:36:15	-259.846	2.749	2.752	-0.003
1945-11-17 07:38:44	-259.804	2.752	2.762	-0.011
1945-11-17 07:39:32	-259.791	2.758	2.766	-0.007
1945-11-17 07:40:20	-259.778	2.765	2.769	-0.004
1945-11-17 07:41:59	-259.75	2.769	2.776	-0.007
1945-11-17 07:44:26	-259.709	2.778	2.785	-0.007
1945-11-17 07:45:14	-259.696	2.784	2.788	-0.004
1945-11-17 07:46:53	-259.669	2.789	2.794	-0.005
1945-11-17 07:49:21	-259.627	2.793	2.803	-0.01
1945-11-17 07:50:10	-259.614	2.799	2.806	-0.007
1945-11-17 07:50:58	-259.601	2.805	2.809	-0.004
1945-11-17 07:53:27	-259.559	2.808	2.817	-0.009
1945-11-17 07:55:05	-259.532	2.813	2.822	-0.01
1945-11-17 07:56:44	-259.504	2.818	2.828	-0.01
1945-11-17 07:57:32	-259.491	2.823	2.83	-0.007
1945-11-17 07:59:11	-259.464	2.829	2.835	-0.006
1945-11-17 08:00:49	-259.436	2.834	2.839	-0.006
1945-11-17 08:03:17	-259.395	2.838	2.846	-0.008
1945-11-17 08:05:46	-259.354	2.842	2.852	-0.01
1945-11-17 08:07:25	-259.326	2.847	2.856	-0.01
1945-11-17 08:08:13	-259.313	2.853	2.858	-0.005
1945-11-17 08:09:52	-259.286	2.857	2.862	-0.004
1945-11-17 08:11:30	-259.258	2.862	2.865	-0.003
1945-11-17 08:13:59	-259.217	2.867	2.87	-0.003
1945-11-17 08:16:27	-259.176	2.871	2.874	-0.003
1945-11-17 08:19:46	-259.121	2.874	2.879	-0.005
1945-11-17 08:21:25	-259.093	2.879	2.881	-0.003
1945-11-17 08:23:53	-259.052	2.883	2.884	-0.001
1945-11-17 08:26:21	-259.011	2.888	2.886	0.002
1945-11-17 08:28:00	-258.983	2.892	2.888	0.005
1945-11-17 08:31:19	-258.928	2.896	2.89	0.006
1945-11-17 08:34:38	-258.873	2.898	2.891	0.007
1945-11-17 08:37:57	-258.817	2.9	2.891	0.009
1945-11-17 08:42:06	-258.748	2.902	2.889	0.013
1945-11-17 08:47:05	-258.665	2.903	2.886	0.017
1945-11-17 08:50:25	-258.61	2.903	2.882	0.021
1945-11-17 08:54:35	-258.54	2.901	2.876	0.025
1945-11-17 08:57:05	-258.499	2.898	2.872	0.026
1945-11-17 08:58:46	-258.471	2.893	2.868	0.025
1945-11-17 09:00:28	-258.442	2.888	2.865	0.023
1945-11-17 09:03:00	-258.4	2.879	2.859	0.019
1945-11-17 09:05:32	-258.358	2.869	2.853	0.016
1945-11-17 09:08:55	-258.301	2.858	2.844	0.015
1945-11-17 09:13:07	-258.231	2.849	2.831	0.018
1945-11-17 09:17:19	-258.161	2.84	2.817	0.023
1945-11-17 09:22:21	-258.077	2.832	2.798	0.033
1945-11-17 09:24:53	-258.035	2.821	2.788	0.033
1945-11-17 09:27:25	-257.993	2.811	2.778	0.034
1945-11-17 09:29:58	-257.951	2.801	2.766	0.034
1945-11-17 09:31:41	-257.922	2.79	2.759	0.031
1945-11-17 09:33:23	-257.894	2.781	2.751	0.03
1945-11-17 09:34:16	-257.879	2.77	2.747	0.023
1945-11-17 09:34:19	-257.878	2.759	2.746	0.013
1945-11-17 09:36:51	-257.836	2.749	2.734	0.014
1945-11-17 09:38:34	-257.807	2.738	2.726	0.012
1945-11-17 09:41:05	-257.765	2.733	2.713	0.02
1945-11-17 09:42:46	-257.737	2.729	2.704	0.026
1945-11-17 09:44:28	-257.709	2.723	2.695	0.028
1945-11-17 09:47:00	-257.667	2.713	2.681	0.033
1945-11-17 09:47:53	-257.652	2.703	2.676	0.027
1945-11-17 09:48:45	-257.637	2.692	2.671	0.021
1945-11-17 09:51:18	-257.595	2.682	2.656	0.025
1945-11-17 09:52:09	-257.581	2.676	2.651	0.025
1945-11-17 09:53:01	-257.566	2.669	2.646	0.023
1945-11-17 09:53:14	-257.563	2.621	2.645	-0.024
1945-11-17 09:58:16	-257.479	2.612	2.614	-0.002
1945-11-17 10:00:49	-257.436	2.602	2.598	0.004
1945-11-17 10:02:31	-257.408	2.591	2.587	0.004
1945-11-17 10:04:14	-257.379	2.581	2.576	0.006
1945-11-17 10:05:07	-257.365	2.571	2.57	0.001
1945-11-17 10:05:59	-257.35	2.56	2.564	-0.004
1945-11-17 10:07:42	-257.322	2.549	2.552	-0.003
1945-11-17 10:09:25	-257.293	2.539	2.541	-0.002
1945-11-17 10:11:08	-257.264	2.528	2.529	-0.001
1945-11-17 10:12:00	-257.25	2.518	2.523	-0.005
1945-11-17 10:14:33	-257.207	2.507	2.505	0.002
1945-11-17 10:15:25	-257.193	2.497	2.499	-0.001
1945-11-17 10:17:08	-257.164	2.487	2.486	0.001
1945-11-17 10:17:11	-257.164	2.476	2.486	-0.01
1945-11-17 10:18:54	-257.135	2.465	2.473	-0.008
1945-11-17 10:19:47	-257.12	2.455	2.467	-0.012
1945-11-17 10:21:29	-257.092	2.444	2.454	-0.01
1945-11-17 10:22:22	-257.077	2.433	2.447	-0.014
1945-11-17 10:24:05	-257.049	2.423	2.434	-0.012
1945-11-17 10:25:47	-257.02	2.413	2.421	-0.008
1945-11-17 10:26:40	-257.006	2.403	2.415	-0.012
1945-11-17 10:28:23	-256.977	2.392	2.401	-0.01
1945-11-17 10:30:05	-256.949	2.381	2.388	-0.007
1945-11-17 10:30:58	-256.934	2.371	2.381	-0.011
1945-11-17 10:32:41	-256.905	2.36	2.368	-0.008
1945-11-17 10:33:34	-256.891	2.349	2.36	-0.011
1945-11-17 10:35:16	-256.862	2.339	2.347	-0.008
1945-11-17 10:36:09	-256.848	2.329	2.34	-0.011
1945-11-17 10:37:52	-256.819	2.318	2.326	-0.007
1945-11-17 10:38:44	-256.804	2.308	2.319	-0.011
1945-11-17 10:40:27	-256.776	2.297	2.304	-0.007
1945-11-17 10:42:10	-256.747	2.286	2.29	-0.004
1945-11-17 10:43:52	-256.719	2.276	2.276	0
1945-11-17 10:44:45	-256.704	2.265	2.268	-0.003
1945-11-17 10:46:28	-256.676	2.254	2.254	0.001
1945-11-17 10:47:20	-256.661	2.245	2.247	-0.002
1945-11-17 10:48:13	-256.646	2.234	2.239	-0.005
1945-11-17 10:49:56	-256.618	2.224	2.224	-0.001
1945-11-17 10:52:29	-256.575	2.213	2.202	0.011
1945-11-17 10:53:21	-256.561	2.202	2.195	0.008
1945-11-17 10:55:04	-256.532	2.192	2.18	0.012
1945-11-17 10:56:46	-256.504	2.182	2.165	0.017
1945-11-17 10:57:39	-256.489	2.171	2.157	0.014
1945-11-17 10:58:32	-256.474	2.161	2.149	0.012
1945-11-17 10:59:25	-256.46	2.15	2.141	0.009
1945-11-17 11:01:08	-256.431	2.139	2.126	0.014
1945-11-17 11:02:00	-256.417	2.129	2.118	0.011
1945-11-17 11:02:53	-256.402	2.118	2.11	0.008
1945-11-17 11:04:36	-256.373	2.108	2.095	0.013
1945-11-17 11:05:29	-256.359	2.097	2.087	0.01
1945-11-17 11:07:11	-256.33	2.086	2.071	0.015
1945-11-17 11:08:04	-256.316	2.076	2.063	0.012
1945-11-17 11:09:47	-256.287	2.066	2.047	0.019
1945-11-17 11:10:39	-256.272	2.055	2.039	0.016
1945-11-17 11:11:32	-256.258	2.045	2.031	0.013
1945-11-17 11:12:25	-256.243	2.034	2.023	0.011
1945-11-17 11:13:18	-256.228	2.023	2.015	0.008
1945-11-17 11:15:00	-256.2	2.013	1.999	0.013
1945-11-17 11:17:33	-256.158	2.002	1.975	0.027
1945-11-17 11:18:26	-256.143	1.991	1.967	0.024
1945-11-17 11:19:18	-256.128	1.982	1.959	0.023
1945-11-17 11:20:11	-256.114	1.971	1.951	0.02
1945-11-17 11:21:05	-256.099	1.955	1.942	0.013
1945-11-17 11:22:02	-256.083	1.932	1.933	-0.002
1945-11-17 11:22:03	-256.082	1.926	1.933	-0.007
1945-11-17 11:23:44	-256.054	1.921	1.917	0.004
1945-11-17 11:25:27	-256.026	1.91	1.901	0.009
1945-11-17 11:26:20	-256.011	1.901	1.893	0.008
1945-11-17 11:28:52	-255.969	1.89	1.869	0.022
1945-11-17 11:30:35	-255.94	1.88	1.852	0.028
1945-11-17 11:31:28	-255.926	1.869	1.844	0.025
1945-11-17 11:32:20	-255.911	1.858	1.835	0.023
1945-11-17 11:33:13	-255.896	1.848	1.827	0.021
1945-11-17 11:34:06	-255.882	1.837	1.818	0.019
1945-11-17 11:35:49	-255.853	1.826	1.802	0.025
1945-11-17 11:36:42	-255.838	1.816	1.793	0.022
1945-11-17 11:37:34	-255.824	1.805	1.785	0.02
1945-11-17 11:39:17	-255.795	1.795	1.768	0.027
1945-11-17 11:40:10	-255.781	1.785	1.76	0.025
1945-11-17 11:41:02	-255.766	1.774	1.751	0.023
1945-11-17 11:41:55	-255.751	1.764	1.743	0.021
1945-11-17 11:42:48	-255.737	1.753	1.734	0.019
1945-11-17 11:43:41	-255.722	1.742	1.726	0.017
1945-11-17 11:45:23	-255.694	1.732	1.709	0.022
1945-11-17 11:46:16	-255.679	1.721	1.701	0.02
1945-11-17 11:47:09	-255.664	1.71	1.692	0.018
1945-11-17 11:48:52	-255.636	1.7	1.675	0.024
1945-11-17 11:49:44	-255.621	1.69	1.667	0.023
1945-11-17 11:50:35	-255.607	1.686	1.658	0.027
1945-11-17 12:13:05	-255.232	1.494	1.439	0.055
1945-11-17 12:14:48	-255.203	1.483	1.422	0.062
1945-11-17 12:16:30	-255.175	1.473	1.405	0.067
1945-11-17 12:18:13	-255.146	1.463	1.389	0.075
1945-11-17 12:19:05	-255.132	1.453	1.38	0.072
1945-11-17 12:19:58	-255.117	1.442	1.372	0.07
1945-11-17 12:20:01	-255.116	1.431	1.371	0.06
1945-11-17 12:20:54	-255.102	1.421	1.363	0.058
1945-11-17 12:21:47	-255.087	1.41	1.354	0.056
1945-11-17 12:22:40	-255.072	1.398	1.346	0.053
1945-11-17 12:23:32	-255.058	1.39	1.337	0.053
1945-11-17 12:25:17	-255.029	1.369	1.32	0.049
1945-11-17 12:26:12	-255.013	1.35	1.311	0.039
1945-11-17 12:27:54	-254.985	1.343	1.295	0.048
1945-11-17 12:28:47	-254.97	1.332	1.287	0.046
1945-11-17 12:30:30	-254.942	1.322	1.27	0.051
1945-11-17 12:31:23	-254.927	1.311	1.262	0.049
1945-11-17 12:33:05	-254.899	1.3	1.246	0.055
1945-11-17 12:33:58	-254.884	1.291	1.237	0.054
1945-11-17 12:34:51	-254.869	1.28	1.229	0.051
1945-11-17 12:35:42	-254.855	1.275	1.221	0.054
1945-11-17 12:36:33	-254.841	1.269	1.213	0.057
1945-11-17 12:37:26	-254.826	1.259	1.204	0.055
1945-11-17 12:38:19	-254.811	1.248	1.196	0.052
1945-11-17 12:39:12	-254.797	1.237	1.188	0.05
1945-11-17 12:40:04	-254.782	1.227	1.179	0.047
1945-11-17 12:40:57	-254.768	1.216	1.171	0.045
1945-11-17 12:41:50	-254.753	1.205	1.163	0.043
1945-11-17 12:42:43	-254.738	1.195	1.154	0.04
1945-11-17 12:44:26	-254.709	1.184	1.138	0.046
1945-11-17 12:45:18	-254.695	1.174	1.13	0.043
1945-11-17 12:46:11	-254.68	1.164	1.122	0.042
1945-11-17 12:47:04	-254.666	1.153	1.114	0.039
1945-11-17 12:47:56	-254.651	1.143	1.106	0.037
1945-11-17 12:49:39	-254.623	1.132	1.09	0.042
1945-11-17 12:51:22	-254.594	1.121	1.074	0.047
1945-11-17 12:52:15	-254.579	1.111	1.066	0.044
1945-11-17 12:53:07	-254.565	1.1	1.058	0.042
1945-11-17 12:54:50	-254.536	1.089	1.043	0.047
1945-11-17 12:56:33	-254.507	1.079	1.027	0.052
1945-11-17 12:58:16	-254.479	1.068	1.012	0.056
1945-11-17 12:59:08	-254.464	1.059	1.004	0.055
1945-11-17 13:00:01	-254.45	1.048	0.996	0.052
1945-11-17 13:00:54	-254.435	1.037	0.988	0.049
1945-11-17 13:01:46	-254.421	1.027	0.98	0.046
1945-11-17 13:03:29	-254.392	1.016	0.965	0.051
1945-11-17 13:05:12	-254.363	1.005	0.95	0.055
1945-11-17 13:06:04	-254.349	0.997	0.942	0.054
1945-11-17 13:06:56	-254.334	0.988	0.935	0.053
1945-11-17 13:07:48	-254.32	0.98	0.927	0.053
1945-11-17 13:08:41	-254.305	0.969	0.92	0.05
1945-11-17 13:09:34	-254.291	0.958	0.912	0.047
1945-11-17 13:10:27	-254.276	0.948	0.904	0.044
1945-11-17 13:11:20	-254.261	0.937	0.897	0.04
1945-11-17 13:12:12	-254.247	0.926	0.889	0.037
1945-11-17 13:13:05	-254.232	0.916	0.882	0.034
1945-11-17 13:13:58	-254.217	0.905	0.874	0.031
1945-11-17 13:14:51	-254.202	0.895	0.867	0.028
1945-11-17 13:16:33	-254.174	0.885	0.852	0.033
1945-11-17 13:18:16	-254.146	0.874	0.838	0.036
1945-11-17 13:19:09	-254.131	0.864	0.83	0.033
1945-11-17 13:20:02	-254.116	0.853	0.823	0.03
1945-11-17 13:20:54	-254.102	0.842	0.816	0.026
1945-11-17 13:21:47	-254.087	0.832	0.809	0.023
1945-11-17 13:23:30	-254.058	0.821	0.795	0.026
1945-11-17 13:26:02	-254.016	0.811	0.774	0.037
1945-11-17 13:26:54	-254.002	0.805	0.767	0.038
1945-11-17 13:28:35	-253.974	0.801	0.754	0.047
1945-11-17 13:29:28	-253.959	0.79	0.747	0.043
1945-11-17 13:30:20	-253.944	0.779	0.74	0.04
1945-11-17 13:31:13	-253.93	0.769	0.733	0.036
1945-11-17 13:32:06	-253.915	0.758	0.726	0.032
1945-11-17 13:32:59	-253.9	0.748	0.719	0.028
1945-11-17 13:33:51	-253.886	0.738	0.712	0.026
1945-11-17 13:35:34	-253.857	0.727	0.699	0.028
1945-11-17 13:38:07	-253.815	0.717	0.68	0.037
1945-11-17 13:40:39	-253.773	0.706	0.661	0.045
1945-11-17 13:42:22	-253.744	0.696	0.648	0.048
1945-11-17 13:43:14	-253.729	0.686	0.642	0.044
1945-11-17 13:44:07	-253.715	0.675	0.635	0.04
1945-11-17 13:45:00	-253.7	0.664	0.629	0.035
1945-11-17 13:46:43	-253.671	0.654	0.617	0.037
1945-11-17 13:47:35	-253.657	0.643	0.611	0.033
1945-11-17 13:48:28	-253.642	0.633	0.604	0.028
1945-11-17 13:50:11	-253.614	0.622	0.592	0.029
1945-11-17 13:51:04	-253.599	0.611	0.586	0.025
1945-11-17 13:52:46	-253.571	0.602	0.575	0.027
1945-11-17 13:54:29	-253.542	0.591	0.563	0.028
1945-11-17 13:56:12	-253.513	0.58	0.552	0.029
1945-11-17 13:57:54	-253.485	0.57	0.54	0.029
1945-11-17 13:59:37	-253.456	0.559	0.529	0.03
1945-11-17 14:00:30	-253.442	0.548	0.524	0.025
1945-11-17 14:02:12	-253.413	0.538	0.513	0.025
1945-11-17 14:03:55	-253.385	0.528	0.502	0.026
1945-11-17 14:04:48	-253.37	0.518	0.497	0.021
1945-11-17 14:08:10	-253.314	0.507	0.476	0.03
1945-11-17 14:09:53	-253.285	0.497	0.466	0.031
1945-11-17 14:11:35	-253.257	0.487	0.456	0.03
1945-11-17 14:13:18	-253.228	0.476	0.447	0.029
1945-11-17 14:15:01	-253.2	0.465	0.437	0.028
1945-11-17 14:16:43	-253.171	0.455	0.428	0.027
1945-11-17 14:18:26	-253.143	0.445	0.419	0.026
1945-11-17 14:19:19	-253.128	0.434	0.414	0.02
1945-11-17 14:21:01	-253.1	0.424	0.405	0.019
1945-11-17 14:23:34	-253.057	0.413	0.392	0.021
1945-11-17 14:25:17	-253.029	0.402	0.384	0.019
1945-11-17 14:26:09	-253.014	0.393	0.38	0.013
1945-11-17 14:27:52	-252.986	0.382	0.372	0.011
1945-11-17 14:29:35	-252.957	0.372	0.364	0.008
1945-11-17 14:32:07	-252.915	0.361	0.353	0.008
1945-11-17 14:33:50	-252.886	0.351	0.345	0.006
1945-11-17 14:37:12	-252.83	0.341	0.331	0.009
1945-11-17 14:38:05	-252.815	0.33	0.328	0.002
1945-11-17 14:39:46	-252.787	0.325	0.321	0.003
1945-11-17 14:40:39	-252.773	0.313	0.318	-0.005
1945-11-17 14:44:02	-252.716	0.302	0.306	-0.003
1945-11-17 14:44:54	-252.702	0.293	0.303	-0.01
1945-11-17 14:46:37	-252.673	0.282	0.297	-0.015
1945-11-17 14:49:59	-252.617	0.273	0.287	-0.014
1945-11-17 14:53:22	-252.561	0.262	0.277	-0.015
1945-11-17 14:55:54	-252.518	0.252	0.27	-0.018
1945-11-17 15:00:06	-252.448	0.243	0.26	-0.018
1945-11-17 15:02:37	-252.406	0.237	0.255	-0.018
1945-11-17 15:05:07	-252.365	0.236	0.25	-0.014
1945-11-17 15:05:58	-252.351	0.232	0.249	-0.017
1945-11-17 15:07:39	-252.322	0.229	0.246	-0.017
1945-11-17 15:10:10	-252.281	0.226	0.243	-0.017
1945-11-17 15:12:40	-252.239	0.223	0.24	-0.017
1945-11-17 15:16:50	-252.169	0.221	0.236	-0.015
1945-11-17 15:19:20	-252.128	0.219	0.235	-0.015
1945-11-17 15:24:20	-252.044	0.219	0.234	-0.014
1945-11-17 15:28:29	-251.975	0.221	0.235	-0.013
1945-11-17 15:31:48	-251.92	0.225	0.237	-0.012
1945-11-17 15:35:07	-251.865	0.227	0.24	-0.013
1945-11-17 15:38:26	-251.809	0.229	0.244	-0.015
1945-11-17 15:40:54	-251.768	0.233	0.248	-0.015
1945-11-17 15:44:13	-251.713	0.237	0.254	-0.017
1945-11-17 15:46:41	-251.672	0.242	0.26	-0.018
1945-11-17 15:49:10	-251.631	0.246	0.266	-0.02
1945-11-17 15:51:38	-251.589	0.25	0.272	-0.022
1945-11-17 15:53:17	-251.562	0.254	0.277	-0.022
1945-11-17 15:54:55	-251.535	0.261	0.282	-0.021
1945-11-17 15:56:34	-251.507	0.265	0.287	-0.022
1945-11-17 15:58:13	-251.48	0.268	0.292	-0.024
1945-11-17 15:59:01	-251.466	0.275	0.295	-0.02
1945-11-17 16:00:40	-251.439	0.279	0.301	-0.022
1945-11-17 16:03:08	-251.398	0.283	0.31	-0.026
1945-11-17 16:04:47	-251.37	0.289	0.316	-0.027
1945-11-17 16:07:15	-251.329	0.293	0.326	-0.033
1945-11-17 16:08:03	-251.316	0.299	0.329	-0.03
1945-11-17 16:09:42	-251.288	0.303	0.336	-0.033
1945-11-17 16:10:30	-251.275	0.311	0.34	-0.029
1945-11-17 16:12:09	-251.248	0.315	0.347	-0.032
1945-11-17 16:13:47	-251.22	0.322	0.355	-0.033
1945-11-17 16:14:35	-251.207	0.328	0.358	-0.03
1945-11-17 16:15:23	-251.194	0.333	0.362	-0.029
1945-11-17 16:16:11	-251.18	0.34	0.366	-0.026
1945-11-17 16:17:00	-251.167	0.345	0.37	-0.025
1945-11-17 16:17:48	-251.153	0.35	0.374	-0.023
1945-11-17 16:18:37	-251.14	0.355	0.378	-0.023
1945-11-17 16:19:25	-251.126	0.361	0.382	-0.021
1945-11-17 16:21:04	-251.099	0.365	0.39	-0.025
1945-11-17 16:21:52	-251.086	0.373	0.395	-0.022
1945-11-17 16:23:30	-251.058	0.379	0.403	-0.024
1945-11-17 16:24:18	-251.045	0.387	0.408	-0.021
1945-11-17 16:25:55	-251.018	0.396	0.417	-0.02
1945-11-17 16:28:22	-250.977	0.407	0.43	-0.024
1945-11-17 16:29:56	-250.951	0.428	0.439	-0.011
1945-11-17 16:29:59	-250.95	0.417	0.44	-0.022
1945-11-17 16:30:43	-250.938	0.439	0.444	-0.005
1945-11-17 16:34:00	-250.883	0.448	0.464	-0.015
1945-11-17 16:35:37	-250.856	0.458	0.474	-0.016
1945-11-17 16:36:24	-250.843	0.47	0.479	-0.009
1945-11-17 16:38:51	-250.803	0.48	0.494	-0.014
1945-11-17 16:39:38	-250.789	0.491	0.499	-0.008
1945-11-17 16:42:05	-250.749	0.5	0.515	-0.015
1945-11-17 16:42:52	-250.736	0.511	0.521	-0.01
1945-11-17 16:45:19	-250.695	0.522	0.537	-0.016
1945-11-17 16:46:06	-250.682	0.532	0.543	-0.01
1945-11-17 16:47:43	-250.655	0.543	0.554	-0.011
1945-11-17 16:49:20	-250.628	0.553	0.565	-0.013
1945-11-17 16:51:47	-250.587	0.563	0.583	-0.02
1945-11-17 16:52:34	-250.574	0.574	0.589	-0.015
1945-11-17 16:55:01	-250.533	0.585	0.607	-0.022
1945-11-17 16:55:48	-250.52	0.595	0.613	-0.017
1945-11-17 16:56:35	-250.507	0.606	0.618	-0.012
1945-11-17 16:57:22	-250.494	0.617	0.624	-0.008
1945-11-17 16:58:59	-250.467	0.626	0.637	-0.01
1945-11-17 17:00:36	-250.44	0.637	0.649	-0.012
1945-11-17 17:02:13	-250.413	0.647	0.662	-0.014
1945-11-17 17:03:50	-250.386	0.658	0.674	-0.016
1945-11-17 17:05:27	-250.359	0.669	0.687	-0.018
1945-11-17 17:06:14	-250.346	0.679	0.693	-0.014
1945-11-17 17:07:51	-250.319	0.689	0.706	-0.017
1945-11-17 17:08:38	-250.306	0.7	0.713	-0.013
1945-11-17 17:10:15	-250.279	0.71	0.726	-0.016
1945-11-17 17:11:02	-250.266	0.721	0.732	-0.012
1945-11-17 17:11:49	-250.253	0.732	0.739	-0.007
1945-11-17 17:13:26	-250.226	0.742	0.752	-0.01
1945-11-17 17:14:13	-250.213	0.753	0.759	-0.006
1945-11-17 17:15:50	-250.186	0.764	0.773	-0.009
1945-11-17 17:16:37	-250.173	0.774	0.779	-0.005
1945-11-17 17:17:24	-250.16	0.785	0.786	-0.001
1945-11-17 17:18:11	-250.147	0.794	0.793	0.002
1945-11-17 17:18:58	-250.134	0.805	0.799	0.006
1945-11-17 17:19:45	-250.121	0.816	0.806	0.01
1945-11-17 17:20:32	-250.108	0.826	0.813	0.014
1945-11-17 17:22:09	-250.081	0.837	0.827	0.01
1945-11-17 17:22:56	-250.068	0.848	0.834	0.014
1945-11-17 17:23:40	-250.056	0.869	0.84	0.029
1945-11-17 17:23:43	-250.055	0.858	0.841	0.018
1945-11-17 17:24:27	-250.042	0.88	0.847	0.033
1945-11-17 17:26:04	-250.016	0.89	0.861	0.029
1945-11-17 17:26:51	-250.002	0.901	0.868	0.033
1945-11-17 17:28:28	-249.976	0.912	0.883	0.029
1945-11-17 17:29:15	-249.963	0.922	0.89	0.032
1945-11-17 17:30:53	-249.935	0.932	0.905	0.027
1945-11-17 17:31:40	-249.922	0.942	0.912	0.031
1945-11-17 17:32:27	-249.909	0.953	0.919	0.034
1945-11-17 17:34:53	-249.869	0.964	0.941	0.023
1945-11-17 17:36:30	-249.842	0.974	0.956	0.018
1945-11-17 17:38:57	-249.801	0.985	0.979	0.006
1945-11-17 17:40:34	-249.774	0.995	0.994	0.001
1945-11-17 17:42:11	-249.747	1.005	1.009	-0.004
1945-11-17 17:42:58	-249.734	1.016	1.017	-0.001
1945-11-17 17:44:35	-249.707	1.027	1.032	-0.005
1945-11-17 17:45:22	-249.694	1.037	1.039	-0.002
1945-11-17 17:46:09	-249.681	1.048	1.047	0.001
1945-11-17 17:46:56	-249.668	1.059	1.054	0.004
1945-11-17 17:47:43	-249.655	1.069	1.062	0.007
1945-11-17 17:48:30	-249.642	1.08	1.069	0.011
1945-11-17 17:49:17	-249.629	1.092	1.077	0.015
1945-11-17 17:50:04	-249.616	1.101	1.084	0.017
1945-11-17 17:50:52	-249.602	1.111	1.092	0.019
1945-11-17 17:52:29	-249.575	1.121	1.108	0.014
1945-11-17 17:54:55	-249.535	1.132	1.131	0.001
1945-11-17 17:57:23	-249.494	1.142	1.155	-0.014
1945-11-17 17:59:49	-249.453	1.152	1.179	-0.027
1945-11-17 18:01:26	-249.426	1.163	1.195	-0.032
1945-11-17 18:03:54	-249.385	1.172	1.22	-0.047
1945-11-17 18:06:20	-249.344	1.183	1.244	-0.061
1945-11-17 18:08:47	-249.304	1.193	1.268	-0.076
1945-11-17 18:10:24	-249.277	1.203	1.284	-0.081
1945-11-17 18:12:01	-249.25	1.214	1.301	-0.087
1945-11-17 18:13:38	-249.223	1.225	1.317	-0.092
1945-11-17 18:15:15	-249.196	1.235	1.333	-0.098
1945-11-17 18:16:03	-249.183	1.245	1.341	-0.096
1945-11-17 18:16:50	-249.169	1.256	1.349	-0.093
1945-11-17 18:17:37	-249.156	1.266	1.357	-0.091
1945-11-17 18:19:11	-249.13	1.287	1.373	-0.085
1945-11-17 18:19:13	-249.13	1.277	1.373	-0.096
1945-11-17 18:19:58	-249.117	1.298	1.381	-0.083
1945-11-17 18:20:45	-249.104	1.309	1.389	-0.08
1945-11-17 18:21:32	-249.091	1.319	1.396	-0.077
1945-11-17 18:22:16	-249.079	1.341	1.404	-0.063
1945-11-17 18:22:19	-249.078	1.33	1.404	-0.074
1945-11-17 18:23:03	-249.066	1.351	1.412	-0.06
1945-11-17 18:23:50	-249.053	1.362	1.42	-0.058
1945-11-17 18:24:37	-249.04	1.373	1.428	-0.055
1945-11-17 18:25:24	-249.027	1.383	1.436	-0.052
1945-11-17 18:26:11	-249.014	1.394	1.444	-0.05
1945-11-17 18:27:48	-248.987	1.405	1.46	-0.055
1945-11-17 18:28:35	-248.974	1.414	1.468	-0.054
1945-11-17 18:30:12	-248.947	1.425	1.484	-0.059
1945-11-17 18:30:59	-248.934	1.436	1.492	-0.057
[truncated: 10,990 more rows]

## Sheet: Table S2
Date and time (IST)	Hours after earthquake of 11/28/1945 0327 IST	Computed tidal height (m)
1945-11-15 00:35:00	-314.867	0.853
1945-11-15 00:36:00	-314.85	0.853
1945-11-15 00:37:00	-314.833	0.854
1945-11-15 00:38:00	-314.817	0.854
1945-11-15 00:39:00	-314.8	0.854
1945-11-15 00:40:00	-314.783	0.854
1945-11-15 00:41:00	-314.767	0.855
1945-11-15 00:42:00	-314.75	0.855
1945-11-15 00:43:00	-314.733	0.855
1945-11-15 00:44:00	-314.717	0.856
1945-11-15 00:45:00	-314.7	0.857
1945-11-15 00:46:00	-314.683	0.857
1945-11-15 00:47:00	-314.667	0.858
1945-11-15 00:48:00	-314.65	0.859
1945-11-15 00:49:00	-314.633	0.86
1945-11-15 00:50:00	-314.617	0.86
1945-11-15 00:51:00	-314.6	0.861
1945-11-15 00:52:00	-314.583	0.862
1945-11-15 00:53:00	-314.567	0.863
1945-11-15 00:54:00	-314.55	0.865
1945-11-15 00:55:00	-314.533	0.866
1945-11-15 00:56:00	-314.517	0.867
1945-11-15 00:57:00	-314.5	0.868
1945-11-15 00:58:00	-314.483	0.87
1945-11-15 00:59:00	-314.467	0.871
1945-11-15 01:00:00	-314.45	0.872
1945-11-15 01:01:00	-314.433	0.874
1945-11-15 01:02:00	-314.417	0.876
1945-11-15 01:03:00	-314.4	0.877
1945-11-15 01:04:00	-314.383	0.879
1945-11-15 01:05:00	-314.367	0.881
1945-11-15 01:06:00	-314.35	0.882
1945-11-15 01:07:00	-314.333	0.884
1945-11-15 01:08:00	-314.317	0.886
1945-11-15 01:09:00	-314.3	0.888
1945-11-15 01:10:00	-314.283	0.89
1945-11-15 01:11:00	-314.267	0.892
1945-11-15 01:12:00	-314.25	0.894
1945-11-15 01:13:00	-314.233	0.896
1945-11-15 01:14:00	-314.217	0.899
1945-11-15 01:15:00	-314.2	0.901
1945-11-15 01:16:00	-314.183	0.903
1945-11-15 01:17:00	-314.167	0.905
1945-11-15 01:18:00	-314.15	0.908
1945-11-15 01:19:00	-314.133	0.91
1945-11-15 01:20:00	-314.117	0.913
1945-11-15 01:21:00	-314.1	0.915
1945-11-15 01:22:00	-314.083	0.918
1945-11-15 01:23:00	-314.067	0.921
1945-11-15 01:24:00	-314.05	0.923
1945-11-15 01:25:00	-314.033	0.926
1945-11-15 01:26:00	-314.017	0.929
1945-11-15 01:27:00	-314	0.932
1945-11-15 01:28:00	-313.983	0.935
1945-11-15 01:29:00	-313.967	0.938
1945-11-15 01:30:00	-313.95	0.941
1945-11-15 01:31:00	-313.933	0.944
1945-11-15 01:32:00	-313.917	0.947
1945-11-15 01:33:00	-313.9	0.95
1945-11-15 01:34:00	-313.883	0.953
1945-11-15 01:35:00	-313.867	0.956
1945-11-15 01:36:00	-313.85	0.959
1945-11-15 01:37:00	-313.833	0.963
1945-11-15 01:38:00	-313.817	0.966
1945-11-15 01:39:00	-313.8	0.969
1945-11-15 01:40:00	-313.783	0.973
1945-11-15 01:41:00	-313.767	0.976
1945-11-15 01:42:00	-313.75	0.98
1945-11-15 01:43:00	-313.733	0.983
1945-11-15 01:44:00	-313.717	0.987
1945-11-15 01:45:00	-313.7	0.991
1945-11-15 01:46:00	-313.683	0.994
1945-11-15 01:47:00	-313.667	0.998
1945-11-15 01:48:00	-313.65	1.002
1945-11-15 01:49:00	-313.633	1.006
1945-11-15 01:50:00	-313.617	1.01
1945-11-15 01:51:00	-313.6	1.013
1945-11-15 01:52:00	-313.583	1.017
1945-11-15 01:53:00	-313.567	1.021
1945-11-15 01:54:00	-313.55	1.025
1945-11-15 01:55:00	-313.533	1.029
1945-11-15 01:56:00	-313.517	1.033
1945-11-15 01:57:00	-313.5	1.038
1945-11-15 01:58:00	-313.483	1.042
1945-11-15 01:59:00	-313.467	1.046
1945-11-15 02:00:00	-313.45	1.05
1945-11-15 02:01:00	-313.433	1.054
1945-11-15 02:02:00	-313.417	1.059
1945-11-15 02:03:00	-313.4	1.063
1945-11-15 02:04:00	-313.383	1.067
1945-11-15 02:05:00	-313.367	1.072
1945-11-15 02:06:00	-313.35	1.076
1945-11-15 02:07:00	-313.333	1.081
1945-11-15 02:08:00	-313.317	1.085
1945-11-15 02:09:00	-313.3	1.09
1945-11-15 02:10:00	-313.283	1.094
1945-11-15 02:11:00	-313.267	1.099
1945-11-15 02:12:00	-313.25	1.104
1945-11-15 02:13:00	-313.233	1.108
1945-11-15 02:14:00	-313.217	1.113
1945-11-15 02:15:00	-313.2	1.118
1945-11-15 02:16:00	-313.183	1.123
1945-11-15 02:17:00	-313.167	1.127
1945-11-15 02:18:00	-313.15	1.132
1945-11-15 02:19:00	-313.133	1.137
1945-11-15 02:20:00	-313.117	1.142
1945-11-15 02:21:00	-313.1	1.147
1945-11-15 02:22:00	-313.083	1.152
1945-11-15 02:23:00	-313.067	1.157
1945-11-15 02:24:00	-313.05	1.162
1945-11-15 02:25:00	-313.033	1.167
1945-11-15 02:26:00	-313.017	1.172
1945-11-15 02:27:00	-313	1.177
1945-11-15 02:28:00	-312.983	1.182
1945-11-15 02:29:00	-312.967	1.187
1945-11-15 02:30:00	-312.95	1.193
1945-11-15 02:31:00	-312.933	1.198
1945-11-15 02:32:00	-312.917	1.203
1945-11-15 02:33:00	-312.9	1.208
1945-11-15 02:34:00	-312.883	1.214
1945-11-15 02:35:00	-312.867	1.219
1945-11-15 02:36:00	-312.85	1.224
1945-11-15 02:37:00	-312.833	1.23
1945-11-15 02:38:00	-312.817	1.235
1945-11-15 02:39:00	-312.8	1.24
1945-11-15 02:40:00	-312.783	1.246
1945-11-15 02:41:00	-312.767	1.251
1945-11-15 02:42:00	-312.75	1.257
1945-11-15 02:43:00	-312.733	1.262
1945-11-15 02:44:00	-312.717	1.268
1945-11-15 02:45:00	-312.7	1.273
1945-11-15 02:46:00	-312.683	1.279
1945-11-15 02:47:00	-312.667	1.285
1945-11-15 02:48:00	-312.65	1.29
1945-11-15 02:49:00	-312.633	1.296
1945-11-15 02:50:00	-312.617	1.302
1945-11-15 02:51:00	-312.6	1.307
1945-11-15 02:52:00	-312.583	1.313
1945-11-15 02:53:00	-312.567	1.319
1945-11-15 02:54:00	-312.55	1.325
1945-11-15 02:55:00	-312.533	1.33
1945-11-15 02:56:00	-312.517	1.336
1945-11-15 02:57:00	-312.5	1.342
1945-11-15 02:58:00	-312.483	1.348
1945-11-15 02:59:00	-312.467	1.354
1945-11-15 03:00:00	-312.45	1.359
1945-11-15 03:01:00	-312.433	1.365
1945-11-15 03:02:00	-312.417	1.371
1945-11-15 03:03:00	-312.4	1.377
1945-11-15 03:04:00	-312.383	1.383
1945-11-15 03:05:00	-312.367	1.389
1945-11-15 03:06:00	-312.35	1.395
1945-11-15 03:07:00	-312.333	1.401
1945-11-15 03:08:00	-312.317	1.407
1945-11-15 03:09:00	-312.3	1.413
1945-11-15 03:10:00	-312.283	1.419
1945-11-15 03:11:00	-312.267	1.425
1945-11-15 03:12:00	-312.25	1.431
1945-11-15 03:13:00	-312.233	1.437
1945-11-15 03:14:00	-312.217	1.443
1945-11-15 03:15:00	-312.2	1.449
1945-11-15 03:16:00	-312.183	1.455
1945-11-15 03:17:00	-312.167	1.462
1945-11-15 03:18:00	-312.15	1.468
1945-11-15 03:19:00	-312.133	1.474
1945-11-15 03:20:00	-312.117	1.48
1945-11-15 03:21:00	-312.1	1.486
1945-11-15 03:22:00	-312.083	1.492
1945-11-15 03:23:00	-312.067	1.499
1945-11-15 03:24:00	-312.05	1.505
1945-11-15 03:25:00	-312.033	1.511
1945-11-15 03:26:00	-312.017	1.517
1945-11-15 03:27:00	-312	1.523
1945-11-15 03:28:00	-311.983	1.53
1945-11-15 03:29:00	-311.967	1.536
1945-11-15 03:30:00	-311.95	1.542
1945-11-15 03:31:00	-311.933	1.548
1945-11-15 03:32:00	-311.917	1.555
1945-11-15 03:33:00	-311.9	1.561
1945-11-15 03:34:00	-311.883	1.567
1945-11-15 03:35:00	-311.867	1.574
1945-11-15 03:36:00	-311.85	1.58
1945-11-15 03:37:00	-311.833	1.586
1945-11-15 03:38:00	-311.817	1.593
1945-11-15 03:39:00	-311.8	1.599
1945-11-15 03:40:00	-311.783	1.605
1945-11-15 03:41:00	-311.767	1.612
1945-11-15 03:42:00	-311.75	1.618
1945-11-15 03:43:00	-311.733	1.624
1945-11-15 03:44:00	-311.717	1.631
1945-11-15 03:45:00	-311.7	1.637
1945-11-15 03:46:00	-311.683	1.643
1945-11-15 03:47:00	-311.667	1.65
1945-11-15 03:48:00	-311.65	1.656
1945-11-15 03:49:00	-311.633	1.662
1945-11-15 03:50:00	-311.617	1.669
1945-11-15 03:51:00	-311.6	1.675
1945-11-15 03:52:00	-311.583	1.681
1945-11-15 03:53:00	-311.567	1.688
1945-11-15 03:54:00	-311.55	1.694
1945-11-15 03:55:00	-311.533	1.701
1945-11-15 03:56:00	-311.517	1.707
1945-11-15 03:57:00	-311.5	1.713
1945-11-15 03:58:00	-311.483	1.72
1945-11-15 03:59:00	-311.467	1.726
1945-11-15 04:00:00	-311.45	1.732
1945-11-15 04:01:00	-311.433	1.739
1945-11-15 04:02:00	-311.417	1.745
1945-11-15 04:03:00	-311.4	1.751
1945-11-15 04:04:00	-311.383	1.758
1945-11-15 04:05:00	-311.367	1.764
1945-11-15 04:06:00	-311.35	1.771
1945-11-15 04:07:00	-311.333	1.777
1945-11-15 04:08:00	-311.317	1.783
1945-11-15 04:09:00	-311.3	1.79
1945-11-15 04:10:00	-311.283	1.796
1945-11-15 04:11:00	-311.267	1.802
1945-11-15 04:12:00	-311.25	1.809
1945-11-15 04:13:00	-311.233	1.815
1945-11-15 04:14:00	-311.217	1.821
1945-11-15 04:15:00	-311.2	1.828
1945-11-15 04:16:00	-311.183	1.834
1945-11-15 04:17:00	-311.167	1.84
1945-11-15 04:18:00	-311.15	1.846
1945-11-15 04:19:00	-311.133	1.853
1945-11-15 04:20:00	-311.117	1.859
1945-11-15 04:21:00	-311.1	1.865
1945-11-15 04:22:00	-311.083	1.872
1945-11-15 04:23:00	-311.067	1.878
1945-11-15 04:24:00	-311.05	1.884
1945-11-15 04:25:00	-311.033	1.89
1945-11-15 04:26:00	-311.017	1.897
1945-11-15 04:27:00	-311	1.903
1945-11-15 04:28:00	-310.983	1.909
1945-11-15 04:29:00	-310.967	1.915
1945-11-15 04:30:00	-310.95	1.921
1945-11-15 04:31:00	-310.933	1.928
1945-11-15 04:32:00	-310.917	1.934
1945-11-15 04:33:00	-310.9	1.94
1945-11-15 04:34:00	-310.883	1.946
1945-11-15 04:35:00	-310.867	1.952
1945-11-15 04:36:00	-310.85	1.958
1945-11-15 04:37:00	-310.833	1.964
1945-11-15 04:38:00	-310.817	1.97
1945-11-15 04:39:00	-310.8	1.977
1945-11-15 04:40:00	-310.783	1.983
1945-11-15 04:41:00	-310.767	1.989
1945-11-15 04:42:00	-310.75	1.995
1945-11-15 04:43:00	-310.733	2.001
1945-11-15 04:44:00	-310.717	2.007
1945-11-15 04:45:00	-310.7	2.013
1945-11-15 04:46:00	-310.683	2.019
1945-11-15 04:47:00	-310.667	2.025
1945-11-15 04:48:00	-310.65	2.031
1945-11-15 04:49:00	-310.633	2.037
1945-11-15 04:50:00	-310.617	2.043
1945-11-15 04:51:00	-310.6	2.048
1945-11-15 04:52:00	-310.583	2.054
1945-11-15 04:53:00	-310.567	2.06
1945-11-15 04:54:00	-310.55	2.066
1945-11-15 04:55:00	-310.533	2.072
1945-11-15 04:56:00	-310.517	2.078
1945-11-15 04:57:00	-310.5	2.083
1945-11-15 04:58:00	-310.483	2.089
1945-11-15 04:59:00	-310.467	2.095
1945-11-15 05:00:00	-310.45	2.101
1945-11-15 05:01:00	-310.433	2.106
1945-11-15 05:02:00	-310.417	2.112
1945-11-15 05:03:00	-310.4	2.118
1945-11-15 05:04:00	-310.383	2.123
1945-11-15 05:05:00	-310.367	2.129
1945-11-15 05:06:00	-310.35	2.135
1945-11-15 05:07:00	-310.333	2.14
1945-11-15 05:08:00	-310.317	2.146
1945-11-15 05:09:00	-310.3	2.151
1945-11-15 05:10:00	-310.283	2.157
1945-11-15 05:11:00	-310.267	2.162
1945-11-15 05:12:00	-310.25	2.168
1945-11-15 05:13:00	-310.233	2.173
1945-11-15 05:14:00	-310.217	2.179
1945-11-15 05:15:00	-310.2	2.184
1945-11-15 05:16:00	-310.183	2.189
1945-11-15 05:17:00	-310.167	2.195
1945-11-15 05:18:00	-310.15	2.2
1945-11-15 05:19:00	-310.133	2.205
1945-11-15 05:20:00	-310.117	2.211
1945-11-15 05:21:00	-310.1	2.216
1945-11-15 05:22:00	-310.083	2.221
1945-11-15 05:23:00	-310.067	2.226
1945-11-15 05:24:00	-310.05	2.232
1945-11-15 05:25:00	-310.033	2.237
1945-11-15 05:26:00	-310.017	2.242
1945-11-15 05:27:00	-310	2.247
1945-11-15 05:28:00	-309.983	2.252
1945-11-15 05:29:00	-309.967	2.257
1945-11-15 05:30:00	-309.95	2.262
1945-11-15 05:31:00	-309.933	2.267
1945-11-15 05:32:00	-309.917	2.272
1945-11-15 05:33:00	-309.9	2.277
1945-11-15 05:34:00	-309.883	2.282
1945-11-15 05:35:00	-309.867	2.286
1945-11-15 05:36:00	-309.85	2.291
1945-11-15 05:37:00	-309.833	2.296
1945-11-15 05:38:00	-309.817	2.301
1945-11-15 05:39:00	-309.8	2.305
1945-11-15 05:40:00	-309.783	2.31
1945-11-15 05:41:00	-309.767	2.315
1945-11-15 05:42:00	-309.75	2.319
1945-11-15 05:43:00	-309.733	2.324
1945-11-15 05:44:00	-309.717	2.329
1945-11-15 05:45:00	-309.7	2.333
1945-11-15 05:46:00	-309.683	2.338
1945-11-15 05:47:00	-309.667	2.342
1945-11-15 05:48:00	-309.65	2.346
1945-11-15 05:49:00	-309.633	2.351
1945-11-15 05:50:00	-309.617	2.355
1945-11-15 05:51:00	-309.6	2.359
1945-11-15 05:52:00	-309.583	2.364
1945-11-15 05:53:00	-309.567	2.368
1945-11-15 05:54:00	-309.55	2.372
1945-11-15 05:55:00	-309.533	2.376
1945-11-15 05:56:00	-309.517	2.38
1945-11-15 05:57:00	-309.5	2.384
1945-11-15 05:58:00	-309.483	2.388
1945-11-15 05:59:00	-309.467	2.392
1945-11-15 06:00:00	-309.45	2.396
1945-11-15 06:01:00	-309.433	2.4
1945-11-15 06:02:00	-309.417	2.404
1945-11-15 06:03:00	-309.4	2.408
1945-11-15 06:04:00	-309.383	2.412
1945-11-15 06:05:00	-309.367	2.416
1945-11-15 06:06:00	-309.35	2.419
1945-11-15 06:07:00	-309.333	2.423
1945-11-15 06:08:00	-309.317	2.427
1945-11-15 06:09:00	-309.3	2.43
1945-11-15 06:10:00	-309.283	2.434
1945-11-15 06:11:00	-309.267	2.437
1945-11-15 06:12:00	-309.25	2.441
1945-11-15 06:13:00	-309.233	2.444
1945-11-15 06:14:00	-309.217	2.448
1945-11-15 06:15:00	-309.2	2.451
1945-11-15 06:16:00	-309.183	2.454
1945-11-15 06:17:00	-309.167	2.458
1945-11-15 06:18:00	-309.15	2.461
1945-11-15 06:19:00	-309.133	2.464
1945-11-15 06:20:00	-309.117	2.467
1945-11-15 06:21:00	-309.1	2.47
1945-11-15 06:22:00	-309.083	2.473
1945-11-15 06:23:00	-309.067	2.476
1945-11-15 06:24:00	-309.05	2.479
1945-11-15 06:25:00	-309.033	2.482
1945-11-15 06:26:00	-309.017	2.485
1945-11-15 06:27:00	-309	2.488
1945-11-15 06:28:00	-308.983	2.49
1945-11-15 06:29:00	-308.967	2.493
1945-11-15 06:30:00	-308.95	2.496
1945-11-15 06:31:00	-308.933	2.498
1945-11-15 06:32:00	-308.917	2.501
1945-11-15 06:33:00	-308.9	2.503
1945-11-15 06:34:00	-308.883	2.506
1945-11-15 06:35:00	-308.867	2.508
1945-11-15 06:36:00	-308.85	2.511
1945-11-15 06:37:00	-308.833	2.513
1945-11-15 06:38:00	-308.817	2.515
1945-11-15 06:39:00	-308.8	2.517
1945-11-15 06:40:00	-308.783	2.52
1945-11-15 06:41:00	-308.767	2.522
1945-11-15 06:42:00	-308.75	2.524
1945-11-15 06:43:00	-308.733	2.526
1945-11-15 06:44:00	-308.717	2.528
1945-11-15 06:45:00	-308.7	2.53
1945-11-15 06:46:00	-308.683	2.531
1945-11-15 06:47:00	-308.667	2.533
1945-11-15 06:48:00	-308.65	2.535
1945-11-15 06:49:00	-308.633	2.537
1945-11-15 06:50:00	-308.617	2.538
1945-11-15 06:51:00	-308.6	2.54
1945-11-15 06:52:00	-308.583	2.541
1945-11-15 06:53:00	-308.567	2.543
1945-11-15 06:54:00	-308.55	2.544
1945-11-15 06:55:00	-308.533	2.546
1945-11-15 06:56:00	-308.517	2.547
1945-11-15 06:57:00	-308.5	2.548
1945-11-15 06:58:00	-308.483	2.549
1945-11-15 06:59:00	-308.467	2.55
1945-11-15 07:00:00	-308.45	2.551
1945-11-15 07:01:00	-308.433	2.552
1945-11-15 07:02:00	-308.417	2.553
1945-11-15 07:03:00	-308.4	2.554
1945-11-15 07:04:00	-308.383	2.555
1945-11-15 07:05:00	-308.367	2.556
1945-11-15 07:06:00	-308.35	2.557
1945-11-15 07:07:00	-308.333	2.557
1945-11-15 07:08:00	-308.317	2.558
1945-11-15 07:09:00	-308.3	2.558
1945-11-15 07:10:00	-308.283	2.559
1945-11-15 07:11:00	-308.267	2.559
1945-11-15 07:12:00	-308.25	2.56
1945-11-15 07:13:00	-308.233	2.56
1945-11-15 07:14:00	-308.217	2.56
1945-11-15 07:15:00	-308.2	2.56
1945-11-15 07:16:00	-308.183	2.56
1945-11-15 07:17:00	-308.167	2.56
1945-11-15 07:18:00	-308.15	2.56
1945-11-15 07:19:00	-308.133	2.56
1945-11-15 07:20:00	-308.117	2.56
1945-11-15 07:21:00	-308.1	2.56
1945-11-15 07:22:00	-308.083	2.56
1945-11-15 07:23:00	-308.067	2.559
1945-11-15 07:24:00	-308.05	2.559
1945-11-15 07:25:00	-308.033	2.558
1945-11-15 07:26:00	-308.017	2.558
1945-11-15 07:27:00	-308	2.557
1945-11-15 07:28:00	-307.983	2.557
1945-11-15 07:29:00	-307.967	2.556
1945-11-15 07:30:00	-307.95	2.555
1945-11-15 07:31:00	-307.933	2.554
1945-11-15 07:32:00	-307.917	2.553
1945-11-15 07:33:00	-307.9	2.552
1945-11-15 07:34:00	-307.883	2.551
1945-11-15 07:35:00	-307.867	2.55
1945-11-15 07:36:00	-307.85	2.549
1945-11-15 07:37:00	-307.833	2.548
1945-11-15 07:38:00	-307.817	2.547
1945-11-15 07:39:00	-307.8	2.546
1945-11-15 07:40:00	-307.783	2.544
1945-11-15 07:41:00	-307.767	2.543
1945-11-15 07:42:00	-307.75	2.541
1945-11-15 07:43:00	-307.733	2.54
1945-11-15 07:44:00	-307.717	2.538
1945-11-15 07:45:00	-307.7	2.537
1945-11-15 07:46:00	-307.683	2.535
1945-11-15 07:47:00	-307.667	2.533
1945-11-15 07:48:00	-307.65	2.531
1945-11-15 07:49:00	-307.633	2.53
1945-11-15 07:50:00	-307.617	2.528
1945-11-15 07:51:00	-307.6	2.526
1945-11-15 07:52:00	-307.583	2.524
1945-11-15 07:53:00	-307.567	2.522
1945-11-15 07:54:00	-307.55	2.52
1945-11-15 07:55:00	-307.533	2.517
1945-11-15 07:56:00	-307.517	2.515
1945-11-15 07:57:00	-307.5	2.513
1945-11-15 07:58:00	-307.483	2.511
1945-11-15 07:59:00	-307.467	2.508
1945-11-15 08:00:00	-307.45	2.506
1945-11-15 08:01:00	-307.433	2.504
1945-11-15 08:02:00	-307.417	2.501
1945-11-15 08:03:00	-307.4	2.498
1945-11-15 08:04:00	-307.383	2.496
1945-11-15 08:05:00	-307.367	2.493
1945-11-15 08:06:00	-307.35	2.491
1945-11-15 08:07:00	-307.333	2.488
1945-11-15 08:08:00	-307.317	2.485
1945-11-15 08:09:00	-307.3	2.482
1945-11-15 08:10:00	-307.283	2.479
1945-11-15 08:11:00	-307.267	2.476
1945-11-15 08:12:00	-307.25	2.473
1945-11-15 08:13:00	-307.233	2.47
1945-11-15 08:14:00	-307.217	2.467
1945-11-15 08:15:00	-307.2	2.464
1945-11-15 08:16:00	-307.183	2.461
1945-11-15 08:17:00	-307.167	2.458
1945-11-15 08:18:00	-307.15	2.455
1945-11-15 08:19:00	-307.133	2.451
1945-11-15 08:20:00	-307.117	2.448
1945-11-15 08:21:00	-307.1	2.445
1945-11-15 08:22:00	-307.083	2.441
1945-11-15 08:23:00	-307.067	2.438
1945-11-15 08:24:00	-307.05	2.434
1945-11-15 08:25:00	-307.033	2.431
1945-11-15 08:26:00	-307.017	2.427
1945-11-15 08:27:00	-307	2.423
1945-11-15 08:28:00	-306.983	2.42
1945-11-15 08:29:00	-306.967	2.416
1945-11-15 08:30:00	-306.95	2.412
1945-11-15 08:31:00	-306.933	2.409
1945-11-15 08:32:00	-306.917	2.405
1945-11-15 08:33:00	-306.9	2.401
1945-11-15 08:34:00	-306.883	2.397
1945-11-15 08:35:00	-306.867	2.393
1945-11-15 08:36:00	-306.85	2.389
1945-11-15 08:37:00	-306.833	2.385
1945-11-15 08:38:00	-306.817	2.381
1945-11-15 08:39:00	-306.8	2.377
1945-11-15 08:40:00	-306.783	2.373
1945-11-15 08:41:00	-306.767	2.368
1945-11-15 08:42:00	-306.75	2.364
1945-11-15 08:43:00	-306.733	2.36
1945-11-15 08:44:00	-306.717	2.356
1945-11-15 08:45:00	-306.7	2.351
1945-11-15 08:46:00	-306.683	2.347
1945-11-15 08:47:00	-306.667	2.343
1945-11-15 08:48:00	-306.65	2.338
1945-11-15 08:49:00	-306.633	2.334
1945-11-15 08:50:00	-306.617	2.329
1945-11-15 08:51:00	-306.6	2.325
1945-11-15 08:52:00	-306.583	2.32
1945-11-15 08:53:00	-306.567	2.316
1945-11-15 08:54:00	-306.55	2.311
1945-11-15 08:55:00	-306.533	2.306
1945-11-15 08:56:00	-306.517	2.302
1945-11-15 08:57:00	-306.5	2.297
1945-11-15 08:58:00	-306.483	2.292
1945-11-15 08:59:00	-306.467	2.288
1945-11-15 09:00:00	-306.45	2.283
1945-11-15 09:01:00	-306.433	2.278
1945-11-15 09:02:00	-306.417	2.273
1945-11-15 09:03:00	-306.4	2.268
1945-11-15 09:04:00	-306.383	2.263
1945-11-15 09:05:00	-306.367	2.258
1945-11-15 09:06:00	-306.35	2.253
1945-11-15 09:07:00	-306.333	2.248
1945-11-15 09:08:00	-306.317	2.243
1945-11-15 09:09:00	-306.3	2.238
1945-11-15 09:10:00	-306.283	2.233
1945-11-15 09:11:00	-306.267	2.228
1945-11-15 09:12:00	-306.25	2.223
1945-11-15 09:13:00	-306.233	2.218
1945-11-15 09:14:00	-306.217	2.212
1945-11-15 09:15:00	-306.2	2.207
1945-11-15 09:16:00	-306.183	2.202
1945-11-15 09:17:00	-306.167	2.197
1945-11-15 09:18:00	-306.15	2.191
1945-11-15 09:19:00	-306.133	2.186
1945-11-15 09:20:00	-306.117	2.181
1945-11-15 09:21:00	-306.1	2.175
1945-11-15 09:22:00	-306.083	2.17
1945-11-15 09:23:00	-306.067	2.165
1945-11-15 09:24:00	-306.05	2.159
1945-11-15 09:25:00	-306.033	2.154
1945-11-15 09:26:00	-306.017	2.148
1945-11-15 09:27:00	-306	2.143
1945-11-15 09:28:00	-305.983	2.137
1945-11-15 09:29:00	-305.967	2.132
1945-11-15 09:30:00	-305.95	2.126
1945-11-15 09:31:00	-305.933	2.12
1945-11-15 09:32:00	-305.917	2.115
1945-11-15 09:33:00	-305.9	2.109
1945-11-15 09:34:00	-305.883	2.104
1945-11-15 09:35:00	-305.867	2.098
1945-11-15 09:36:00	-305.85	2.092
1945-11-15 09:37:00	-305.833	2.087
1945-11-15 09:38:00	-305.817	2.081
1945-11-15 09:39:00	-305.8	2.075
1945-11-15 09:40:00	-305.783	2.069
1945-11-15 09:41:00	-305.767	2.064
1945-11-15 09:42:00	-305.75	2.058
1945-11-15 09:43:00	-305.733	2.052
1945-11-15 09:44:00	-305.717	2.046
1945-11-15 09:45:00	-305.7	2.04
1945-11-15 09:46:00	-305.683	2.034
1945-11-15 09:47:00	-305.667	2.029
1945-11-15 09:48:00	-305.65	2.023
1945-11-15 09:49:00	-305.633	2.017
1945-11-15 09:50:00	-305.617	2.011
1945-11-15 09:51:00	-305.6	2.005
1945-11-15 09:52:00	-305.583	1.999
1945-11-15 09:53:00	-305.567	1.993
1945-11-15 09:54:00	-305.55	1.987
1945-11-15 09:55:00	-305.533	1.981
1945-11-15 09:56:00	-305.517	1.975
1945-11-15 09:57:00	-305.5	1.969
1945-11-15 09:58:00	-305.483	1.963
1945-11-15 09:59:00	-305.467	1.957
1945-11-15 10:00:00	-305.45	1.951
1945-11-15 10:01:00	-305.433	1.945
1945-11-15 10:02:00	-305.417	1.939
1945-11-15 10:03:00	-305.4	1.933
1945-11-15 10:04:00	-305.383	1.927
1945-11-15 10:05:00	-305.367	1.921
1945-11-15 10:06:00	-305.35	1.914
1945-11-15 10:07:00	-305.333	1.908
1945-11-15 10:08:00	-305.317	1.902
1945-11-15 10:09:00	-305.3	1.896
1945-11-15 10:10:00	-305.283	1.89
1945-11-15 10:11:00	-305.267	1.884
1945-11-15 10:12:00	-305.25	1.878
1945-11-15 10:13:00	-305.233	1.872
1945-11-15 10:14:00	-305.217	1.865
1945-11-15 10:15:00	-305.2	1.859
1945-11-15 10:16:00	-305.183	1.853
1945-11-15 10:17:00	-305.167	1.847
1945-11-15 10:18:00	-305.15	1.841
1945-11-15 10:19:00	-305.133	1.834
1945-11-15 10:20:00	-305.117	1.828
1945-11-15 10:21:00	-305.1	1.822
1945-11-15 10:22:00	-305.083	1.816
1945-11-15 10:23:00	-305.067	1.81
1945-11-15 10:24:00	-305.05	1.803
1945-11-15 10:25:00	-305.033	1.797
1945-11-15 10:26:00	-305.017	1.791
1945-11-15 10:27:00	-305	1.785
1945-11-15 10:28:00	-304.983	1.779
1945-11-15 10:29:00	-304.967	1.772
1945-11-15 10:30:00	-304.95	1.766
1945-11-15 10:31:00	-304.933	1.76
1945-11-15 10:32:00	-304.917	1.754
1945-11-15 10:33:00	-304.9	1.747
1945-11-15 10:34:00	-304.883	1.741
1945-11-15 10:35:00	-304.867	1.735
1945-11-15 10:36:00	-304.85	1.729
1945-11-15 10:37:00	-304.833	1.723
1945-11-15 10:38:00	-304.817	1.716
1945-11-15 10:39:00	-304.8	1.71
1945-11-15 10:40:00	-304.783	1.704
1945-11-15 10:41:00	-304.767	1.698
1945-11-15 10:42:00	-304.75	1.691
1945-11-15 10:43:00	-304.733	1.685
1945-11-15 10:44:00	-304.717	1.679
1945-11-15 10:45:00	-304.7	1.673
1945-11-15 10:46:00	-304.683	1.667
1945-11-15 10:47:00	-304.667	1.66
1945-11-15 10:48:00	-304.65	1.654
1945-11-15 10:49:00	-304.633	1.648
1945-11-15 10:50:00	-304.617	1.642
1945-11-15 10:51:00	-304.6	1.636
1945-11-15 10:52:00	-304.583	1.629
1945-11-15 10:53:00	-304.567	1.623
1945-11-15 10:54:00	-304.55	1.617
1945-11-15 10:55:00	-304.533	1.611
1945-11-15 10:56:00	-304.517	1.605
1945-11-15 10:57:00	-304.5	1.599
1945-11-15 10:58:00	-304.483	1.593
1945-11-15 10:59:00	-304.467	1.586
1945-11-15 11:00:00	-304.45	1.58
1945-11-15 11:01:00	-304.433	1.574
1945-11-15 11:02:00	-304.417	1.568
1945-11-15 11:03:00	-304.4	1.562
1945-11-15 11:04:00	-304.383	1.556
1945-11-15 11:05:00	-304.367	1.55
1945-11-15 11:06:00	-304.35	1.544
1945-11-15 11:07:00	-304.333	1.538
1945-11-15 11:08:00	-304.317	1.532
1945-11-15 11:09:00	-304.3	1.526
1945-11-15 11:10:00	-304.283	1.52
1945-11-15 11:11:00	-304.267	1.514
1945-11-15 11:12:00	-304.25	1.508
1945-11-15 11:13:00	-304.233	1.502
1945-11-15 11:14:00	-304.217	1.496
1945-11-15 11:15:00	-304.2	1.49
1945-11-15 11:16:00	-304.183	1.484
1945-11-15 11:17:00	-304.167	1.478
1945-11-15 11:18:00	-304.15	1.472
1945-11-15 11:19:00	-304.133	1.466
1945-11-15 11:20:00	-304.117	1.46
1945-11-15 11:21:00	-304.1	1.454
1945-11-15 11:22:00	-304.083	1.448
1945-11-15 11:23:00	-304.067	1.443
1945-11-15 11:24:00	-304.05	1.437
1945-11-15 11:25:00	-304.033	1.431
1945-11-15 11:26:00	-304.017	1.425
1945-11-15 11:27:00	-304	1.419
1945-11-15 11:28:00	-303.983	1.414
1945-11-15 11:29:00	-303.967	1.408
1945-11-15 11:30:00	-303.95	1.402
1945-11-15 11:31:00	-303.933	1.396
1945-11-15 11:32:00	-303.917	1.391
1945-11-15 11:33:00	-303.9	1.385
1945-11-15 11:34:00	-303.883	1.379
1945-11-15 11:35:00	-303.867	1.374
1945-11-15 11:36:00	-303.85	1.368
1945-11-15 11:37:00	-303.833	1.363
1945-11-15 11:38:00	-303.817	1.357
1945-11-15 11:39:00	-303.8	1.352
1945-11-15 11:40:00	-303.783	1.346
1945-11-15 11:41:00	-303.767	1.34
1945-11-15 11:42:00	-303.75	1.335
1945-11-15 11:43:00	-303.733	1.33
1945-11-15 11:44:00	-303.717	1.324
1945-11-15 11:45:00	-303.7	1.319
1945-11-15 11:46:00	-303.683	1.313
1945-11-15 11:47:00	-303.667	1.308
1945-11-15 11:48:00	-303.65	1.303
1945-11-15 11:49:00	-303.633	1.297
1945-11-15 11:50:00	-303.617	1.292
1945-11-15 11:51:00	-303.6	1.287
1945-11-15 11:52:00	-303.583	1.281
1945-11-15 11:53:00	-303.567	1.276
1945-11-15 11:54:00	-303.55	1.271
1945-11-15 11:55:00	-303.533	1.266
1945-11-15 11:56:00	-303.517	1.261
1945-11-15 11:57:00	-303.5	1.256
1945-11-15 11:58:00	-303.483	1.251
1945-11-15 11:59:00	-303.467	1.245
1945-11-15 12:00:00	-303.45	1.24
1945-11-15 12:01:00	-303.433	1.235
1945-11-15 12:02:00	-303.417	1.23
1945-11-15 12:03:00	-303.4	1.226
1945-11-15 12:04:00	-303.383	1.221
1945-11-15 12:05:00	-303.367	1.216
1945-11-15 12:06:00	-303.35	1.211
1945-11-15 12:07:00	-303.333	1.206
1945-11-15 12:08:00	-303.317	1.201
1945-11-15 12:09:00	-303.3	1.196
1945-11-15 12:10:00	-303.283	1.192
1945-11-15 12:11:00	-303.267	1.187
1945-11-15 12:12:00	-303.25	1.182
1945-11-15 12:13:00	-303.233	1.178
1945-11-15 12:14:00	-303.217	1.173
1945-11-15 12:15:00	-303.2	1.168
1945-11-15 12:16:00	-303.183	1.164
1945-11-15 12:17:00	-303.167	1.159
1945-11-15 12:18:00	-303.15	1.155
1945-11-15 12:19:00	-303.133	1.151
1945-11-15 12:20:00	-303.117	1.146
1945-11-15 12:21:00	-303.1	1.142
1945-11-15 12:22:00	-303.083	1.137
1945-11-15 12:23:00	-303.067	1.133
1945-11-15 12:24:00	-303.05	1.129
1945-11-15 12:25:00	-303.033	1.125
1945-11-15 12:26:00	-303.017	1.12
1945-11-15 12:27:00	-303	1.116
1945-11-15 12:28:00	-302.983	1.112
1945-11-15 12:29:00	-302.967	1.108
1945-11-15 12:30:00	-302.95	1.104
1945-11-15 12:31:00	-302.933	1.1
1945-11-15 12:32:00	-302.917	1.096
1945-11-15 12:33:00	-302.9	1.092
1945-11-15 12:34:00	-302.883	1.088
1945-11-15 12:35:00	-302.867	1.084
1945-11-15 12:36:00	-302.85	1.08
1945-11-15 12:37:00	-302.833	1.077
1945-11-15 12:38:00	-302.817	1.073
1945-11-15 12:39:00	-302.8	1.069
1945-11-15 12:40:00	-302.783	1.065
1945-11-15 12:41:00	-302.767	1.062
1945-11-15 12:42:00	-302.75	1.058
1945-11-15 12:43:00	-302.733	1.055
1945-11-15 12:44:00	-302.717	1.051
1945-11-15 12:45:00	-302.7	1.048
1945-11-15 12:46:00	-302.683	1.044
1945-11-15 12:47:00	-302.667	1.041
1945-11-15 12:48:00	-302.65	1.038
1945-11-15 12:49:00	-302.633	1.034
1945-11-15 12:50:00	-302.617	1.031
1945-11-15 12:51:00	-302.6	1.028
1945-11-15 12:52:00	-302.583	1.025
1945-11-15 12:53:00	-302.567	1.022
1945-11-15 12:54:00	-302.55	1.019
1945-11-15 12:55:00	-302.533	1.016
1945-11-15 12:56:00	-302.517	1.013
1945-11-15 12:57:00	-302.5	1.01
1945-11-15 12:58:00	-302.483	1.007
1945-11-15 12:59:00	-302.467	1.004
1945-11-15 13:00:00	-302.45	1.001
1945-11-15 13:01:00	-302.433	0.998
1945-11-15 13:02:00	-302.417	0.996
1945-11-15 13:03:00	-302.4	0.993
1945-11-15 13:04:00	-302.383	0.991
1945-11-15 13:05:00	-302.367	0.988
1945-11-15 13:06:00	-302.35	0.986
1945-11-15 13:07:00	-302.333	0.983
1945-11-15 13:08:00	-302.317	0.981
1945-11-15 13:09:00	-302.3	0.978
1945-11-15 13:10:00	-302.283	0.976
1945-11-15 13:11:00	-302.267	0.974
1945-11-15 13:12:00	-302.25	0.972
1945-11-15 13:13:00	-302.233	0.969
1945-11-15 13:14:00	-302.217	0.967
1945-11-15 13:15:00	-302.2	0.965
1945-11-15 13:16:00	-302.183	0.963
1945-11-15 13:17:00	-302.167	0.961
1945-11-15 13:18:00	-302.15	0.959
1945-11-15 13:19:00	-302.133	0.958
1945-11-15 13:20:00	-302.117	0.956
1945-11-15 13:21:00	-302.1	0.954
1945-11-15 13:22:00	-302.083	0.952
1945-11-15 13:23:00	-302.067	0.951
1945-11-15 13:24:00	-302.05	0.949
1945-11-15 13:25:00	-302.033	0.948
1945-11-15 13:26:00	-302.017	0.946
1945-11-15 13:27:00	-302	0.945
1945-11-15 13:28:00	-301.983	0.944
1945-11-15 13:29:00	-301.967	0.942
1945-11-15 13:30:00	-301.95	0.941
1945-11-15 13:31:00	-301.933	0.94
1945-11-15 13:32:00	-301.917	0.939
1945-11-15 13:33:00	-301.9	0.938
1945-11-15 13:34:00	-301.883	0.937
1945-11-15 13:35:00	-301.867	0.936
1945-11-15 13:36:00	-301.85	0.935
1945-11-15 13:37:00	-301.833	0.934
1945-11-15 13:38:00	-301.817	0.933
1945-11-15 13:39:00	-301.8	0.933
1945-11-15 13:40:00	-301.783	0.932
1945-11-15 13:41:00	-301.767	0.931
1945-11-15 13:42:00	-301.75	0.931
1945-11-15 13:43:00	-301.733	0.93
1945-11-15 13:44:00	-301.717	0.93
1945-11-15 13:45:00	-301.7	0.93
1945-11-15 13:46:00	-301.683	0.929
1945-11-15 13:47:00	-301.667	0.929
1945-11-15 13:48:00	-301.65	0.929
1945-11-15 13:49:00	-301.633	0.929
1945-11-15 13:50:00	-301.617	0.929
1945-11-15 13:51:00	-301.6	0.929
1945-11-15 13:52:00	-301.583	0.929
1945-11-15 13:53:00	-301.567	0.929
1945-11-15 13:54:00	-301.55	0.93
1945-11-15 13:55:00	-301.533	0.93
1945-11-15 13:56:00	-301.517	0.93
1945-11-15 13:57:00	-301.5	0.931
1945-11-15 13:58:00	-301.483	0.931
1945-11-15 13:59:00	-301.467	0.932
1945-11-15 14:00:00	-301.45	0.932
1945-11-15 14:01:00	-301.433	0.933
1945-11-15 14:02:00	-301.417	0.933
1945-11-15 14:03:00	-301.4	0.934
1945-11-15 14:04:00	-301.383	0.935
1945-11-15 14:05:00	-301.367	0.936
1945-11-15 14:06:00	-301.35	0.937
1945-11-15 14:07:00	-301.333	0.938
1945-11-15 14:08:00	-301.317	0.939
1945-11-15 14:09:00	-301.3	0.94
1945-11-15 14:10:00	-301.283	0.941
1945-11-15 14:11:00	-301.267	0.942
1945-11-15 14:12:00	-301.25	0.944
1945-11-15 14:13:00	-301.233	0.945
1945-11-15 14:14:00	-301.217	0.946
1945-11-15 14:15:00	-301.2	0.948
1945-11-15 14:16:00	-301.183	0.949
1945-11-15 14:17:00	-301.167	0.951
1945-11-15 14:18:00	-301.15	0.952
1945-11-15 14:19:00	-301.133	0.954
1945-11-15 14:20:00	-301.117	0.955
1945-11-15 14:21:00	-301.1	0.957
1945-11-15 14:22:00	-301.083	0.959
1945-11-15 14:23:00	-301.067	0.961
1945-11-15 14:24:00	-301.05	0.963
1945-11-15 14:25:00	-301.033	0.965
1945-11-15 14:26:00	-301.017	0.967
1945-11-15 14:27:00	-301	0.969
1945-11-15 14:28:00	-300.983	0.971
1945-11-15 14:29:00	-300.967	0.973
1945-11-15 14:30:00	-300.95	0.975
1945-11-15 14:31:00	-300.933	0.977
1945-11-15 14:32:00	-300.917	0.98
1945-11-15 14:33:00	-300.9	0.982
1945-11-15 14:34:00	-300.883	0.984
1945-11-15 14:35:00	-300.867	0.987
1945-11-15 14:36:00	-300.85	0.989
1945-11-15 14:37:00	-300.833	0.992
1945-11-15 14:38:00	-300.817	0.994
1945-11-15 14:39:00	-300.8	0.997
1945-11-15 14:40:00	-300.783	0.999
1945-11-15 14:41:00	-300.767	1.002
1945-11-15 14:42:00	-300.75	1.005
1945-11-15 14:43:00	-300.733	1.008
1945-11-15 14:44:00	-300.717	1.01
1945-11-15 14:45:00	-300.7	1.013
1945-11-15 14:46:00	-300.683	1.016
1945-11-15 14:47:00	-300.667	1.019
1945-11-15 14:48:00	-300.65	1.022
1945-11-15 14:49:00	-300.633	1.025
1945-11-15 14:50:00	-300.617	1.028
1945-11-15 14:51:00	-300.6	1.031
1945-11-15 14:52:00	-300.583	1.035
1945-11-15 14:53:00	-300.567	1.038
1945-11-15 14:54:00	-300.55	1.041
1945-11-15 14:55:00	-300.533	1.044
1945-11-15 14:56:00	-300.517	1.048
1945-11-15 14:57:00	-300.5	1.051
1945-11-15 14:58:00	-300.483	1.054
1945-11-15 14:59:00	-300.467	1.058
1945-11-15 15:00:00	-300.45	1.061
1945-11-15 15:01:00	-300.433	1.065
1945-11-15 15:02:00	-300.417	1.068
1945-11-15 15:03:00	-300.4	1.072
1945-11-15 15:04:00	-300.383	1.076
1945-11-15 15:05:00	-300.367	1.079
1945-11-15 15:06:00	-300.35	1.083
1945-11-15 15:07:00	-300.333	1.087
1945-11-15 15:08:00	-300.317	1.09
1945-11-15 15:09:00	-300.3	1.094
1945-11-15 15:10:00	-300.283	1.098
1945-11-15 15:11:00	-300.267	1.102
1945-11-15 15:12:00	-300.25	1.106
1945-11-15 15:13:00	-300.233	1.11
1945-11-15 15:14:00	-300.217	1.114
1945-11-15 15:15:00	-300.2	1.118
1945-11-15 15:16:00	-300.183	1.122
1945-11-15 15:17:00	-300.167	1.126
1945-11-15 15:18:00	-300.15	1.13
1945-11-15 15:19:00	-300.133	1.134
1945-11-15 15:20:00	-300.117	1.138
1945-11-15 15:21:00	-300.1	1.142
1945-11-15 15:22:00	-300.083	1.147
1945-11-15 15:23:00	-300.067	1.151
1945-11-15 15:24:00	-300.05	1.155
1945-11-15 15:25:00	-300.033	1.159
1945-11-15 15:26:00	-300.017	1.164
1945-11-15 15:27:00	-300	1.168
1945-11-15 15:28:00	-299.983	1.172
1945-11-15 15:29:00	-299.967	1.177
1945-11-15 15:30:00	-299.95	1.181
1945-11-15 15:31:00	-299.933	1.186
1945-11-15 15:32:00	-299.917	1.19
1945-11-15 15:33:00	-299.9	1.195
1945-11-15 15:34:00	-299.883	1.199
1945-11-15 15:35:00	-299.867	1.204
1945-11-15 15:36:00	-299.85	1.209
1945-11-15 15:37:00	-299.833	1.213
1945-11-15 15:38:00	-299.817	1.218
1945-11-15 15:39:00	-299.8	1.223
1945-11-15 15:40:00	-299.783	1.227
1945-11-15 15:41:00	-299.767	1.232
1945-11-15 15:42:00	-299.75	1.237
1945-11-15 15:43:00	-299.733	1.242
1945-11-15 15:44:00	-299.717	1.246
1945-11-15 15:45:00	-299.7	1.251
1945-11-15 15:46:00	-299.683	1.256
1945-11-15 15:47:00	-299.667	1.261
1945-11-15 15:48:00	-299.65	1.266
1945-11-15 15:49:00	-299.633	1.271
1945-11-15 15:50:00	-299.617	1.276
1945-11-15 15:51:00	-299.6	1.281
1945-11-15 15:52:00	-299.583	1.286
1945-11-15 15:53:00	-299.567	1.291
1945-11-15 15:54:00	-299.55	1.296
1945-11-15 15:55:00	-299.533	1.301
1945-11-15 15:56:00	-299.517	1.306
1945-11-15 15:57:00	-299.5	1.311
1945-11-15 15:58:00	-299.483	1.316
1945-11-15 15:59:00	-299.467	1.321
1945-11-15 16:00:00	-299.45	1.326
1945-11-15 16:01:00	-299.433	1.331
1945-11-15 16:02:00	-299.417	1.336
1945-11-15 16:03:00	-299.4	1.341
1945-11-15 16:04:00	-299.383	1.347
1945-11-15 16:05:00	-299.367	1.352
1945-11-15 16:06:00	-299.35	1.357
1945-11-15 16:07:00	-299.333	1.362
1945-11-15 16:08:00	-299.317	1.367
1945-11-15 16:09:00	-299.3	1.373
1945-11-15 16:10:00	-299.283	1.378
1945-11-15 16:11:00	-299.267	1.383
1945-11-15 16:12:00	-299.25	1.389
1945-11-15 16:13:00	-299.233	1.394
1945-11-15 16:14:00	-299.217	1.399
1945-11-15 16:15:00	-299.2	1.405
1945-11-15 16:16:00	-299.183	1.41
1945-11-15 16:17:00	-299.167	1.415
1945-11-15 16:18:00	-299.15	1.421
1945-11-15 16:19:00	-299.133	1.426
1945-11-15 16:20:00	-299.117	1.431
1945-11-15 16:21:00	-299.1	1.437
1945-11-15 16:22:00	-299.083	1.442
1945-11-15 16:23:00	-299.067	1.448
1945-11-15 16:24:00	-299.05	1.453
1945-11-15 16:25:00	-299.033	1.458
1945-11-15 16:26:00	-299.017	1.464
1945-11-15 16:27:00	-299	1.469
1945-11-15 16:28:00	-298.983	1.475
1945-11-15 16:29:00	-298.967	1.48
1945-11-15 16:30:00	-298.95	1.486
1945-11-15 16:31:00	-298.933	1.491
1945-11-15 16:32:00	-298.917	1.497
1945-11-15 16:33:00	-298.9	1.502
1945-11-15 16:34:00	-298.883	1.508
1945-11-15 16:35:00	-298.867	1.513
1945-11-15 16:36:00	-298.85	1.519
1945-11-15 16:37:00	-298.833	1.524
1945-11-15 16:38:00	-298.817	1.53
1945-11-15 16:39:00	-298.8	1.535
1945-11-15 16:40:00	-298.783	1.541
1945-11-15 16:41:00	-298.767	1.546
1945-11-15 16:42:00	-298.75	1.552
1945-11-15 16:43:00	-298.733	1.557
1945-11-15 16:44:00	-298.717	1.563
1945-11-15 16:45:00	-298.7	1.568
1945-11-15 16:46:00	-298.683	1.574
1945-11-15 16:47:00	-298.667	1.579
1945-11-15 16:48:00	-298.65	1.585
1945-11-15 16:49:00	-298.633	1.591
1945-11-15 16:50:00	-298.617	1.596
1945-11-15 16:51:00	-298.6	1.602
1945-11-15 16:52:00	-298.583	1.607
1945-11-15 16:53:00	-298.567	1.613
1945-11-15 16:54:00	-298.55	1.618
1945-11-15 16:55:00	-298.533	1.624
1945-11-15 16:56:00	-298.517	1.629
1945-11-15 16:57:00	-298.5	1.635
1945-11-15 16:58:00	-298.483	1.64
1945-11-15 16:59:00	-298.467	1.646
1945-11-15 17:00:00	-298.45	1.651
1945-11-15 17:01:00	-298.433	1.657
1945-11-15 17:02:00	-298.417	1.662
1945-11-15 17:03:00	-298.4	1.668
1945-11-15 17:04:00	-298.383	1.673
1945-11-15 17:05:00	-298.367	1.679
1945-11-15 17:06:00	-298.35	1.684
1945-11-15 17:07:00	-298.333	1.69
1945-11-15 17:08:00	-298.317	1.695
1945-11-15 17:09:00	-298.3	1.701
1945-11-15 17:10:00	-298.283	1.706
1945-11-15 17:11:00	-298.267	1.712
1945-11-15 17:12:00	-298.25	1.717
1945-11-15 17:13:00	-298.233	1.723
1945-11-15 17:14:00	-298.217	1.728
1945-11-15 17:15:00	-298.2	1.733
1945-11-15 17:16:00	-298.183	1.739
1945-11-15 17:17:00	-298.167	1.744
1945-11-15 17:18:00	-298.15	1.75
1945-11-15 17:19:00	-298.133	1.755
1945-11-15 17:20:00	-298.117	1.76
1945-11-15 17:21:00	-298.1	1.766
1945-11-15 17:22:00	-298.083	1.771
1945-11-15 17:23:00	-298.067	1.776
1945-11-15 17:24:00	-298.05	1.782
1945-11-15 17:25:00	-298.033	1.787
1945-11-15 17:26:00	-298.017	1.792
1945-11-15 17:27:00	-298	1.798
1945-11-15 17:28:00	-297.983	1.803
1945-11-15 17:29:00	-297.967	1.808
1945-11-15 17:30:00	-297.95	1.813
1945-11-15 17:31:00	-297.933	1.819
1945-11-15 17:32:00	-297.917	1.824
1945-11-15 17:33:00	-297.9	1.829
1945-11-15 17:34:00	-297.883	1.834
1945-11-15 17:35:00	-297.867	1.839
1945-11-15 17:36:00	-297.85	1.845
1945-11-15 17:37:00	-297.833	1.85
1945-11-15 17:38:00	-297.817	1.855
1945-11-15 17:39:00	-297.8	1.86
1945-11-15 17:40:00	-297.783	1.865
1945-11-15 17:41:00	-297.767	1.87
1945-11-15 17:42:00	-297.75	1.875
1945-11-15 17:43:00	-297.733	1.88
1945-11-15 17:44:00	-297.717	1.885
1945-11-15 17:45:00	-297.7	1.89
1945-11-15 17:46:00	-297.683	1.895
1945-11-15 17:47:00	-297.667	1.9
1945-11-15 17:48:00	-297.65	1.905
1945-11-15 17:49:00	-297.633	1.91
1945-11-15 17:50:00	-297.617	1.915
1945-11-15 17:51:00	-297.6	1.92
1945-11-15 17:52:00	-297.583	1.925
1945-11-15 17:53:00	-297.567	1.93
1945-11-15 17:54:00	-297.55	1.934
1945-11-15 17:55:00	-297.533	1.939
1945-11-15 17:56:00	-297.517	1.944
1945-11-15 17:57:00	-297.5	1.949
1945-11-15 17:58:00	-297.483	1.953
1945-11-15 17:59:00	-297.467	1.958
1945-11-15 18:00:00	-297.45	1.963
1945-11-15 18:01:00	-297.433	1.967
1945-11-15 18:02:00	-297.417	1.972
1945-11-15 18:03:00	-297.4	1.977
1945-11-15 18:04:00	-297.383	1.981
1945-11-15 18:05:00	-297.367	1.986
1945-11-15 18:06:00	-297.35	1.99
1945-11-15 18:07:00	-297.333	1.995
1945-11-15 18:08:00	-297.317	1.999
1945-11-15 18:09:00	-297.3	2.004
1945-11-15 18:10:00	-297.283	2.008
1945-11-15 18:11:00	-297.267	2.012
1945-11-15 18:12:00	-297.25	2.017
1945-11-15 18:13:00	-297.233	2.021
1945-11-15 18:14:00	-297.217	2.025
1945-11-15 18:15:00	-297.2	2.03
1945-11-15 18:16:00	-297.183	2.034
1945-11-15 18:17:00	-297.167	2.038
1945-11-15 18:18:00	-297.15	2.042
1945-11-15 18:19:00	-297.133	2.046
1945-11-15 18:20:00	-297.117	2.05
1945-11-15 18:21:00	-297.1	2.055
1945-11-15 18:22:00	-297.083	2.059
1945-11-15 18:23:00	-297.067	2.063
1945-11-15 18:24:00	-297.05	2.067
1945-11-15 18:25:00	-297.033	2.071
1945-11-15 18:26:00	-297.017	2.074
1945-11-15 18:27:00	-297	2.078
1945-11-15 18:28:00	-296.983	2.082
1945-11-15 18:29:00	-296.967	2.086
1945-11-15 18:30:00	-296.95	2.09
1945-11-15 18:31:00	-296.933	2.094
1945-11-15 18:32:00	-296.917	2.097
1945-11-15 18:33:00	-296.9	2.101
1945-11-15 18:34:00	-296.883	2.105
1945-11-15 18:35:00	-296.867	2.108
1945-11-15 18:36:00	-296.85	2.112
1945-11-15 18:37:00	-296.833	2.115
1945-11-15 18:38:00	-296.817	2.119
1945-11-15 18:39:00	-296.8	2.122
1945-11-15 18:40:00	-296.783	2.126
1945-11-15 18:41:00	-296.767	2.129
1945-11-15 18:42:00	-296.75	2.132
1945-11-15 18:43:00	-296.733	2.136
1945-11-15 18:44:00	-296.717	2.139
1945-11-15 18:45:00	-296.7	2.142
1945-11-15 18:46:00	-296.683	2.145
1945-11-15 18:47:00	-296.667	2.148
1945-11-15 18:48:00	-296.65	2.151
1945-11-15 18:49:00	-296.633	2.155
1945-11-15 18:50:00	-296.617	2.158
1945-11-15 18:51:00	-296.6	2.16
1945-11-15 18:52:00	-296.583	2.163
1945-11-15 18:53:00	-296.567	2.166
1945-11-15 18:54:00	-296.55	2.169
1945-11-15 18:55:00	-296.533	2.172
1945-11-15 18:56:00	-296.517	2.175
1945-11-15 18:57:00	-296.5	2.177
1945-11-15 18:58:00	-296.483	2.18
1945-11-15 18:59:00	-296.467	2.183
1945-11-15 19:00:00	-296.45	2.185
1945-11-15 19:01:00	-296.433	2.188
1945-11-15 19:02:00	-296.417	2.19
1945-11-15 19:03:00	-296.4	2.193
1945-11-15 19:04:00	-296.383	2.195
1945-11-15 19:05:00	-296.367	2.197
1945-11-15 19:06:00	-296.35	2.2
1945-11-15 19:07:00	-296.333	2.202
1945-11-15 19:08:00	-296.317	2.204
1945-11-15 19:09:00	-296.3	2.206
1945-11-15 19:10:00	-296.283	2.208
1945-11-15 19:11:00	-296.267	2.211
1945-11-15 19:12:00	-296.25	2.213
1945-11-15 19:13:00	-296.233	2.215
1945-11-15 19:14:00	-296.217	2.216
1945-11-15 19:15:00	-296.2	2.218
1945-11-15 19:16:00	-296.183	2.22
1945-11-15 19:17:00	-296.167	2.222
1945-11-15 19:18:00	-296.15	2.224
1945-11-15 19:19:00	-296.133	2.225
1945-11-15 19:20:00	-296.117	2.227
1945-11-15 19:21:00	-296.1	2.228
1945-11-15 19:22:00	-296.083	2.23
1945-11-15 19:23:00	-296.067	2.231
1945-11-15 19:24:00	-296.05	2.233
1945-11-15 19:25:00	-296.033	2.234
1945-11-15 19:26:00	-296.017	2.235
1945-11-15 19:27:00	-296	2.237
1945-11-15 19:28:00	-295.983	2.238
1945-11-15 19:29:00	-295.967	2.239
1945-11-15 19:30:00	-295.95	2.24
1945-11-15 19:31:00	-295.933	2.241
1945-11-15 19:32:00	-295.917	2.242
1945-11-15 19:33:00	-295.9	2.243
1945-11-15 19:34:00	-295.883	2.244
1945-11-15 19:35:00	-295.867	2.244
1945-11-15 19:36:00	-295.85	2.245
1945-11-15 19:37:00	-295.833	2.246
1945-11-15 19:38:00	-295.817	2.246
1945-11-15 19:39:00	-295.8	2.247
1945-11-15 19:40:00	-295.783	2.247
1945-11-15 19:41:00	-295.767	2.248
1945-11-15 19:42:00	-295.75	2.248
1945-11-15 19:43:00	-295.733	2.248
1945-11-15 19:44:00	-295.717	2.249
1945-11-15 19:45:00	-295.7	2.249
1945-11-15 19:46:00	-295.683	2.249
1945-11-15 19:47:00	-295.667	2.249
1945-11-15 19:48:00	-295.65	2.249
1945-11-15 19:49:00	-295.633	2.249
1945-11-15 19:50:00	-295.617	2.249
1945-11-15 19:51:00	-295.6	2.249
1945-11-15 19:52:00	-295.583	2.248
1945-11-15 19:53:00	-295.567	2.248
1945-11-15 19:54:00	-295.55	2.248
1945-11-15 19:55:00	-295.533	2.247
1945-11-15 19:56:00	-295.517	2.247
1945-11-15 19:57:00	-295.5	2.246
1945-11-15 19:58:00	-295.483	2.246
1945-11-15 19:59:00	-295.467	2.245
1945-11-15 20:00:00	-295.45	2.244
1945-11-15 20:01:00	-295.433	2.243
1945-11-15 20:02:00	-295.417	2.242
1945-11-15 20:03:00	-295.4	2.241
1945-11-15 20:04:00	-295.383	2.24
1945-11-15 20:05:00	-295.367	2.239
1945-11-15 20:06:00	-295.35	2.238
1945-11-15 20:07:00	-295.333	2.237
1945-11-15 20:08:00	-295.317	2.236
1945-11-15 20:09:00	-295.3	2.234
1945-11-15 20:10:00	-295.283	2.233
1945-11-15 20:11:00	-295.267	2.231
1945-11-15 20:12:00	-295.25	2.23
1945-11-15 20:13:00	-295.233	2.228
1945-11-15 20:14:00	-295.217	2.227
1945-11-15 20:15:00	-295.2	2.225
1945-11-15 20:16:00	-295.183	2.223
1945-11-15 20:17:00	-295.167	2.222
1945-11-15 20:18:00	-295.15	2.22
1945-11-15 20:19:00	-295.133	2.218
1945-11-15 20:20:00	-295.117	2.216
1945-11-15 20:21:00	-295.1	2.214
1945-11-15 20:22:00	-295.083	2.212
1945-11-15 20:23:00	-295.067	2.21
1945-11-15 20:24:00	-295.05	2.208
1945-11-15 20:25:00	-295.033	2.205
1945-11-15 20:26:00	-295.017	2.203
1945-11-15 20:27:00	-295	2.201
1945-11-15 20:28:00	-294.983	2.198
1945-11-15 20:29:00	-294.967	2.196
1945-11-15 20:30:00	-294.95	2.193
1945-11-15 20:31:00	-294.933	2.191
1945-11-15 20:32:00	-294.917	2.188
1945-11-15 20:33:00	-294.9	2.186
1945-11-15 20:34:00	-294.883	2.183
1945-11-15 20:35:00	-294.867	2.18
1945-11-15 20:36:00	-294.85	2.178
1945-11-15 20:37:00	-294.833	2.175
1945-11-15 20:38:00	-294.817	2.172
1945-11-15 20:39:00	-294.8	2.169
1945-11-15 20:40:00	-294.783	2.166
1945-11-15 20:41:00	-294.767	2.163
1945-11-15 20:42:00	-294.75	2.16
1945-11-15 20:43:00	-294.733	2.157
1945-11-15 20:44:00	-294.717	2.154
1945-11-15 20:45:00	-294.7	2.15
1945-11-15 20:46:00	-294.683	2.147
1945-11-15 20:47:00	-294.667	2.144
1945-11-15 20:48:00	-294.65	2.14
1945-11-15 20:49:00	-294.633	2.137
1945-11-15 20:50:00	-294.617	2.134
1945-11-15 20:51:00	-294.6	2.13
1945-11-15 20:52:00	-294.583	2.127
1945-11-15 20:53:00	-294.567	2.123
1945-11-15 20:54:00	-294.55	2.12
1945-11-15 20:55:00	-294.533	2.116
1945-11-15 20:56:00	-294.517	2.112
1945-11-15 20:57:00	-294.5	2.109
1945-11-15 20:58:00	-294.483	2.105
1945-11-15 20:59:00	-294.467	2.101
1945-11-15 21:00:00	-294.45	2.097
1945-11-15 21:01:00	-294.433	2.093
1945-11-15 21:02:00	-294.417	2.089
1945-11-15 21:03:00	-294.4	2.086
1945-11-15 21:04:00	-294.383	2.082
1945-11-15 21:05:00	-294.367	2.078
1945-11-15 21:06:00	-294.35	2.073
1945-11-15 21:07:00	-294.333	2.069
1945-11-15 21:08:00	-294.317	2.065
1945-11-15 21:09:00	-294.3	2.061
1945-11-15 21:10:00	-294.283	2.057
1945-11-15 21:11:00	-294.267	2.053
1945-11-15 21:12:00	-294.25	2.048
1945-11-15 21:13:00	-294.233	2.044
1945-11-15 21:14:00	-294.217	2.04
1945-11-15 21:15:00	-294.2	2.035
1945-11-15 21:16:00	-294.183	2.031
1945-11-15 21:17:00	-294.167	2.027
1945-11-15 21:18:00	-294.15	2.022
1945-11-15 21:19:00	-294.133	2.018
1945-11-15 21:20:00	-294.117	2.013
1945-11-15 21:21:00	-294.1	2.008
1945-11-15 21:22:00	-294.083	2.004
1945-11-15 21:23:00	-294.067	1.999
1945-11-15 21:24:00	-294.05	1.995
1945-11-15 21:25:00	-294.033	1.99
1945-11-15 21:26:00	-294.017	1.985
1945-11-15 21:27:00	-294	1.981
1945-11-15 21:28:00	-293.983	1.976
1945-11-15 21:29:00	-293.967	1.971
1945-11-15 21:30:00	-293.95	1.966
1945-11-15 21:31:00	-293.933	1.961
1945-11-15 21:32:00	-293.917	1.956
1945-11-15 21:33:00	-293.9	1.952
1945-11-15 21:34:00	-293.883	1.947
1945-11-15 21:35:00	-293.867	1.942
1945-11-15 21:36:00	-293.85	1.937
1945-11-15 21:37:00	-293.833	1.932
1945-11-15 21:38:00	-293.817	1.927
1945-11-15 21:39:00	-293.8	1.922
1945-11-15 21:40:00	-293.783	1.917
1945-11-15 21:41:00	-293.767	1.911
1945-11-15 21:42:00	-293.75	1.906
1945-11-15 21:43:00	-293.733	1.901
1945-11-15 21:44:00	-293.717	1.896
1945-11-15 21:45:00	-293.7	1.891
1945-11-15 21:46:00	-293.683	1.886
1945-11-15 21:47:00	-293.667	1.88
1945-11-15 21:48:00	-293.65	1.875
1945-11-15 21:49:00	-293.633	1.87
1945-11-15 21:50:00	-293.617	1.865
1945-11-15 21:51:00	-293.6	1.859
1945-11-15 21:52:00	-293.583	1.854
1945-11-15 21:53:00	-293.567	1.849
1945-11-15 21:54:00	-293.55	1.843
1945-11-15 21:55:00	-293.533	1.838
1945-11-15 21:56:00	-293.517	1.833
1945-11-15 21:57:00	-293.5	1.827
1945-11-15 21:58:00	-293.483	1.822
1945-11-15 21:59:00	-293.467	1.816
1945-11-15 22:00:00	-293.45	1.811
1945-11-15 22:01:00	-293.433	1.805
1945-11-15 22:02:00	-293.417	1.8
1945-11-15 22:03:00	-293.4	1.794
1945-11-15 22:04:00	-293.383	1.789
1945-11-15 22:05:00	-293.367	1.783
1945-11-15 22:06:00	-293.35	1.778
1945-11-15 22:07:00	-293.333	1.772
1945-11-15 22:08:00	-293.317	1.767
1945-11-15 22:09:00	-293.3	1.761
1945-11-15 22:10:00	-293.283	1.756
1945-11-15 22:11:00	-293.267	1.75
1945-11-15 22:12:00	-293.25	1.744
1945-11-15 22:13:00	-293.233	1.739
1945-11-15 22:14:00	-293.217	1.733
1945-11-15 22:15:00	-293.2	1.728
1945-11-15 22:16:00	-293.183	1.722
1945-11-15 22:17:00	-293.167	1.716
1945-11-15 22:18:00	-293.15	1.711
1945-11-15 22:19:00	-293.133	1.705
1945-11-15 22:20:00	-293.117	1.699
1945-11-15 22:21:00	-293.1	1.694
1945-11-15 22:22:00	-293.083	1.688
1945-11-15 22:23:00	-293.067	1.682
1945-11-15 22:24:00	-293.05	1.677
1945-11-15 22:25:00	-293.033	1.671
1945-11-15 22:26:00	-293.017	1.665
1945-11-15 22:27:00	-293	1.659
1945-11-15 22:28:00	-292.983	1.654
1945-11-15 22:29:00	-292.967	1.648
1945-11-15 22:30:00	-292.95	1.642
1945-11-15 22:31:00	-292.933	1.637
1945-11-15 22:32:00	-292.917	1.631
1945-11-15 22:33:00	-292.9	1.625
1945-11-15 22:34:00	-292.883	1.619
1945-11-15 22:35:00	-292.867	1.614
1945-11-15 22:36:00	-292.85	1.608
1945-11-15 22:37:00	-292.833	1.602
1945-11-15 22:38:00	-292.817	1.596
1945-11-15 22:39:00	-292.8	1.591
1945-11-15 22:40:00	-292.783	1.585
1945-11-15 22:41:00	-292.767	1.579
1945-11-15 22:42:00	-292.75	1.573
1945-11-15 22:43:00	-292.733	1.568
1945-11-15 22:44:00	-292.717	1.562
1945-11-15 22:45:00	-292.7	1.556
1945-11-15 22:46:00	-292.683	1.551
1945-11-15 22:47:00	-292.667	1.545
1945-11-15 22:48:00	-292.65	1.539
1945-11-15 22:49:00	-292.633	1.533
1945-11-15 22:50:00	-292.617	1.528
1945-11-15 22:51:00	-292.6	1.522
1945-11-15 22:52:00	-292.583	1.516
1945-11-15 22:53:00	-292.567	1.511
1945-11-15 22:54:00	-292.55	1.505
1945-11-15 22:55:00	-292.533	1.499
1945-11-15 22:56:00	-292.517	1.494
1945-11-15 22:57:00	-292.5	1.488
1945-11-15 22:58:00	-292.483	1.482
1945-11-15 22:59:00	-292.467	1.477
1945-11-15 23:00:00	-292.45	1.471
1945-11-15 23:01:00	-292.433	1.465
1945-11-15 23:02:00	-292.417	1.46
1945-11-15 23:03:00	-292.4	1.454
1945-11-15 23:04:00	-292.383	1.448
1945-11-15 23:05:00	-292.367	1.443
1945-11-15 23:06:00	-292.35	1.437
1945-11-15 23:07:00	-292.333	1.432
1945-11-15 23:08:00	-292.317	1.426
1945-11-15 23:09:00	-292.3	1.421
1945-11-15 23:10:00	-292.283	1.415
1945-11-15 23:11:00	-292.267	1.41
1945-11-15 23:12:00	-292.25	1.404
1945-11-15 23:13:00	-292.233	1.399
1945-11-15 23:14:00	-292.217	1.393
1945-11-15 23:15:00	-292.2	1.388
1945-11-15 23:16:00	-292.183	1.382
1945-11-15 23:17:00	-292.167	1.377
1945-11-15 23:18:00	-292.15	1.371
1945-11-15 23:19:00	-292.133	1.366
1945-11-15 23:20:00	-292.117	1.361
1945-11-15 23:21:00	-292.1	1.355
1945-11-15 23:22:00	-292.083	1.35
1945-11-15 23:23:00	-292.067	1.344
1945-11-15 23:24:00	-292.05	1.339
1945-11-15 23:25:00	-292.033	1.334
1945-11-15 23:26:00	-292.017	1.329
1945-11-15 23:27:00	-292	1.323
1945-11-15 23:28:00	-291.983	1.318
1945-11-15 23:29:00	-291.967	1.313
1945-11-15 23:30:00	-291.95	1.308
1945-11-15 23:31:00	-291.933	1.302
1945-11-15 23:32:00	-291.917	1.297
1945-11-15 23:33:00	-291.9	1.292
1945-11-15 23:34:00	-291.883	1.287
1945-11-15 23:35:00	-291.867	1.282
1945-11-15 23:36:00	-291.85	1.277
1945-11-15 23:37:00	-291.833	1.272
1945-11-15 23:38:00	-291.817	1.267
1945-11-15 23:39:00	-291.8	1.262
1945-11-15 23:40:00	-291.783	1.257
1945-11-15 23:41:00	-291.767	1.252
1945-11-15 23:42:00	-291.75	1.247
1945-11-15 23:43:00	-291.733	1.242
1945-11-15 23:44:00	-291.717	1.237
1945-11-15 23:45:00	-291.7	1.232
1945-11-15 23:46:00	-291.683	1.228
1945-11-15 23:47:00	-291.667	1.223
1945-11-15 23:48:00	-291.65	1.218
1945-11-15 23:49:00	-291.633	1.213
1945-11-15 23:50:00	-291.617	1.209
1945-11-15 23:51:00	-291.6	1.204
1945-11-15 23:52:00	-291.583	1.199
1945-11-15 23:53:00	-291.567	1.195
1945-11-15 23:54:00	-291.55	1.19
1945-11-15 23:55:00	-291.533	1.185
1945-11-15 23:56:00	-291.517	1.181
1945-11-15 23:57:00	-291.5	1.176
1945-11-15 23:58:00	-291.483	1.172
1945-11-15 23:59:00	-291.467	1.168
1945-11-16	-291.45	1.163
1945-11-16 00:01:00	-291.433	1.159
1945-11-16 00:02:00	-291.417	1.154
1945-11-16 00:03:00	-291.4	1.15
1945-11-16 00:04:00	-291.383	1.146
1945-11-16 00:05:00	-291.367	1.142
1945-11-16 00:06:00	-291.35	1.137
1945-11-16 00:07:00	-291.333	1.133
1945-11-16 00:08:00	-291.317	1.129
1945-11-16 00:09:00	-291.3	1.125
1945-11-16 00:10:00	-291.283	1.121
1945-11-16 00:11:00	-291.267	1.117
1945-11-16 00:12:00	-291.25	1.113
1945-11-16 00:13:00	-291.233	1.109
1945-11-16 00:14:00	-291.217	1.105
1945-11-16 00:15:00	-291.2	1.101
1945-11-16 00:16:00	-291.183	1.097
1945-11-16 00:17:00	-291.167	1.094
1945-11-16 00:18:00	-291.15	1.09
1945-11-16 00:19:00	-291.133	1.086
1945-11-16 00:20:00	-291.117	1.083
1945-11-16 00:21:00	-291.1	1.079
1945-11-16 00:22:00	-291.083	1.075
1945-11-16 00:23:00	-291.067	1.072
1945-11-16 00:24:00	-291.05	1.068
1945-11-16 00:25:00	-291.033	1.065
1945-11-16 00:26:00	-291.017	1.061
1945-11-16 00:27:00	-291	1.058
1945-11-16 00:28:00	-290.983	1.055
1945-11-16 00:29:00	-290.967	1.051
1945-11-16 00:30:00	-290.95	1.048
1945-11-16 00:31:00	-290.933	1.045
1945-11-16 00:32:00	-290.917	1.042
1945-11-16 00:33:00	-290.9	1.039
1945-11-16 00:34:00	-290.883	1.036
1945-11-16 00:35:00	-290.867	1.033
1945-11-16 00:36:00	-290.85	1.03
1945-11-16 00:37:00	-290.833	1.027
1945-11-16 00:38:00	-290.817	1.024
1945-11-16 00:39:00	-290.8	1.021
1945-11-16 00:40:00	-290.783	1.018
1945-11-16 00:41:00	-290.767	1.016
1945-11-16 00:42:00	-290.75	1.013
1945-11-16 00:43:00	-290.733	1.01
1945-11-16 00:44:00	-290.717	1.008
1945-11-16 00:45:00	-290.7	1.005
1945-11-16 00:46:00	-290.683	1.003
1945-11-16 00:47:00	-290.667	1
1945-11-16 00:48:00	-290.65	0.998
1945-11-16 00:49:00	-290.633	0.995
1945-11-16 00:50:00	-290.617	0.993
1945-11-16 00:51:00	-290.6	0.991
1945-11-16 00:52:00	-290.583	0.989
1945-11-16 00:53:00	-290.567	0.987
1945-11-16 00:54:00	-290.55	0.985
1945-11-16 00:55:00	-290.533	0.983
1945-11-16 00:56:00	-290.517	0.981
1945-11-16 00:57:00	-290.5	0.979
1945-11-16 00:58:00	-290.483	0.977
1945-11-16 00:59:00	-290.467	0.975
1945-11-16 01:00:00	-290.45	0.973
1945-11-16 01:01:00	-290.433	0.972
1945-11-16 01:02:00	-290.417	0.97
1945-11-16 01:03:00	-290.4	0.969
1945-11-16 01:04:00	-290.383	0.967
1945-11-16 01:05:00	-290.367	0.966
1945-11-16 01:06:00	-290.35	0.964
1945-11-16 01:07:00	-290.333	0.963
1945-11-16 01:08:00	-290.317	0.962
1945-11-16 01:09:00	-290.3	0.96
1945-11-16 01:10:00	-290.283	0.959
1945-11-16 01:11:00	-290.267	0.958
1945-11-16 01:12:00	-290.25	0.957
1945-11-16 01:13:00	-290.233	0.956
1945-11-16 01:14:00	-290.217	0.955
1945-11-16 01:15:00	-290.2	0.954
1945-11-16 01:16:00	-290.183	0.954
1945-11-16 01:17:00	-290.167	0.953
1945-11-16 01:18:00	-290.15	0.952
1945-11-16 01:19:00	-290.133	0.952
1945-11-16 01:20:00	-290.117	0.951
1945-11-16 01:21:00	-290.1	0.951
1945-11-16 01:22:00	-290.083	0.95
1945-11-16 01:23:00	-290.067	0.95
1945-11-16 01:24:00	-290.05	0.95
1945-11-16 01:25:00	-290.033	0.95
1945-11-16 01:26:00	-290.017	0.949
1945-11-16 01:27:00	-290	0.949
1945-11-16 01:28:00	-289.983	0.949
1945-11-16 01:29:00	-289.967	0.949
1945-11-16 01:30:00	-289.95	0.95
1945-11-16 01:31:00	-289.933	0.95
1945-11-16 01:32:00	-289.917	0.95
1945-11-16 01:33:00	-289.9	0.95
1945-11-16 01:34:00	-289.883	0.951
1945-11-16 01:35:00	-289.867	0.951
1945-11-16 01:36:00	-289.85	0.952
1945-11-16 01:37:00	-289.833	0.953
1945-11-16 01:38:00	-289.817	0.953
1945-11-16 01:39:00	-289.8	0.954
1945-11-16 01:40:00	-289.783	0.955
1945-11-16 01:41:00	-289.767	0.956
1945-11-16 01:42:00	-289.75	0.957
1945-11-16 01:43:00	-289.733	0.958
1945-11-16 01:44:00	-289.717	0.959
1945-11-16 01:45:00	-289.7	0.96
1945-11-16 01:46:00	-289.683	0.962
1945-11-16 01:47:00	-289.667	0.963
1945-11-16 01:48:00	-289.65	0.964
1945-11-16 01:49:00	-289.633	0.966
1945-11-16 01:50:00	-289.617	0.967
1945-11-16 01:51:00	-289.6	0.969
1945-11-16 01:52:00	-289.583	0.97
1945-11-16 01:53:00	-289.567	0.972
1945-11-16 01:54:00	-289.55	0.974
1945-11-16 01:55:00	-289.533	0.976
1945-11-16 01:56:00	-289.517	0.978
1945-11-16 01:57:00	-289.5	0.98
1945-11-16 01:58:00	-289.483	0.982
1945-11-16 01:59:00	-289.467	0.984
1945-11-16 02:00:00	-289.45	0.986
1945-11-16 02:01:00	-289.433	0.988
1945-11-16 02:02:00	-289.417	0.99
1945-11-16 02:03:00	-289.4	0.993
1945-11-16 02:04:00	-289.383	0.995
1945-11-16 02:05:00	-289.367	0.998
1945-11-16 02:06:00	-289.35	1
1945-11-16 02:07:00	-289.333	1.003
1945-11-16 02:08:00	-289.317	1.005
1945-11-16 02:09:00	-289.3	1.008
1945-11-16 02:10:00	-289.283	1.011
1945-11-16 02:11:00	-289.267	1.013
1945-11-16 02:12:00	-289.25	1.016
1945-11-16 02:13:00	-289.233	1.019
1945-11-16 02:14:00	-289.217	1.022
1945-11-16 02:15:00	-289.2	1.025
1945-11-16 02:16:00	-289.183	1.028
1945-11-16 02:17:00	-289.167	1.031
1945-11-16 02:18:00	-289.15	1.035
1945-11-16 02:19:00	-289.133	1.038
1945-11-16 02:20:00	-289.117	1.041
1945-11-16 02:21:00	-289.1	1.044
1945-11-16 02:22:00	-289.083	1.048
1945-11-16 02:23:00	-289.067	1.051
1945-11-16 02:24:00	-289.05	1.055
1945-11-16 02:25:00	-289.033	1.058
1945-11-16 02:26:00	-289.017	1.062
1945-11-16 02:27:00	-289	1.065
1945-11-16 02:28:00	-288.983	1.069
1945-11-16 02:29:00	-288.967	1.073
1945-11-16 02:30:00	-288.95	1.077
1945-11-16 02:31:00	-288.933	1.081
1945-11-16 02:32:00	-288.917	1.084
1945-11-16 02:33:00	-288.9	1.088
1945-11-16 02:34:00	-288.883	1.092
1945-11-16 02:35:00	-288.867	1.096
1945-11-16 02:36:00	-288.85	1.101
1945-11-16 02:37:00	-288.833	1.105
1945-11-16 02:38:00	-288.817	1.109
1945-11-16 02:39:00	-288.8	1.113
1945-11-16 02:40:00	-288.783	1.117
1945-11-16 02:41:00	-288.767	1.122
1945-11-16 02:42:00	-288.75	1.126
1945-11-16 02:43:00	-288.733	1.13
1945-11-16 02:44:00	-288.717	1.135
1945-11-16 02:45:00	-288.7	1.139
1945-11-16 02:46:00	-288.683	1.144
1945-11-16 02:47:00	-288.667	1.149
1945-11-16 02:48:00	-288.65	1.153
1945-11-16 02:49:00	-288.633	1.158
1945-11-16 02:50:00	-288.617	1.163
1945-11-16 02:51:00	-288.6	1.167
1945-11-16 02:52:00	-288.583	1.172
1945-11-16 02:53:00	-288.567	1.177
1945-11-16 02:54:00	-288.55	1.182
1945-11-16 02:55:00	-288.533	1.187
1945-11-16 02:56:00	-288.517	1.192
1945-11-16 02:57:00	-288.5	1.197
1945-11-16 02:58:00	-288.483	1.202
1945-11-16 02:59:00	-288.467	1.207
1945-11-16 03:00:00	-288.45	1.212
1945-11-16 03:01:00	-288.433	1.217
1945-11-16 03:02:00	-288.417	1.222
1945-11-16 03:03:00	-288.4	1.227
1945-11-16 03:04:00	-288.383	1.233
1945-11-16 03:05:00	-288.367	1.238
1945-11-16 03:06:00	-288.35	1.243
1945-11-16 03:07:00	-288.333	1.249
1945-11-16 03:08:00	-288.317	1.254
1945-11-16 03:09:00	-288.3	1.26
1945-11-16 03:10:00	-288.283	1.265
1945-11-16 03:11:00	-288.267	1.271
1945-11-16 03:12:00	-288.25	1.276
1945-11-16 03:13:00	-288.233	1.282
1945-11-16 03:14:00	-288.217	1.287
1945-11-16 03:15:00	-288.2	1.293
1945-11-16 03:16:00	-288.183	1.299
1945-11-16 03:17:00	-288.167	1.304
1945-11-16 03:18:00	-288.15	1.31
1945-11-16 03:19:00	-288.133	1.316
1945-11-16 03:20:00	-288.117	1.322
1945-11-16 03:21:00	-288.1	1.327
1945-11-16 03:22:00	-288.083	1.333
1945-11-16 03:23:00	-288.067	1.339
1945-11-16 03:24:00	-288.05	1.345
1945-11-16 03:25:00	-288.033	1.351
1945-11-16 03:26:00	-288.017	1.357
1945-11-16 03:27:00	-288	1.363
1945-11-16 03:28:00	-287.983	1.369
1945-11-16 03:29:00	-287.967	1.375
1945-11-16 03:30:00	-287.95	1.381
1945-11-16 03:31:00	-287.933	1.387
1945-11-16 03:32:00	-287.917	1.393
1945-11-16 03:33:00	-287.9	1.4
1945-11-16 03:34:00	-287.883	1.406
1945-11-16 03:35:00	-287.867	1.412
1945-11-16 03:36:00	-287.85	1.418
1945-11-16 03:37:00	-287.833	1.424
1945-11-16 03:38:00	-287.817	1.431
1945-11-16 03:39:00	-287.8	1.437
1945-11-16 03:40:00	-287.783	1.443
1945-11-16 03:41:00	-287.767	1.45
1945-11-16 03:42:00	-287.75	1.456
1945-11-16 03:43:00	-287.733	1.462
1945-11-16 03:44:00	-287.717	1.469
1945-11-16 03:45:00	-287.7	1.475
1945-11-16 03:46:00	-287.683	1.482
1945-11-16 03:47:00	-287.667	1.488
1945-11-16 03:48:00	-287.65	1.495
1945-11-16 03:49:00	-287.633	1.501
1945-11-16 03:50:00	-287.617	1.508
1945-11-16 03:51:00	-287.6	1.514
1945-11-16 03:52:00	-287.583	1.521
1945-11-16 03:53:00	-287.567	1.528
1945-11-16 03:54:00	-287.55	1.534
1945-11-16 03:55:00	-287.533	1.541
1945-11-16 03:56:00	-287.517	1.547
1945-11-16 03:57:00	-287.5	1.554
1945-11-16 03:58:00	-287.483	1.561
1945-11-16 03:59:00	-287.467	1.567
1945-11-16 04:00:00	-287.45	1.574
1945-11-16 04:01:00	-287.433	1.581
1945-11-16 04:02:00	-287.417	1.588
1945-11-16 04:03:00	-287.4	1.594
1945-11-16 04:04:00	-287.383	1.601
1945-11-16 04:05:00	-287.367	1.608
1945-11-16 04:06:00	-287.35	1.615
1945-11-16 04:07:00	-287.333	1.622
1945-11-16 04:08:00	-287.317	1.628
1945-11-16 04:09:00	-287.3	1.635
1945-11-16 04:10:00	-287.283	1.642
1945-11-16 04:11:00	-287.267	1.649
1945-11-16 04:12:00	-287.25	1.656
1945-11-16 04:13:00	-287.233	1.663
1945-11-16 04:14:00	-287.217	1.67
1945-11-16 04:15:00	-287.2	1.676
1945-11-16 04:16:00	-287.183	1.683
1945-11-16 04:17:00	-287.167	1.69
1945-11-16 04:18:00	-287.15	1.697
1945-11-16 04:19:00	-287.133	1.704
1945-11-16 04:20:00	-287.117	1.711
1945-11-16 04:21:00	-287.1	1.718
1945-11-16 04:22:00	-287.083	1.725
1945-11-16 04:23:00	-287.067	1.732
1945-11-16 04:24:00	-287.05	1.739
1945-11-16 04:25:00	-287.033	1.746
1945-11-16 04:26:00	-287.017	1.753
1945-11-16 04:27:00	-287	1.76
1945-11-16 04:28:00	-286.983	1.767
1945-11-16 04:29:00	-286.967	1.774
1945-11-16 04:30:00	-286.95	1.781
1945-11-16 04:31:00	-286.933	1.788
1945-11-16 04:32:00	-286.917	1.795
1945-11-16 04:33:00	-286.9	1.802
1945-11-16 04:34:00	-286.883	1.809
1945-11-16 04:35:00	-286.867	1.816
1945-11-16 04:36:00	-286.85	1.823
1945-11-16 04:37:00	-286.833	1.83
1945-11-16 04:38:00	-286.817	1.837
1945-11-16 04:39:00	-286.8	1.844
1945-11-16 04:40:00	-286.783	1.851
1945-11-16 04:41:00	-286.767	1.858
1945-11-16 04:42:00	-286.75	1.865
1945-11-16 04:43:00	-286.733	1.872
1945-11-16 04:44:00	-286.717	1.879
1945-11-16 04:45:00	-286.7	1.886
1945-11-16 04:46:00	-286.683	1.893
1945-11-16 04:47:00	-286.667	1.9
1945-11-16 04:48:00	-286.65	1.907
1945-11-16 04:49:00	-286.633	1.914
1945-11-16 04:50:00	-286.617	1.921
1945-11-16 04:51:00	-286.6	1.928
1945-11-16 04:52:00	-286.583	1.935
1945-11-16 04:53:00	-286.567	1.942
1945-11-16 04:54:00	-286.55	1.949
1945-11-16 04:55:00	-286.533	1.956
1945-11-16 04:56:00	-286.517	1.963
1945-11-16 04:57:00	-286.5	1.97
1945-11-16 04:58:00	-286.483	1.977
1945-11-16 04:59:00	-286.467	1.984
1945-11-16 05:00:00	-286.45	1.991
1945-11-16 05:01:00	-286.433	1.998
1945-11-16 05:02:00	-286.417	2.005
1945-11-16 05:03:00	-286.4	2.012
1945-11-16 05:04:00	-286.383	2.018
1945-11-16 05:05:00	-286.367	2.025
1945-11-16 05:06:00	-286.35	2.032
1945-11-16 05:07:00	-286.333	2.039
1945-11-16 05:08:00	-286.317	2.046
1945-11-16 05:09:00	-286.3	2.053
1945-11-16 05:10:00	-286.283	2.06
1945-11-16 05:11:00	-286.267	2.067
1945-11-16 05:12:00	-286.25	2.073
1945-11-16 05:13:00	-286.233	2.08
1945-11-16 05:14:00	-286.217	2.087
1945-11-16 05:15:00	-286.2	2.094
1945-11-16 05:16:00	-286.183	2.101
1945-11-16 05:17:00	-286.167	2.107
1945-11-16 05:18:00	-286.15	2.114
1945-11-16 05:19:00	-286.133	2.121
1945-11-16 05:20:00	-286.117	2.128
1945-11-16 05:21:00	-286.1	2.134
1945-11-16 05:22:00	-286.083	2.141
1945-11-16 05:23:00	-286.067	2.148
1945-11-16 05:24:00	-286.05	2.154
1945-11-16 05:25:00	-286.033	2.161
1945-11-16 05:26:00	-286.017	2.168
1945-11-16 05:27:00	-286	2.174
1945-11-16 05:28:00	-285.983	2.181
1945-11-16 05:29:00	-285.967	2.187
1945-11-16 05:30:00	-285.95	2.194
1945-11-16 05:31:00	-285.933	2.2
1945-11-16 05:32:00	-285.917	2.207
1945-11-16 05:33:00	-285.9	2.213
1945-11-16 05:34:00	-285.883	2.22
1945-11-16 05:35:00	-285.867	2.226
1945-11-16 05:36:00	-285.85	2.233
1945-11-16 05:37:00	-285.833	2.239
1945-11-16 05:38:00	-285.817	2.246
1945-11-16 05:39:00	-285.8	2.252
1945-11-16 05:40:00	-285.783	2.258
1945-11-16 05:41:00	-285.767	2.265
1945-11-16 05:42:00	-285.75	2.271
1945-11-16 05:43:00	-285.733	2.277
1945-11-16 05:44:00	-285.717	2.283
1945-11-16 05:45:00	-285.7	2.29
1945-11-16 05:46:00	-285.683	2.296
1945-11-16 05:47:00	-285.667	2.302
1945-11-16 05:48:00	-285.65	2.308
1945-11-16 05:49:00	-285.633	2.314
1945-11-16 05:50:00	-285.617	2.32
1945-11-16 05:51:00	-285.6	2.326
1945-11-16 05:52:00	-285.583	2.332
1945-11-16 05:53:00	-285.567	2.338
1945-11-16 05:54:00	-285.55	2.344
1945-11-16 05:55:00	-285.533	2.35
1945-11-16 05:56:00	-285.517	2.356
1945-11-16 05:57:00	-285.5	2.362
1945-11-16 05:58:00	-285.483	2.368
1945-11-16 05:59:00	-285.467	2.374
1945-11-16 06:00:00	-285.45	2.38
1945-11-16 06:01:00	-285.433	2.386
1945-11-16 06:02:00	-285.417	2.391
1945-11-16 06:03:00	-285.4	2.397
1945-11-16 06:04:00	-285.383	2.403
1945-11-16 06:05:00	-285.367	2.408
1945-11-16 06:06:00	-285.35	2.414
1945-11-16 06:07:00	-285.333	2.42
1945-11-16 06:08:00	-285.317	2.425
1945-11-16 06:09:00	-285.3	2.431
1945-11-16 06:10:00	-285.283	2.436
1945-11-16 06:11:00	-285.267	2.442
1945-11-16 06:12:00	-285.25	2.447
1945-11-16 06:13:00	-285.233	2.452
1945-11-16 06:14:00	-285.217	2.458
1945-11-16 06:15:00	-285.2	2.463
1945-11-16 06:16:00	-285.183	2.468
1945-11-16 06:17:00	-285.167	2.474
1945-11-16 06:18:00	-285.15	2.479
1945-11-16 06:19:00	-285.133	2.484
1945-11-16 06:20:00	-285.117	2.489
1945-11-16 06:21:00	-285.1	2.494
1945-11-16 06:22:00	-285.083	2.499
1945-11-16 06:23:00	-285.067	2.504
1945-11-16 06:24:00	-285.05	2.509
1945-11-16 06:25:00	-285.033	2.514
1945-11-16 06:26:00	-285.017	2.519
1945-11-16 06:27:00	-285	2.524
1945-11-16 06:28:00	-284.983	2.529
1945-11-16 06:29:00	-284.967	2.534
1945-11-16 06:30:00	-284.95	2.538
1945-11-16 06:31:00	-284.933	2.543
1945-11-16 06:32:00	-284.917	2.548
1945-11-16 06:33:00	-284.9	2.552
1945-11-16 06:34:00	-284.883	2.557
1945-11-16 06:35:00	-284.867	2.561
1945-11-16 06:36:00	-284.85	2.566
1945-11-16 06:37:00	-284.833	2.57
1945-11-16 06:38:00	-284.817	2.575
1945-11-16 06:39:00	-284.8	2.579
1945-11-16 06:40:00	-284.783	2.583
1945-11-16 06:41:00	-284.767	2.588
1945-11-16 06:42:00	-284.75	2.592
1945-11-16 06:43:00	-284.733	2.596
1945-11-16 06:44:00	-284.717	2.6
1945-11-16 06:45:00	-284.7	2.604
1945-11-16 06:46:00	-284.683	2.608
1945-11-16 06:47:00	-284.667	2.612
1945-11-16 06:48:00	-284.65	2.616
1945-11-16 06:49:00	-284.633	2.62
1945-11-16 06:50:00	-284.617	2.624
1945-11-16 06:51:00	-284.6	2.628
1945-11-16 06:52:00	-284.583	2.631
1945-11-16 06:53:00	-284.567	2.635
1945-11-16 06:54:00	-284.55	2.639
1945-11-16 06:55:00	-284.533	2.642
1945-11-16 06:56:00	-284.517	2.646
1945-11-16 06:57:00	-284.5	2.649
1945-11-16 06:58:00	-284.483	2.653
1945-11-16 06:59:00	-284.467	2.656
1945-11-16 07:00:00	-284.45	2.659
1945-11-16 07:01:00	-284.433	2.663
1945-11-16 07:02:00	-284.417	2.666
1945-11-16 07:03:00	-284.4	2.669
1945-11-16 07:04:00	-284.383	2.672
1945-11-16 07:05:00	-284.367	2.675
1945-11-16 07:06:00	-284.35	2.678
1945-11-16 07:07:00	-284.333	2.681
1945-11-16 07:08:00	-284.317	2.684
1945-11-16 07:09:00	-284.3	2.687
1945-11-16 07:10:00	-284.283	2.69
1945-11-16 07:11:00	-284.267	2.692
1945-11-16 07:12:00	-284.25	2.695
1945-11-16 07:13:00	-284.233	2.697
1945-11-16 07:14:00	-284.217	2.7
1945-11-16 07:15:00	-284.2	2.703
1945-11-16 07:16:00	-284.183	2.705
1945-11-16 07:17:00	-284.167	2.707
1945-11-16 07:18:00	-284.15	2.71
1945-11-16 07:19:00	-284.133	2.712
1945-11-16 07:20:00	-284.117	2.714
1945-11-16 07:21:00	-284.1	2.716
1945-11-16 07:22:00	-284.083	2.718
1945-11-16 07:23:00	-284.067	2.72
1945-11-16 07:24:00	-284.05	2.722
1945-11-16 07:25:00	-284.033	2.724
1945-11-16 07:26:00	-284.017	2.726
1945-11-16 07:27:00	-284	2.728
1945-11-16 07:28:00	-283.983	2.729
1945-11-16 07:29:00	-283.967	2.731
1945-11-16 07:30:00	-283.95	2.732
1945-11-16 07:31:00	-283.933	2.734
1945-11-16 07:32:00	-283.917	2.735
1945-11-16 07:33:00	-283.9	2.737
1945-11-16 07:34:00	-283.883	2.738
1945-11-16 07:35:00	-283.867	2.739
1945-11-16 07:36:00	-283.85	2.74
1945-11-16 07:37:00	-283.833	2.742
1945-11-16 07:38:00	-283.817	2.743
1945-11-16 07:39:00	-283.8	2.744
1945-11-16 07:40:00	-283.783	2.744
1945-11-16 07:41:00	-283.767	2.745
1945-11-16 07:42:00	-283.75	2.746
1945-11-16 07:43:00	-283.733	2.747
1945-11-16 07:44:00	-283.717	2.747
1945-11-16 07:45:00	-283.7	2.748
1945-11-16 07:46:00	-283.683	2.748
1945-11-16 07:47:00	-283.667	2.749
1945-11-16 07:48:00	-283.65	2.749
1945-11-16 07:49:00	-283.633	2.749
1945-11-16 07:50:00	-283.617	2.75
1945-11-16 07:51:00	-283.6	2.75
1945-11-16 07:52:00	-283.583	2.75
1945-11-16 07:53:00	-283.567	2.75
1945-11-16 07:54:00	-283.55	2.75
1945-11-16 07:55:00	-283.533	2.749
1945-11-16 07:56:00	-283.517	2.749
1945-11-16 07:57:00	-283.5	2.749
1945-11-16 07:58:00	-283.483	2.748
1945-11-16 07:59:00	-283.467	2.748
1945-11-16 08:00:00	-283.45	2.747
1945-11-16 08:01:00	-283.433	2.747
1945-11-16 08:02:00	-283.417	2.746
1945-11-16 08:03:00	-283.4	2.745
1945-11-16 08:04:00	-283.383	2.744
1945-11-16 08:05:00	-283.367	2.743
1945-11-16 08:06:00	-283.35	2.742
1945-11-16 08:07:00	-283.333	2.741
1945-11-16 08:08:00	-283.317	2.74
1945-11-16 08:09:00	-283.3	2.739
1945-11-16 08:10:00	-283.283	2.737
1945-11-16 08:11:00	-283.267	2.736
1945-11-16 08:12:00	-283.25	2.735
1945-11-16 08:13:00	-283.233	2.733
1945-11-16 08:14:00	-283.217	2.731
1945-11-16 08:15:00	-283.2	2.73
1945-11-16 08:16:00	-283.183	2.728
1945-11-16 08:17:00	-283.167	2.726
1945-11-16 08:18:00	-283.15	2.724
1945-11-16 08:19:00	-283.133	2.722
1945-11-16 08:20:00	-283.117	2.72
1945-11-16 08:21:00	-283.1	2.718
1945-11-16 08:22:00	-283.083	2.716
1945-11-16 08:23:00	-283.067	2.714
1945-11-16 08:24:00	-283.05	2.711
1945-11-16 08:25:00	-283.033	2.709
1945-11-16 08:26:00	-283.017	2.707
1945-11-16 08:27:00	-283	2.704
1945-11-16 08:28:00	-282.983	2.702
1945-11-16 08:29:00	-282.967	2.699
1945-11-16 08:30:00	-282.95	2.696
1945-11-16 08:31:00	-282.933	2.693
1945-11-16 08:32:00	-282.917	2.691
1945-11-16 08:33:00	-282.9	2.688
1945-11-16 08:34:00	-282.883	2.685
1945-11-16 08:35:00	-282.867	2.682
1945-11-16 08:36:00	-282.85	2.679
1945-11-16 08:37:00	-282.833	2.676
1945-11-16 08:38:00	-282.817	2.672
1945-11-16 08:39:00	-282.8	2.669
1945-11-16 08:40:00	-282.783	2.666
1945-11-16 08:41:00	-282.767	2.662
1945-11-16 08:42:00	-282.75	2.659
1945-11-16 08:43:00	-282.733	2.655
1945-11-16 08:44:00	-282.717	2.652
1945-11-16 08:45:00	-282.7	2.648
1945-11-16 08:46:00	-282.683	2.644
1945-11-16 08:47:00	-282.667	2.641
1945-11-16 08:48:00	-282.65	2.637
1945-11-16 08:49:00	-282.633	2.633
1945-11-16 08:50:00	-282.617	2.629
1945-11-16 08:51:00	-282.6	2.625
1945-11-16 08:52:00	-282.583	2.621
1945-11-16 08:53:00	-282.567	2.617
1945-11-16 08:54:00	-282.55	2.613
1945-11-16 08:55:00	-282.533	2.609
1945-11-16 08:56:00	-282.517	2.604
1945-11-16 08:57:00	-282.5	2.6
1945-11-16 08:58:00	-282.483	2.596
1945-11-16 08:59:00	-282.467	2.591
1945-11-16 09:00:00	-282.45	2.587
1945-11-16 09:01:00	-282.433	2.582
1945-11-16 09:02:00	-282.417	2.578
1945-11-16 09:03:00	-282.4	2.573
1945-11-16 09:04:00	-282.383	2.568
1945-11-16 09:05:00	-282.367	2.564
1945-11-16 09:06:00	-282.35	2.559
1945-11-16 09:07:00	-282.333	2.554
1945-11-16 09:08:00	-282.317	2.549
1945-11-16 09:09:00	-282.3	2.544
1945-11-16 09:10:00	-282.283	2.539
1945-11-16 09:11:00	-282.267	2.534
1945-11-16 09:12:00	-282.25	2.529
1945-11-16 09:13:00	-282.233	2.524
1945-11-16 09:14:00	-282.217	2.519
1945-11-16 09:15:00	-282.2	2.514
1945-11-16 09:16:00	-282.183	2.508
1945-11-16 09:17:00	-282.167	2.503
1945-11-16 09:18:00	-282.15	2.498
1945-11-16 09:19:00	-282.133	2.492
1945-11-16 09:20:00	-282.117	2.487
1945-11-16 09:21:00	-282.1	2.481
1945-11-16 09:22:00	-282.083	2.476
1945-11-16 09:23:00	-282.067	2.47
1945-11-16 09:24:00	-282.05	2.465
1945-11-16 09:25:00	-282.033	2.459
1945-11-16 09:26:00	-282.017	2.453
1945-11-16 09:27:00	-282	2.447
1945-11-16 09:28:00	-281.983	2.442
1945-11-16 09:29:00	-281.967	2.436
1945-11-16 09:30:00	-281.95	2.43
1945-11-16 09:31:00	-281.933	2.424
1945-11-16 09:32:00	-281.917	2.418
1945-11-16 09:33:00	-281.9	2.412
1945-11-16 09:34:00	-281.883	2.406
1945-11-16 09:35:00	-281.867	2.4
1945-11-16 09:36:00	-281.85	2.394
1945-11-16 09:37:00	-281.833	2.388
1945-11-16 09:38:00	-281.817	2.381
1945-11-16 09:39:00	-281.8	2.375
1945-11-16 09:40:00	-281.783	2.369
1945-11-16 09:41:00	-281.767	2.363
1945-11-16 09:42:00	-281.75	2.356
1945-11-16 09:43:00	-281.733	2.35
1945-11-16 09:44:00	-281.717	2.343
1945-11-16 09:45:00	-281.7	2.337
1945-11-16 09:46:00	-281.683	2.331
1945-11-16 09:47:00	-281.667	2.324
1945-11-16 09:48:00	-281.65	2.317
1945-11-16 09:49:00	-281.633	2.311
1945-11-16 09:50:00	-281.617	2.304
1945-11-16 09:51:00	-281.6	2.298
1945-11-16 09:52:00	-281.583	2.291
1945-11-16 09:53:00	-281.567	2.284
[truncated: 21,922 more rows]

## Sheet: Table S3
Control point (in appendices, called an extremum)	Predicted in Admiralty tide tables. Main basis for Admiralty Tide (App. B)			Selected by eye on marigram scan. Used to check fitted values			Fitted with a least-squares quadratic curve through crest or trough in marigram tracing. Used in Accepted Tide (App. A)			Computed with method diagrammed in Figure 4 and described mathematically in Appendix A. Used in Accepted Tide (App. A)			Accepted Tide control points: predicted (0, 1, 64), fitted (2-20, 23-30, 33-50, 58-63), and computed (21, 22, 31, 32, 51-57)			Alternative Tide control points derived in part by fitting a polynomial through tsunami fluctuations (App. B)
	Date and time (IST)	Hours after earthquake of 11/28/1945 0327 IST	Water level (m)	Date and time (IST)	Hours after earthquake of 11/28/1945 0327 IST	Water level (m)	Date and time (IST)	Hours after earthquake of 11/28/1945 0327 IST	Water level (m)	Date and time (IST)	Hours after earthquake of 11/28/1945 0327 IST	Water level (m)	Date and time (IST)	Hours after earthquake of 11/28/1945 0327 IST	Water level (m)	Date and time (IST)	Hours after earthquake of 11/28/1945 0327 IST	Water level (m)
0	1945-11-15 00:35:00	-314.867	0.8534										1945-11-15 00:35:00	-314.867	0.8534	1945-11-15 00:35:00	-314.867	0.7774
1	1945-11-15 07:17:00	-308.167	2.5603										1945-11-15 07:17:00	-308.167	2.5603	1945-11-15 07:27:00	-308	2.5978
2	1945-11-15 13:46:00	-301.683	0.762	1945-11-15 13:42:00	-301.75	0.943	1945-11-15 13:49:53	-301.618	0.929				1945-11-15 13:49:53	-301.618	0.929	1945-11-15 13:51:00	-301.6	0.8767
3	1945-11-15 19:40:00	-295.783	2.225	1945-11-15 19:49:00	-295.633	2.273	1945-11-15 19:47:34	-295.657	2.2491				1945-11-15 19:47:34	-295.657	2.2491	1945-11-15 19:41:00	-295.767	2.2718
4	1945-11-16 01:43:00	-289.733	0.823	1945-11-16 01:30:00	-289.95	0.961	1945-11-16 01:27:25	-289.993	0.9494				1945-11-16 01:27:25	-289.993	0.9494	1945-11-16 01:40:00	-289.783	0.9472
5	1945-11-16 08:00:00	-283.45	2.6822	1945-11-16 08:01:00	-283.433	2.769	1945-11-16 07:52:11	-283.58	2.7497				1945-11-16 07:52:11	-283.58	2.7497	1945-11-16 08:00:00	-283.45	2.8432
6	1945-11-16 14:28:00	-276.983	0.3962	1945-11-16 14:24:00	-277.05	0.597	1945-11-16 14:34:00	-276.883	0.6026				1945-11-16 14:34:00	-276.883	0.6026	1945-11-16 14:30:00	-276.95	0.5285
7	1945-11-16 20:48:00	-270.65	2.4994	1945-11-16 20:51:00	-270.6	2.561	1945-11-16 20:45:51	-270.686	2.5395				1945-11-16 20:45:51	-270.686	2.5395	1945-11-16 20:47:00	-270.667	2.5578
8	1945-11-17 02:38:00	-264.817	0.823	1945-11-17 02:29:00	-264.967	0.953	1945-11-17 02:26:39	-265.006	0.9422				1945-11-17 02:26:39	-265.006	0.9422	1945-11-17 02:34:00	-264.883	0.932
9	1945-11-17 08:43:00	-258.733	2.8042	1945-11-17 08:53:00	-258.567	2.915	1945-11-17 08:36:41	-258.838	2.8909				1945-11-17 08:36:41	-258.838	2.8909	1945-11-17 08:42:00	-258.75	2.9819
10	1945-11-17 15:10:00	-252.283	0.0914	1945-11-17 15:14:00	-252.217	0.22	1945-11-17 15:24:09	-252.047	0.2335				1945-11-17 15:24:09	-252.047	0.2335	1945-11-17 15:12:00	-252.25	0.1861
11	1945-11-17 21:45:00	-245.7	2.7432	1945-11-17 21:51:00	-245.6	2.804	1945-11-17 21:41:11	-245.763	2.7855				1945-11-17 21:41:11	-245.763	2.7855	1945-11-17 21:46:00	-245.683	2.809
12	1945-11-18 03:28:00	-239.983	0.7925	1945-11-18 03:30:00	-239.95	0.864	1945-11-18 03:26:54	-240.001	0.8828				1945-11-18 03:26:54	-240.001	0.8828	1945-11-18 03:28:00	-239.983	0.8852
13	1945-11-18 09:31:00	-233.933	2.8956	1945-11-18 09:30:00	-233.95	2.926	1945-11-18 09:18:54	-234.135	2.9094				1945-11-18 09:18:54	-234.135	2.9094	1945-11-18 09:29:00	-233.967	2.9625
14	1945-11-18 15:53:00	-227.567	-0.1829	1945-11-18 16:08:00	-227.317	-0.152	1945-11-18 16:02:17	-227.412	-0.1528				1945-11-18 16:02:17	-227.412	-0.1528	1945-11-18 15:53:00	-227.567	-0.1635
15	1945-11-18 22:37:00	-220.833	2.9566	1945-11-18 22:41:00	-220.767	3.01	1945-11-18 22:34:14	-220.879	2.9881				1945-11-18 22:34:14	-220.879	2.9881	1945-11-18 22:39:00	-220.8	3.0267
16	1945-11-19 04:19:00	-215.133	0.7925	1945-11-19 04:19:00	-215.133	0.921	1945-11-19 04:17:42	-215.155	0.9293				1945-11-19 04:17:42	-215.155	0.9293	1945-11-19 04:18:00	-215.15	0.9283
17	1945-11-19 10:15:00	-209.2	2.9566	1945-11-19 10:15:00	-209.2	3.012	1945-11-19 09:56:55	-209.501	3.0119				1945-11-19 09:56:55	-209.501	3.0119	1945-11-19 10:12:00	-209.25	3.0519
18	1945-11-19 16:36:00	-202.85	-0.3658	1945-11-19 16:44:00	-202.717	-0.398	1945-11-19 16:50:04	-202.615	-0.3821				1945-11-19 16:50:04	-202.615	-0.3821	1945-11-19 16:38:00	-202.817	-0.387
19	1945-11-19 23:25:00	-196.033	3.0785	1945-11-19 23:28:00	-195.983	3.118	1945-11-19 23:26:23	-196.01	3.106				1945-11-19 23:26:23	-196.01	3.106	1945-11-19 23:28:00	-195.983	3.095
20	1945-11-20 05:09:00	-190.3	0.8534	1945-11-20 05:13:00	-190.233	0.921	1945-11-20 05:09:00	-190.3	0.9329				1945-11-20 05:09:00	-190.3	0.9329	1945-11-20 05:08:00	-190.317	0.9792
21	1945-11-20 10:58:00	-184.483	2.9261							1945-11-20 10:35:22	-184.861	3.0548	1945-11-20 10:35:22	-184.861	3.0548	1945-11-20 10:54:00	-184.55	2.9803
22	1945-11-20 17:19:00	-178.133	-0.4572							1945-11-20 17:31:09	-177.931	-0.4185	1945-11-20 17:31:09	-177.931	-0.4185	1945-11-20 17:18:00	-178.15	-0.4744
23	1945-11-21 00:15:00	-171.2	3.1699	1945-11-21 00:11:00	-171.267	3.271	1945-11-21 00:10:38	-171.273	3.2463				1945-11-21 00:10:38	-171.273	3.2463	1945-11-21 00:18:00	-171.15	3.2956
24	1945-11-21 06:02:00	-165.417	0.9144	1945-11-21 06:06:00	-165.35	1.067	1945-11-21 06:00:11	-165.447	1.0685				1945-11-21 06:00:11	-165.447	1.0685	1945-11-21 06:02:00	-165.417	1.1061
25	1945-11-21 11:45:00	-159.7	2.8346	1945-11-21 11:29:00	-159.967	2.962	1945-11-21 11:17:48	-160.153	2.945				1945-11-21 11:17:48	-160.153	2.945	1945-11-21 11:41:00	-159.767	2.9474
26	1945-11-21 18:04:00	-153.383	-0.4267	1945-11-21 18:11:00	-153.267	-0.374	1945-11-21 18:14:13	-153.213	-0.3692				1945-11-21 18:14:13	-153.213	-0.3692	1945-11-21 18:06:00	-153.35	-0.4368
27	1945-11-22 01:03:00	-146.4	3.1394	1945-11-22 00:58:00	-146.483	3.109	1945-11-22 00:57:14	-146.496	3.0948				1945-11-22 00:57:14	-146.496	3.0948	1945-11-22 01:05:00	-146.367	3.1375
28	1945-11-22 06:52:00	-140.583	1.0058	1945-11-22 06:50:00	-140.617	1.044	1945-11-22 06:50:08	-140.614	1.0409				1945-11-22 06:50:08	-140.614	1.0409	1945-11-22 06:51:00	-140.6	1.0651
29	1945-11-22 12:19:00	-135.133	2.7127	1945-11-22 12:09:00	-135.3	2.725	1945-11-22 11:59:56	-135.451	2.7172				1945-11-22 11:59:56	-135.451	2.7172	1945-11-22 12:16:00	-135.183	2.7463
30	1945-11-22 18:47:00	-128.667	-0.2743	1945-11-22 18:48:00	-128.65	-0.256	1945-11-22 19:07:52	-128.319	-0.2665				1945-11-22 19:07:52	-128.319	-0.2665	1945-11-22 18:49:00	-128.633	-0.3555
31	1945-11-23 01:52:00	-121.583	3.048							1945-11-23 01:48:31	-121.641	2.9639	1945-11-23 01:48:31	-121.641	2.9639	1945-11-23 01:56:00	-121.517	2.9915
32	1945-11-23 07:47:00	-115.667	1.0973							1945-11-23 07:41:43	-115.755	1.0872	1945-11-23 07:41:43	-115.755	1.0872	1945-11-23 07:44:00	-115.717	1.1636
33	1945-11-23 13:01:00	-110.433	2.4994	1945-11-23 13:00:00	-110.45	2.587	1945-11-23 12:45:33	-110.691	2.5743				1945-11-23 12:45:33	-110.691	2.5743	1945-11-23 13:00:00	-110.45	2.5956
34	1945-11-23 19:36:00	-103.85	-0.0305	1945-11-23 19:53:00	-103.567	0.044	1945-11-23 19:50:00	-103.617	0.0461				1945-11-23 19:50:00	-103.617	0.0461	1945-11-23 19:39:00	-103.8	-0.008
35	1945-11-24 02:43:00	-96.7333	2.9261	1945-11-24 02:48:00	-96.65	2.841	1945-11-24 02:41:48	-96.7533	2.8302				1945-11-24 02:41:48	-96.7533	2.8302	1945-11-24 02:42:00	-96.75	2.8602
36	1945-11-24 08:47:00	-90.6667	1.2192	1945-11-24 08:30:00	-90.95	1.155	1945-11-24 08:38:17	-90.8119	1.1617				1945-11-24 08:38:17	-90.8119	1.1617	1945-11-24 08:45:00	-90.7	1.1689
37	1945-11-24 13:56:00	-85.5167	2.286	1945-11-24 13:39:00	-85.8	2.227	1945-11-24 13:37:20	-85.8276	2.222				1945-11-24 13:37:20	-85.8276	2.222	1945-11-24 13:56:00	-85.5167	2.2618
38	1945-11-24 20:22:00	-79.0833	0.2743	1945-11-24 20:42:00	-78.75	0.227	1945-11-24 20:42:50	-78.736	0.2415				1945-11-24 20:42:50	-78.736	0.2415	1945-11-24 20:25:00	-79.0333	0.1915
39	1945-11-25 03:39:00	-71.8	2.7737	1945-11-25 03:49:00	-71.6333	2.621	1945-11-25 03:38:46	-71.8039	2.6099				1945-11-25 03:38:46	-71.8039	2.6099	1945-11-25 03:39:00	-71.8	2.613
40	1945-11-25 09:58:00	-65.4833	1.2192	1945-11-25 09:33:00	-65.9	1.129	1945-11-25 09:44:50	-65.7026	1.1367				1945-11-25 09:44:50	-65.7026	1.1367	1945-11-25 09:55:00	-65.5333	1.1075
41	1945-11-25 15:01:00	-60.4333	2.0422	1945-11-25 14:47:00	-60.6667	1.942	1945-11-25 14:39:25	-60.7929	1.9229				1945-11-25 14:39:25	-60.7929	1.9229	1945-11-25 15:00:00	-60.45	1.952
42	1945-11-25 21:19:00	-54.1333	0.5791	1945-11-25 21:42:00	-53.75	0.504	1945-11-25 21:34:25	-53.8762	0.5048				1945-11-25 21:34:25	-53.8762	0.5048	1945-11-25 21:19:00	-54.1333	0.4595
43	1945-11-26 04:37:00	-46.8333	2.6518	1945-11-26 04:39:00	-46.8	2.5	1945-11-26 04:31:31	-46.9247	2.4768				1945-11-26 04:31:31	-46.9247	2.4768	1945-11-26 04:26:00	-47.0167	2.4593
44	1945-11-26 11:16:00	-40.1833	1.1887	1945-11-26 10:46:00	-40.6833	1.071	1945-11-26 11:02:49	-40.403	1.0686				1945-11-26 11:02:49	-40.403	1.0686	1945-11-26 11:11:00	-40.2667	1.0773
45	1945-11-26 16:22:00	-35.0833	1.8593	1945-11-26 16:24:00	-35.05	1.712	1945-11-26 16:11:17	-35.2617	1.7006				1945-11-26 16:11:17	-35.2617	1.7006	1945-11-26 16:18:00	-35.15	1.7297
46	1945-11-26 22:26:00	-29.0167	0.8534	1945-11-26 22:40:00	-28.7833	0.775	1945-11-26 22:39:52	-28.7854	0.7804				1945-11-26 22:39:52	-28.7854	0.7804	1945-11-26 22:18:00	-29.15	0.7803
47	1945-11-27 05:41:00	-21.7667	2.5298	1945-11-27 05:42:00	-21.75	2.401	1945-11-27 05:26:56	-22.001	2.3868				1945-11-27 05:26:56	-22.001	2.3868	1945-11-27 05:33:00	-21.9	2.3715
48	1945-11-27 12:34:00	-14.8833	1.0363	1945-11-27 12:30:00	-14.95	1.038	1945-11-27 12:26:44	-15.0044	1.0444				1945-11-27 12:26:44	-15.0044	1.0444	1945-11-27 12:27:00	-15	1.0212
49	1945-11-27 18:01:00	-9.4333	1.8288	1945-11-27 18:04:00	-9.3833	1.703	1945-11-27 18:07:10	-9.3305	1.6916				1945-11-27 18:07:10	-9.3305	1.6916	1945-11-27 18:00:00	-9.45	1.7079
50	1945-11-27 23:37:00	-3.8333	1.0668	1945-11-28	-3.45	0.988	1945-11-27 23:52:30	-3.5748	0.9804				1945-11-27 23:52:30	-3.5748	0.9804	1945-11-27 23:59:00	-3.4667	0.9854
51	1945-11-28 06:37:00	3.1667	2.4689	1945-11-28 07:53:00	4.4333	2.816	1945-11-28 07:08:57	3.6994	2.2711	1945-11-28 06:30:40	3.0612	2.3681	1945-11-28 06:30:40	3.0612	2.3681	1945-11-28 07:05:00	3.6333	2.2899
52	1945-11-28 13:21:00	9.9	0.8534	1945-11-28 13:53:00	10.4333	0.787	1945-11-28 13:48:00	10.35	0.9387	1945-11-28 13:22:45	9.9292	1.0341	1945-11-28 13:22:45	9.9292	1.0341	1945-11-28 13:28:00	10.0167	0.9835
53	1945-11-28 19:45:00	16.3	1.8898	1945-11-28 19:45:00	16.3	2.036	1945-11-28 19:45:58	16.3162	1.9514	1945-11-28 19:43:43	16.2788	1.9178	1945-11-28 19:43:43	16.2788	1.9178	1945-11-28 19:39:00	16.2	1.9422
54	1945-11-29 01:00:00	21.55	1.1582	1945-11-29 00:54:00	21.45	1.197	1945-11-29 00:47:54	21.3484	1.2428	1945-11-29 01:09:54	21.715	1.1496	1945-11-29 01:09:54	21.715	1.1496	1945-11-29 00:58:00	21.5167	1.2366
55	1945-11-29 07:23:00	27.9333	2.4689	1945-11-29 07:27:00	28	2.452	1945-11-29 07:20:32	27.8924	2.4249	1945-11-29 07:24:21	27.9559	2.4016	1945-11-29 07:24:21	27.9559	2.4016	1945-11-29 07:32:00	28.0833	2.4598
56	1945-11-29 14:11:00	34.7333	0.6706	1945-11-29 14:09:00	34.7	0.843	1945-11-29 14:18:49	34.8637	0.8459	1945-11-29 14:21:47	34.9131	0.9288	1945-11-29 14:21:47	34.9131	0.9288	1945-11-29 14:14:00	34.7833	0.8507
57	1945-11-29 20:47:00	41.3333	2.0726	1945-11-29 21:16:00	41.8167	2.144	1945-11-29 20:46:44	41.3291	2.1037	1945-11-29 20:38:29	41.1916	2.1802	1945-11-29 20:38:29	41.1916	2.1802	1945-11-29 20:45:00	41.3	2.153
58	1945-11-30 01:58:00	46.5167	1.1887	1945-11-30 02:00:00	46.55	1.266	1945-11-30 02:02:22	46.5897	1.2752				1945-11-30 02:02:22	46.5897	1.2752	1945-11-30 02:01:00	46.5667	1.2376
59	1945-11-30 08:02:00	52.5833	2.4689	1945-11-30 08:31:00	53.0667	2.444	1945-11-30 08:11:00	52.7333	2.4446				1945-11-30 08:11:00	52.7333	2.4446	1945-11-30 08:04:00	52.6167	2.4951
60	1945-11-30 14:41:00	59.2333	0.5182	1945-11-30 15:02:00	59.5833	0.613	1945-11-30 15:00:41	59.5616	0.6132				1945-11-30 15:00:41	59.5616	0.6132	1945-11-30 14:41:00	59.2333	0.6381
61	1945-11-30 21:37:00	66.1667	2.2555	1945-11-30 21:33:00	66.1	2.288	1945-11-30 21:21:18	65.9052	2.2654				1945-11-30 21:21:18	65.9052	2.2654	1945-11-30 21:36:00	66.15	2.2769
62	1945-12-01 02:46:00	71.3167	1.2192	1945-12-01 02:51:00	71.4	1.313	1945-12-01 02:52:57	71.4326	1.323				1945-12-01 02:52:57	71.4326	1.323	1945-12-01 02:46:00	71.3167	1.2757
63	1945-12-01 08:37:00	77.1667	2.4994	1945-12-01 08:49:00	77.3667	2.462	1945-12-01 08:43:20	77.2723	2.4481				1945-12-01 08:43:20	77.2723	2.4481	1945-12-01 08:40:00	77.2167	2.4521
64	1945-12-01 15:15:00	83.8	0.3658										1945-12-01 15:15:00	83.8	0.3658	1945-12-01 14:52:00	83.4167	0.384
